# Supplementary material for: Chemical constituents from Morus alba with proprotein convertase subtilisin/kexin type 9 expression and secretion inhibitory activity
Source: Royal Society of Chemistry journal article supplement (doi:10.1039/d3ob00225j), 2023-01-01

Supplementary Information for:

## **Chemical Constituents from *Morus alba* with Proprotein Convertase Subtilisin/Kexin Type 9 Expression and Secretion Inhibitory Activity**

Hongic Won,<sup>a</sup> Min-Gyung Son,<sup>a</sup> Pisey Pel,<sup>a</sup> Piseth Nhoek,<sup>a</sup> Chae-Yeong An,<sup>a</sup> Young-Mi Kim,<sup>a</sup> Hee-Sung Chae,<sup>a</sup> Young-Won Chin<sup>\*a</sup>

<sup>a</sup>College of Pharmacy and Research Institute of Pharmaceutical Sciences, Seoul National University, Seoul 08826, Republic of Korea

\*Corresponding author

Tel.: +82 2 880 4022. Email: ywchin@snu.ac.kr

## List of Supporting Information

|                                                                                                                                                                                                                                                                              |           |
|------------------------------------------------------------------------------------------------------------------------------------------------------------------------------------------------------------------------------------------------------------------------------|-----------|
| <b>Scheme S1.</b> Isolation scheme of compounds from <i>Morus alba</i> .....                                                                                                                                                                                                 | <b>3</b>  |
| <b>Experimental</b>                                                                                                                                                                                                                                                          |           |
| <b>1. General experimental procedures</b> .....                                                                                                                                                                                                                              | <b>4</b>  |
| <b>2. Reagents</b> .....                                                                                                                                                                                                                                                     | <b>4</b>  |
| <b>3. Plant material</b> .....                                                                                                                                                                                                                                               | <b>4</b>  |
| <b>4. Extraction and Isolation</b> .....                                                                                                                                                                                                                                     | <b>4</b>  |
| <b>5. Chemical and Spectral Data for compounds 7–20</b> .....                                                                                                                                                                                                                | <b>7</b>  |
| <b>6. Cell culture</b> .....                                                                                                                                                                                                                                                 | <b>9</b>  |
| <b>7. Cell viability test</b> .....                                                                                                                                                                                                                                          | <b>9</b>  |
| <b>8. Quantitative Real-time PCR</b> .....                                                                                                                                                                                                                                   | <b>9</b>  |
| <b>9. Western blot</b> .....                                                                                                                                                                                                                                                 | <b>10</b> |
| <b>10. ELISAs</b> .....                                                                                                                                                                                                                                                      | <b>10</b> |
| <b>11. Statistical Analysis</b> .....                                                                                                                                                                                                                                        | <b>10</b> |
| <b>Figure S1.</b> Effects of methanol extract (MAT), n-hexane fraction (MAH), chloroform fraction (MAC), ethyl acetate fraction (MAE), n-butanol fraction (MAB) and water fraction(MAW) of <i>Morus alba</i> on the LDLR and PCSK9 mRNA expressions in the HepG2 cells ..... | <b>11</b> |
| <b>Figure S2.</b> Effects of chloroform subfractions on LDLR mRNA expression in the HepG2 cells .....                                                                                                                                                                        | <b>11</b> |
| <b>Figure S3.</b> Effects of chloroform subfractions on PCSK9 mRNA expression in the HepG2 cells .....                                                                                                                                                                       | <b>12</b> |
| <b>Figure S4.</b> Cell viability test on the HepG2 cell by WST-8 assay of isolated compounds .....                                                                                                                                                                           | <b>12</b> |
| <b>Figure S5.</b> Effects of compounds <b>1-7, 11-20</b> on the IDOL mRNA expressions in the HepG2 cells .....                                                                                                                                                               | <b>13</b> |
| <b>Figure S6.</b> Effects of compound <b>13</b> and berberine chloride on the PCSK9 mRNA expressions at a range of concentrations in the HepG2 cells .....                                                                                                                   | <b>13</b> |
| <b>Figure S7.</b> Cell viability test on the HepG2 cell by WST-8 assay of compound <b>13</b> with 20 $\mu$ M concentration .....                                                                                                                                             | <b>14</b> |
| <b>Figure S8.</b> Effects of <b>13</b> on LDLR, PCSK9 and $\beta$ -actin protein expression .....                                                                                                                                                                            | <b>14</b> |
| <b>Figure S9.</b> Raw data for the Western blots.....                                                                                                                                                                                                                        | <b>15</b> |
| <b>Figure S10–S17.</b> 1D and 2D NMR, HREISMS, ECD and IR spectra of sanggenol W ( <b>1</b> ) .....                                                                                                                                                                          | <b>16</b> |
| <b>Figure S18–S25.</b> 1D and 2D NMR, HREISMS, ECD and IR spectra of morusalnol D ( <b>2</b> ) .....                                                                                                                                                                         | <b>20</b> |
| <b>Figure S26–S33.</b> 1D and 2D NMR, HREISMS, ECD and IR spectra of morusalnol E ( <b>3</b> ).....                                                                                                                                                                          | <b>24</b> |
| <b>Figure S34–S41.</b> 1D and 2D NMR, HREISMS, ECD and IR spectra of morusalnol F ( <b>4</b> ) .....                                                                                                                                                                         | <b>28</b> |
| <b>Figure S42–S48.</b> 1D and 2D NMR, HREISMS, and IR spectra of neovanone A ( <b>5</b> ) .....                                                                                                                                                                              | <b>32</b> |
| <b>Figure S49–S55.</b> 1D and 2D NMR, HREISMS, and IR spectra of neovanone B ( <b>6</b> ) .....                                                                                                                                                                              | <b>35</b> |
| <b>Figure S56.</b> HPLC chromatogram for MAC-9C .....                                                                                                                                                                                                                        | <b>39</b> |
| <b>Figure S57.</b> Experimental CD spectra of neovanone A ( <b>5</b> ) and B ( <b>6</b> ) .....                                                                                                                                                                              | <b>39</b> |
| <b>Figure S58–S85.</b> $^1\text{H}$ and $^{13}\text{C}$ NMR spectra of known compounds ( <b>7–20</b> ) .....                                                                                                                                                                 | <b>40</b> |

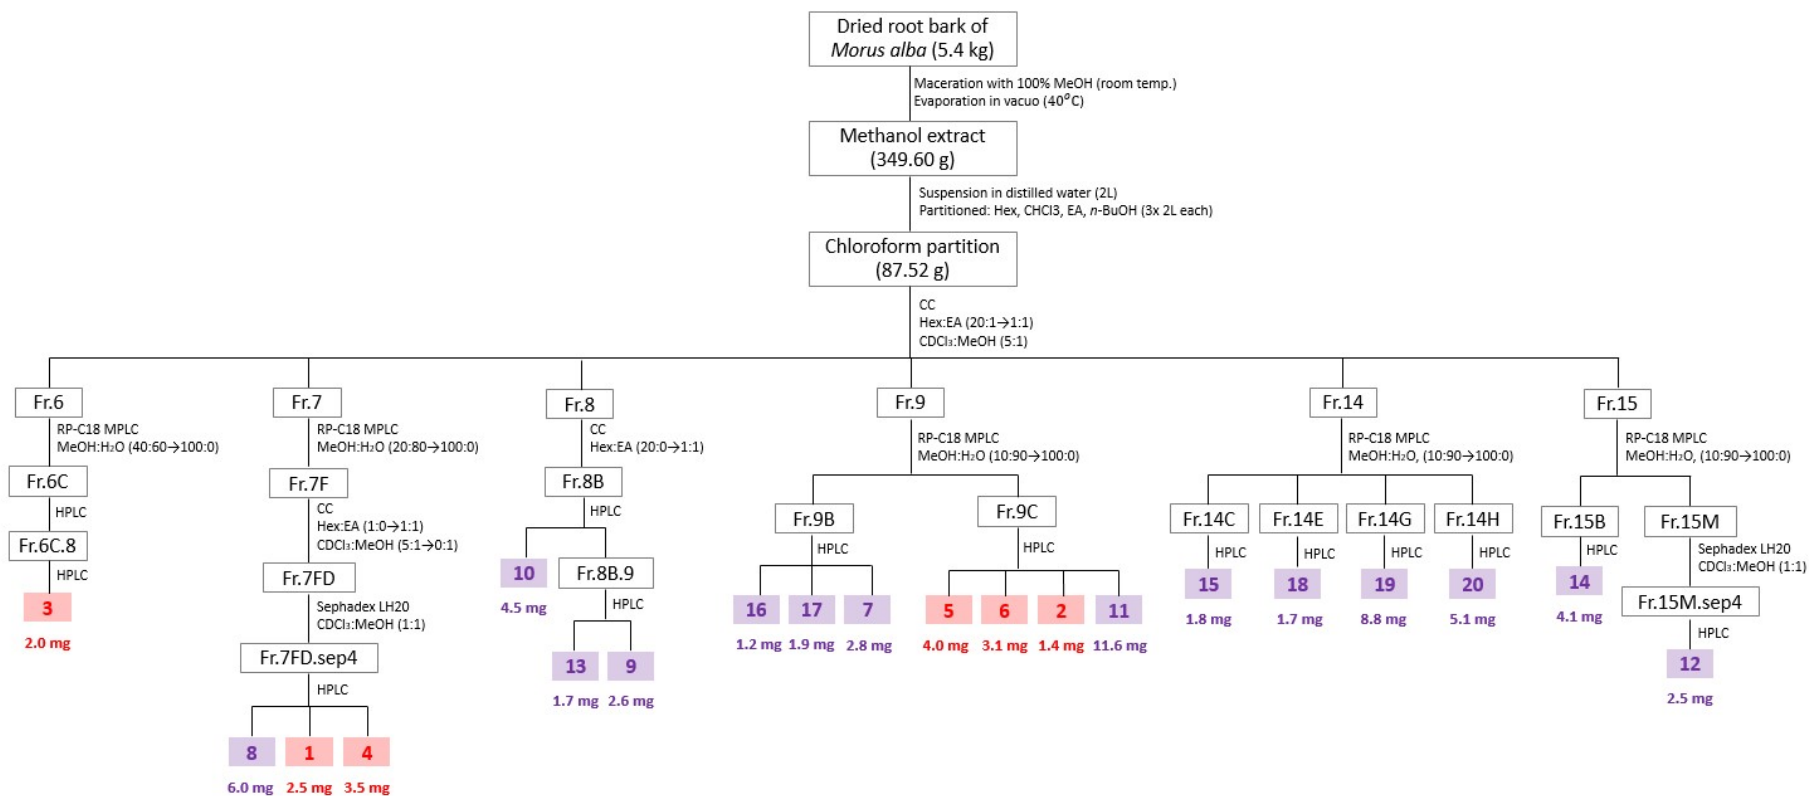

**Scheme 1.** Isolation scheme of compounds from *Morus alba*

## Experimental

### 1. General experimental procedures

Column chromatography was conducted on silica gel (particle size: 40–60  $\mu\text{m}$ , 230-400 mesh, Merck, Darmstadt, Germany). A Biotage Isolera One (Biotage, Uppsala, Sweden) with C18 RP silica gel (Cosmosil, Kyoto, Japan) was used for medium-pressure liquid chromatography (MPLC). High-performance liquid chromatography (HPLC) were performed with Gilson 321 pump and Gilson 172 diode array detector (Gilson, Madison, WI, USA), with aid of two columns; Luna, C18 (S-5  $\mu\text{m}$ , 250 x 100 mm, Phenomenex, CA, USA), and J'sphere ODS-M80, HPLC column (S-4  $\mu\text{m}$ , 250 x 4.6 mm, YMC Co., Ltd., Japan). Mass spectra data were measured using Waters Xevo G2 Q-TOF mass spectrometer, UHPLC-ESI-QTOF-MS (Waters, Medford, MA, USA) and TOF-MS (Agilent, Q-TOF 6530 MS / Agilent, 1290 Infinity) (No. 068) (USA). Nuclear magnetic resonance (NMR) spectra were recorded with JNM-ECA AVANCE 400 and 600 MHz spectrometer (JEOL Ltd., Japan) and Bruker AVANCE 500 MHz (Bruker, USA) and 800 MHz spectrometer (Bruker, Karlsruhe, Germany). Circular dichroism and ultraviolet-visible spectra were measured by Chirascan-Plus Electronic circular dichroism (Applied Photophysics Ltd, Japan). ASCO P-2000 digital polarimeter (JASCO, Tokyo, Japan/JASCO, Easton, MD, USA) was used to measure optical rotation. FT-IR (JASCO, FT/IR-4200) was used to measure infrared spectroscopy. Thin layer chromatography (TLC) analysis was performed on silica gel 60 F<sub>254</sub> and silica gel RP-C<sub>18</sub> plates (Merck, Darmstadt, Germany), and the spots were visualized by spraying anisaldehyde–H<sub>2</sub>SO<sub>4</sub>. Purified water was obtained using Milli-Q system (Waters Corporation, Milford, MA, USA).

### 2. Reagents

Solvents for extraction and isolation (methanol, hexane, chloroform, ethyl acetate, and *n*-butanol), and HPLC grade solvents for isolation [acetonitrile (CH<sub>3</sub>CN), and methanol (MeOH)] were purchased from SK chemical (Seoul, Korea). Solvents for NMR spectroscopy (CDCl<sub>3</sub> and MeOH) were purchased from Cambridge Isotope Laboratories, Inc. (Andover, MA).

### 3. Plant material

The dried barks of root of *Morus alba*, originated from China, were purchased from a Korean market NAUM in March 2021 and were identified by Dr. H.-S. Chae. A voucher specimen (Voucher No. CYWSNU-KP0023) was deposited at the College of Pharmacy, Seoul National University, Republic of Korea.

### 4. Extraction and Isolation

The dried root barks (5.4 Kg) were extracted with 100% methanol (13 L) at room temperature for three times. The crude extract (349.60 g) was obtained after evaporation. The extract was

suspended in distilled water (2 L), then successively partitioned with hexane, chloroform, ethyl acetate, and *n*-butanol (3 x 2 L each). The chloroform-soluble extract (87.52 g, MAC) was fractionated using silica gel column chromatography (6 x 40 cm) starting with a gradient of hexane and ethyl acetate (20:1 to 1:1), followed by chloroform-methanol (5:1) to afford 22 fractions (MAC-1 to MAC-22). Next, several sub-fractions of chloroform fractions were found to actively inhibit PCSK9 (Figure S3) while up-regulating LDLR mRNA expression (Figure S2). These six sub-fractions, ranging from MAC-6 to MAC-9, MAC-14, and MAC-15, were chosen for further isolation work.

The fraction MAC-6 (3.2120 g) was separated by RP-MPLC with MeOH-H<sub>2</sub>O (40:60 to 100:0) to obtain 4 fractions (MAC-6A to MAC-6D). The MAC-6C fraction (97.4 mg) was further separated by preparative HPLC (CH<sub>3</sub>CN-H<sub>2</sub>O (0.1% FA) 85% isocratic, 3 mL/min) to yield 8 sub-fractions (MAC-6C.1 to MAC-6C.8). The MAC-6C.8 (7.3 mg) fraction was purified using prep-HPLC (CH<sub>3</sub>CN-H<sub>2</sub>O (0.1% FA) 80% isocratic, 1 mL/min, 274 nm) to give **3** (2.0 mg, *t<sub>R</sub>* = 31 min).

The MAC-7 fraction (1.3267 g) was separated by RP-MPLC and eluted with MeOH-H<sub>2</sub>O (10:90 to 100:0) to afford 6 fractions (MAC-7A to MAC-7F). The MAC-7F fraction (973.6 mg) was separated using silica gel column chromatography (3 x 19 cm) starting from a gradient of hexane-ethyl acetate (1:0 to 1:1), then increased to chloroform-methanol (5:1), and finished by washing with 100% methanol to obtain 9 sub-fractions (MAC-7A to MAC-7I). The MAC-7FD fraction (528.9 mg) was separated by Sephadex LH-20 column (2 x 47 cm, CHCl<sub>3</sub>:MeOH 1:1) to obtain 5 sub-fractions (MAC-7FD.sep1 to MAC-7FD.sep5). Finally, MAC-7FD.sep4 (40.8 mg) was purified with HPLC (MeOH-H<sub>2</sub>O (0.1% FA) 85% isocratic, 3 mL/min) to obtain **8** (6.0 mg, *t<sub>R</sub>* = 18 min), **1** (2.5 mg, *t<sub>R</sub>* = 22 min) and **4** (3.5 mg, *t<sub>R</sub>* = 36 min).

The MAC-8 fraction (3.0391 g) was chromatographed on a silica gel column (3 x 19 cm) starting with a gradient of hexane-ethyl acetate (20:1 to 1:1), then changed to CH<sub>3</sub>Cl-MeOH (5:1) for wash to obtain 3 sub-fractions (MAC-8A to MAC-8C). MAC-8B (1.1388 g) was further separated using prep-HPLC (MeOH-H<sub>2</sub>O (0.1% FA) 70 to 90%, gradient, 3 mL/min) to yield **10** (4.5 mg, *t<sub>R</sub>* = 56 min) and MAC-8B.9 fraction (15.6 mg, *t<sub>R</sub>* = 60 min), which was further purified using prep-HPLC (MeOH-H<sub>2</sub>O (0.1% FA) 90% isocratic, 3 mL/min) to yield **13** (1.7 mg, *t<sub>R</sub>* = 19 min) and **9** (2.6 mg, *t<sub>R</sub>* = 20 min).

The MAC-9 fraction (4.3474 g) was separated by RP-MPLC eluting with MeOH-H<sub>2</sub>O (10:90 to 100:0) to give 4 sub-fractions (MAC-9A to MAC-9D). The MAC-9B fraction (23.1 mg) was separated using prep-HPLC (CH<sub>3</sub>CN-H<sub>2</sub>O (0.1% FA) 65% isocratic (25 min) then 90% isocratic (13 min), 3 mL/min) to yield **16** (1.2 mg, *t<sub>R</sub>* = 25 min), **17** (1.9 mg, *t<sub>R</sub>* = 34 min) and **7** (2.8 mg, *t<sub>R</sub>* = 39 min). Small proportion (236.1 mg) of MAC-9C fraction (2.2522 g) was separated using prep-HPLC CH<sub>3</sub>CN-H<sub>2</sub>O (0.1% FA) 65% isocratic, 3 mL/min) to obtain **5** (4.0 mg, *t<sub>R</sub>* = 37 min), **6** (3.1 mg, *t<sub>R</sub>* = 39 min), **2** (1.4 mg, *t<sub>R</sub>* = 50 min), and **11** (*t<sub>R</sub>* = 53 min).

The MAC-14 fraction (5.3125 g) was separated by RP-MPLC using gradient MeOH-H<sub>2</sub>O (1:99 to 100:0) to obtain 17 sub-fractions (MAC-14A to MAC-14P, and MAC-14R). All sub-fractions subjected to purification were separated by prep-HPLC (Luna 5 μm C18(2), 250

x 10 mm, 3 mL/min) at different concentration of acetonitrile. The MAC-14C fraction (7.6 mg) was purified with HPLC (CH<sub>3</sub>CN-H<sub>2</sub>O (0.1% FA) 15% isocratic) to obtain **15** (1.8 mg, *t<sub>R</sub>* = 35 min). The MAC-14E fraction (11.0 mg) was purified with HPLC (CH<sub>3</sub>CN-H<sub>2</sub>O (0.1% FA) 25% isocratic) to isolate **18** (1.7 mg, *t<sub>R</sub>* = 38 min). The MAC-14G fraction (40.4 mg) was purified with HPLC (CH<sub>3</sub>CN-H<sub>2</sub>O (0.1% FA) 35% isocratic) to gain **19** (8.8 mg, *t<sub>R</sub>* = 39 min). Finally, the MAC-14H fraction (18.2 mg) was purified with HPLC (CH<sub>3</sub>CN-H<sub>2</sub>O (0.1% FA) 37% isocratic) to obtain **20** (5.1 mg, *t<sub>R</sub>* = 46 min).

The MAC-15 fraction (2.2146 g) was separated by RP-MPLC eluting with MeOH-H<sub>2</sub>O (10:90 to 100:0) to obtain 13 sub-fractions (MAC-15A to MAC-15O). The MAC-15B fraction (36.1 mg) was purified using prep-HPLC (MeOH-H<sub>2</sub>O, 35% isocratic, 3 mL/min) to obtain **14** (4.1 mg, *t<sub>R</sub>* = 20 min). The MAC-15M fraction (940.8 mg) was subjected to separation by Sephadex LH-20 column (2 x 47 cm, CH<sub>3</sub>Cl-MeOH 1:1) to obtain 4 sub-fractions (MAC-15M.sep1 to MAC-15M.sep4). The MAC-15M.sep4 fraction (6.1 mg) was purified using prep-HPLC (MeOH-H<sub>2</sub>O, 50% isocratic, 3 mL/min) to obtain **12** (2.5 mg, *t<sub>R</sub>* = 28 min).

Sanggenol W (**1**): yellow oil; [ $\alpha$ ]<sup>20</sup><sub>D</sub> -40.73 (*c* 0.12, MeOH); ECD (MeOH)  $\lambda_{\max}$  ( $\Delta\epsilon$ ) 196 (-0.84), 217 (+0.78), 270 (-0.46) nm; UV (MeOH)  $\lambda_{\max}$  (log  $\epsilon$ ) 228 (4.69), 271 (4.80) nm; IR (neat)  $\nu_{\max}$  3300, 2973, 1754, 1639, 1453, 1350, 1298, 1158, 1119, 1044, 892, 817, 679 cm<sup>-1</sup>; <sup>1</sup>H and <sup>13</sup>C NMR (CDCl<sub>3</sub>), see Table 1; HRESIMS *m/z* 419.1476 [M - H]<sup>-</sup> (calcd for C<sub>25</sub>H<sub>23</sub>O<sub>6</sub>, 419.1495)

Morusalnol D (**2**): colorless amorphous solid; [ $\alpha$ ]<sup>20</sup><sub>D</sub> -20.01 (*c* 0.14, MeOH); ECD (MeOH)  $\lambda_{\max}$  ( $\Delta\epsilon$ ) 196 (0.57), 222 (+0.98) nm; UV (MeOH)  $\lambda_{\max}$  (log  $\epsilon$ ) 229 (4.43), 287 (4.46) nm; IR (neat)  $\nu_{\max}$  3361, 2924, 1638, 1464, 1350, 1278, 1163, 1096, 834 cm<sup>-1</sup>; <sup>1</sup>H and <sup>13</sup>C NMR (CDCl<sub>3</sub>), see Table 1; HRESIMS *m/z* 489.2296 [M - H]<sup>-</sup> (calcd for C<sub>30</sub>H<sub>33</sub>O<sub>6</sub>, 489.2283)

Morusalnol E (**3**): white amorphous solid; [ $\alpha$ ]<sup>20</sup><sub>D</sub> +64.70 (*c* 0.10, MeOH); ECD (MeOH)  $\lambda_{\max}$  ( $\Delta\epsilon$ ) 230 (+3.15), 295 (-2.32) nm; UV (MeOH)  $\lambda_{\max}$  (log  $\epsilon$ ) 272 (4.63) nm; IR (neat)  $\nu_{\max}$  3354, 2917, 1637, 1450, 1350, 1294, 1159, 1103, 825 cm<sup>-1</sup>; <sup>1</sup>H and <sup>13</sup>C NMR (methanol-*d*<sub>4</sub>), see Table 2; HRESIMS *m/z* 473.2351 [M - H]<sup>-</sup> (calcd for C<sub>30</sub>H<sub>33</sub>O<sub>5</sub>, 473.2333)

Morusalnol F (**4**): yellow amorphous solid; [ $\alpha$ ]<sup>20</sup><sub>D</sub> -3.84 (*c* 0.31, MeOH); ECD (MeOH)  $\lambda_{\max}$  ( $\Delta\epsilon$ ) 195 (-0.76), 219 (+1.12) nm; UV (MeOH)  $\lambda_{\max}$  (log  $\epsilon$ ) 207 (4.51), 227 (4.28), 272 (4.56) nm; IR (neat)  $\nu_{\max}$  3411, 2973, 2925, 2279, 1753, 1638, 1456, 1380, 1301, 1162, 1102, 1037, 896, 817, 661 cm<sup>-1</sup>; <sup>1</sup>H and <sup>13</sup>C NMR (CDCl<sub>3</sub>), see Table 2; HRESIMS *m/z* 489.2304 [M - H]<sup>-</sup> (calcd for C<sub>30</sub>H<sub>33</sub>O<sub>6</sub>, 489.2283)

Neovanone A (**5**): brown amorphous solid; [ $\alpha$ ]<sup>20</sup><sub>D</sub> -32.15 (*c* 0.17, MeOH); ECD (MeOH)  $\lambda_{\max}$  ( $\Delta\epsilon$ ) 232 (+7.88), 287 (-0.85), 312 (+1.80) nm; UV (MeOH)  $\lambda_{\max}$  (log  $\epsilon$ ) 285 (4.47) nm; IR (neat)  $\nu_{\max}$  3219, 2925, 1751, 1638, 1462, 1353, 1290, 1166, 1064, 828, 679 cm<sup>-1</sup>; <sup>1</sup>H and <sup>13</sup>C NMR (methanol-*d*<sub>4</sub>), see Table 3; HRESIMS *m/z* 437.1617 [M - H]<sup>-</sup> (calcd for C<sub>25</sub>H<sub>25</sub>O<sub>7</sub>, 437.1606)

Neovanone B (**6**): brown amorphous solid; [ $\alpha$ ]<sup>20</sup><sub>D</sub> +10.21 (*c* 0.31, MeOH); ECD (MeOH)  $\lambda_{\max}$  ( $\Delta\epsilon$ ) 237 (+1.40), 290 (-1.75), 312 (+2.29), 354 (+1.61) nm; UV (MeOH)  $\lambda_{\max}$  (log  $\epsilon$ ) 284

(4.47) nm; IR (neat)  $\nu_{\max}$  2927, 1753, 1637, 1518, 1350, 1187, 679  $\text{cm}^{-1}$ ;  $^1\text{H}$  and  $^{13}\text{C}$  NMR (methanol- $d_4$ ), see Table 3; HRESIMS  $m/z$  437.1616  $[\text{M} - \text{H}]^-$  (calcd for  $\text{C}_{25}\text{H}_{25}\text{O}_7$ , 437.1606)

### 5. Chemical and Spectral Data for compounds 7–20

Abyssinoflavanone V (**7**): colorless amorphous solid; ECD (MeOH)  $\lambda_{\max}$  ( $\Delta\epsilon$ ) 286 (–15.4), 332 (+3.76) nm; HRESIMS  $m/z$  337.1063  $[\text{M} - \text{H}]^-$  (calcd for  $\text{C}_{20}\text{H}_{17}\text{O}_5$ , 337.1076);  $\text{C}_{20}\text{H}_{18}\text{O}_5$ ;  $^1\text{H}$  NMR ( $\text{CDCl}_3$ , 400 MHz)  $\delta$  12.06 (1H, s), 7.17 (1H, dd,  $J = 2.2, 8.3$  Hz), 7.06 (1H, d,  $J = 2.2$  Hz), 6.81 (1H, d,  $J = 8.3$  Hz), 6.33 (1H, d,  $J = 9.8$  Hz), 5.99 (1H, s), 5.99 (1H, s), 5.66 (1H, d,  $J = 9.8$  Hz), 5.31 (1H, dd,  $J = 3.0, 13.1$  Hz), 3.09 (1H, dd,  $J = 13.1, 17.2$  Hz), 2.77 (1H, dd,  $J = 3.0, 17.2$  Hz) 1.45 (3H, s), 1.45 (3H, s);  $^{13}\text{C}$  NMR ( $\text{CDCl}_3$ , 400 MHz)  $\delta$  28.1, 28.1, 43.2, 77.2, 79.1, 95.5, 96.7, 103.2, 116.6, 121.5, 121.9, 124.4, 127.2, 130.3, 131.5, 153.5, 163.3, 164.4, 164.5, 196.1.

Sanggenol O (**8**): yellow oil; ECD (MeOH)  $\lambda_{\max}$  ( $\Delta\epsilon$ ) 215 (+18.6), 241 (–3.30), 257 (+3.44), 285 (–12.4) nm; HRESIMS  $m/z$  419.1498  $[\text{M} - \text{H}]^-$  (calcd for  $\text{C}_{25}\text{H}_{23}\text{O}_6$ , 419.1495);  $\text{C}_{25}\text{H}_{24}\text{O}_6$ ;  $^1\text{H}$  NMR ( $\text{CDCl}_3$ , 400 MHz)  $\delta$  6.99 (s), 6.67 (1H, d,  $J = 10.0$  Hz), 6.28 (1H, d,  $J = 9.8$  Hz), 5.99 (1H, s, overlapped), 5.99 (1H, s, overlapped), 5.66 (1H, dd,  $J = 3.2, 13.3$  Hz), 5.59 (1H, d,  $J = 10.0$  Hz), 5.51 (1H, d,  $J = 9.8$  Hz), 2.99 (1H, dd,  $J = 13.3, 17.3$  Hz), 2.79 (1H, dd,  $J = 3.2, 17.3$  Hz), 1.43 (3H, s), 1.43 (3H, s), 1.42 (3H, s), 1.39 (3H, s);  $^{13}\text{C}$  NMR ( $\text{CDCl}_3$ , 400 MHz)  $\delta$  27.8, 28.0, 28.2, 28.2, 42.5, 74.1, 76.8, 77.2, 95.4, 96.5, 103.0, 110.0, 114.6, 116.6, 117.9, 122.1, 123.3, 128.3, 129.2, 148.9, 150.2, 163.9, 164.4, 164.5, 197.0.

Cyclomorusin (**9**): yellow amorphous solid; HRESIMS  $m/z$  417.1328  $[\text{M} - \text{H}]^-$  (calcd for  $\text{C}_{25}\text{H}_{21}\text{O}_6$ , 417.1338);  $\text{C}_{25}\text{H}_{22}\text{O}_6$ ;  $^1\text{H}$  NMR (methanol- $d_4$ , 400 MHz)  $\delta$  7.65 (1H, d,  $J = 8.4$  Hz), 6.82 (1H, d,  $J = 9.9$  Hz), 6.54 (1H, dd,  $J = 2.4, 8.4$  Hz), 6.31 (1H, d,  $J = 2.4$  Hz), 6.15 (1H, d,  $J = 9.3$  Hz), 6.13 (1H, s), 5.72 (1H, d,  $J = 9.9$  Hz), 5.41 (1H, d,  $J = 9.3$  Hz), 1.94 (3H, s), 1.70 (3H, s), 1.46 (3H, s), 1.46 (3H, s);  $^{13}\text{C}$  NMR (methanol- $d_4$ , 400 MHz)  $\delta$  18.7, 26.0, 28.5, 28.5, 70.7, 79.3, 100.8, 102.8, 105.1, 106.4, 108.6, 110.4, 111.3, 115.6, 122.4, 126.4, 129.1, 140.0, 152.5, 157.3, 159.7, 160.5, 162.8, 165.1, 179.8.

Cycloaltilisins 7 (**10**): yellow amorphous solid; ECD (MeOH)  $\lambda_{\max}$  ( $\Delta\epsilon$ ) 238 (+3.61), 293 (–3.55) nm; HRESIMS  $m/z$  405.1708  $[\text{M} - \text{H}]^-$  (calcd for  $\text{C}_{25}\text{H}_{25}\text{O}_5$ , 405.1702);  $\text{C}_{25}\text{H}_{26}\text{O}_5$ ;  $^1\text{H}$  NMR ( $\text{CDCl}_3$ , 400 MHz)  $\delta$  12.29 (1H, br s), 7.32 (1H, d,  $J = 7.4$  Hz), 7.32 (1H, d,  $J = 7.4$  Hz), 6.88 (1H, d,  $J = 7.4$  Hz), 6.88 (1H, d,  $J = 7.4$  Hz), 6.66 (1H, d,  $J = 10.2$  Hz), 5.94 (1H, s), 5.44 (1H, d,  $J = 10.2$  Hz), 5.33 (1H, dd,  $J = 2.9, 13.0$  Hz), 5.08 (1H, m), 3.07 (1H, dd,  $J = 13.0, 17.1$  Hz), 2.77 (1H, dd,  $J = 2.9, 17.1$  Hz), 2.06 (2H, m), 1.75–1.62 (2H, m, overlaid), 1.66 (3H, s), 1.57 (3H, s), 1.40 (3H, d,  $J = 2.2$  Hz);  $^{13}\text{C}$  NMR ( $\text{CDCl}_3$ , 400 MHz)  $\delta$  17.7, 22.6, 25.7, 41.7, 43.2, 78.9, 80.9, 96.0, 102.7, 102.8, 115.7, 115.7, 115.8, 123.8, 125.1, 127.0, 128.0, 130.6, 132.0, 156.1, 158.4, 162.5, 162.6, 196.0.

Sanggenol P (**11**): yellow amorphous solid; ECD (MeOH)  $\lambda_{\max}$  ( $\Delta\epsilon$ ) 289 (–2.13) nm; HRESIMS  $m/z$  491.2441  $[\text{M} - \text{H}]^-$  (calcd for  $\text{C}_{30}\text{H}_{35}\text{O}_6$ , 491.2439);  $\text{C}_{30}\text{H}_{36}\text{O}_6$ ;  $^1\text{H}$  NMR (methanol- $d_4$ , 400 MHz)  $\delta$  6.96 (1H, s), 5.91 (1H, d,  $J = 2.1$  Hz), 5.87 (1H, d,  $J = 2.1$  Hz), 5.67

(1H, dd,  $J = 3.0, 12.4$  Hz), 5.28 (1H, t,  $J = 7.1, 7.1$  Hz), 5.19 (1H, t,  $J = 6.9, 6.9$  Hz), 5.06 (1H, t,  $J = 7.1, 7.1$  Hz), 3.41 (2H, d,  $J = 6.9$  Hz), 3.25 (2H, d,  $J = 7.1$  Hz), 3.06 (1H, dd,  $J = 12.4, 17.2$  Hz), 2.73 (1H, dd,  $J = 3.0, 17.2$  Hz), 2.07 (2H, m), 1.99 (2H, t,  $J = 7.4, 7.4$  Hz), 1.79 (3H, s), 1.74 (3H, s), 1.69 (3H, s), 1.62 (3H, s), 1.57 (3H, s);  $^{13}\text{C}$  NMR (methanol- $d_4$ , 400 MHz)  $\delta$  16.4, 17.8, 17.9, 23.8, 25.9, 26.0, 27.7, 29.3, 40.9, 43.2, 76.7, 96.3, 97.0, 103.4, 118.7, 119.6, 122.1, 124.0, 124.0, 125.4, 125.5, 132.3, 133.5, 136.5, 151.8, 154.4, 165.2, 165.5, 168.3, 198.3.

Morachalcone A (**12**): golden powder; HRESIMS  $m/z$  339.1237  $[\text{M} - \text{H}]^-$  (calcd for  $\text{C}_{20}\text{H}_{19}\text{O}_5$ , 339.1232);  $\text{C}_{20}\text{H}_{20}\text{O}_5$ ;  $^1\text{H}$  NMR (methanol- $d_4$ , 400 MHz)  $\delta$  8.08 (1H, d,  $J = 15.5$  Hz), 7.75 (1H, d,  $J = 8.8$  Hz), 7.71 (1H, d,  $J = 15.5$  Hz), 7.51 (1H, d,  $J = 8.3$  Hz), 6.40 (1H, d,  $J = 8.8$  Hz), 6.35 (1H, dd,  $J = 2.4, 8.3$  Hz), 6.34 (1H, d,  $J = 2.4$  Hz), 5.22 (1H, t,  $J = 7.3, 7.3$  Hz), 1.78 (3H, s), 1.66 (3H, s);  $^{13}\text{C}$  NMR (methanol- $d_4$ , 400 MHz)  $\delta$  18.0, 22.6, 26.0, 103.6, 108.1, 109.1, 114.7, 115.7, 116.6, 117.8, 123.8, 130.2, 131.8, 132.3, 141.8, 160.8, 162.8, 163.4, 165.1, 194.4.

Betulinic acid (**13**): white amorphous powder; HRESIMS  $m/z$  455.3542  $[\text{M} - \text{H}]^-$  (calcd for  $\text{C}_{30}\text{H}_{47}\text{O}_3$ , 455.3531);  $\text{C}_{30}\text{H}_{48}\text{O}_3$ ;  $^1\text{H}$  NMR ( $\text{CDCl}_3$ , 400 MHz)  $\delta$  4.76 (1H, s), 4.63 (1H, s), 3.19 (1H, dd,  $J = 5.0, 11.2$  Hz), 3.01 (1H, m), 1.70 (3H, s), 0.99 (3H, s), 0.98 (3H, s), 0.95 (3H, s), 0.84 (3H, s), 0.77 (3H, s);  $^{13}\text{C}$  NMR ( $\text{CDCl}_3$ , 400 MHz)  $\delta$  14.7, 15.3, 16.0, 16.1, 18.3, 19.4, 20.9, 25.7, 27.9, 29.7, 29.7, 30.6, 32.2, 34.3, 34.3, 37.2, 38.4, 38.7, 38.9, 40.7, 42.4, 45.9, 49.3, 50.5, 55.4, 56.3, 79.0, 109.7, 142.6, 178.6.

Scopoletin (**14**): yellow powder; HRESIMS  $m/z$  191.0344  $[\text{M} - \text{H}]^-$  (calcd for  $\text{C}_{10}\text{H}_7\text{O}_4$ , 191.0344);  $\text{C}_{10}\text{H}_8\text{O}_4$ ;  $^1\text{H}$  NMR (methanol- $d_4$ , 400 MHz)  $\delta$  7.86 (1H, d,  $J = 9.4$  Hz), 7.10 (1H, s), 6.76 (1H, s), 6.20 (1H, d,  $J = 9.4$  Hz), 3.90 (3H, s);  $^{13}\text{C}$  NMR (methanol- $d_4$ , 400 MHz)  $\delta$  164.2, 153.1, 151.6, 147.2, 146.2, 112.5, 112.5, 109.9, 104.0, 56.4.

Umbelliferone (**15**): white amorphous solid; HRESIMS  $m/z$  161.0239  $[\text{M} - \text{H}]^-$  (calcd for  $\text{C}_9\text{H}_5\text{O}_3$ , 161.0244);  $\text{C}_9\text{H}_6\text{O}_3$ ;  $^1\text{H}$  NMR (methanol- $d_4$ , 400 MHz)  $\delta$  7.85 (1H, d,  $J = 9.5$  Hz), 7.45 (1H, d,  $J = 8.5$  Hz), 6.79 (1H, dd,  $J = 2.3, 8.5$  Hz), 6.70 (1H, d,  $J = 2.3$  Hz), 6.18 (1H, d,  $J = 9.5$  Hz);  $^{13}\text{C}$  NMR (methanol- $d_4$ , 600 MHz)  $\delta$  103.5, 112.2, 113.2, 114.6, 130.7, 146.1, 157.3, 163.3, 163.8.

Morusalfuran E (**16**): white amorphous solid; HRESIMS  $m/z$  269.0808  $[\text{M} - \text{H}]^-$  (calcd for  $\text{C}_{16}\text{H}_{13}\text{O}_4$ , 269.0814);  $\text{C}_{16}\text{H}_{14}\text{O}_4$ ;  $^1\text{H}$  NMR ( $\text{CDCl}_3$ , 400 MHz)  $\delta$  7.44 (1H, d,  $J = 8.6$  Hz), 7.06 (1H, d,  $J = 2.2$  Hz), 6.96 (1H, t,  $J = 2.0, 2.0$  Hz), 6.93 (1H, s), 6.90 (1H, t,  $J = 2.0, 2.0$  Hz), 6.87 (1H, dd,  $J = 2.2, 8.6$  Hz), 6.39 (1H, t,  $J = 2.0, 2.0$  Hz), 3.88 (3H, s), 3.86 (3H, s);  $^{13}\text{C}$  NMR ( $\text{CDCl}_3$ , 400 MHz)  $\delta$  55.5, 55.8, 95.9, 101.6, 101.9, 102.7, 104.1, 112.1, 121.1, 122.4, 132.8, 154.6, 155.9, 156.9, 158.2, 161.3.

Sangganofuran B (**17**): light brown amorphous solid; HRESIMS  $m/z$  323.1280  $[\text{M} - \text{H}]^-$  (calcd for  $\text{C}_{20}\text{H}_{19}\text{O}_4$ , 323.1283);  $\text{C}_{20}\text{H}_{20}\text{O}_4$ ;  $^1\text{H}$  NMR ( $\text{CDCl}_3$ , 400 MHz)  $\delta$  7.42 (1H, d,  $J = 8.5$  Hz), 7.04 (1H, d,  $J = 2.5$  Hz), 6.88 (1H, s), 6.88 (1H, s), 6.87 (1H, dd,  $J = 2.5, 8.5$  Hz), 6.86 (1H, s), 5.29 (1H, t,  $J = 7.1, 7.1$  Hz), 3.87 (3H, s), 3.45 (2H, d,  $J = 7.1$  Hz), 1.85 (3H, s), 1.78 (3H, s);  $^{13}\text{C}$  NMR ( $\text{CDCl}_3$ , 400 MHz)  $\delta$  18.0, 22.6, 25.8, 55.8, 95.9, 101.2, 104.5, 104.5, 112.0, 113.7, 121.0, 121.2, 122.5, 129.9, 135.8, 154.6, 155.3, 155.3, 155.8, 158.1.



Moracin M (**18**): white amorphous solid; HRESIMS  $m/z$  241.0513 [M – H]<sup>-</sup> (calcd for C<sub>14</sub>H<sub>9</sub>O<sub>4</sub>, 241.0506); C<sub>14</sub>H<sub>10</sub>O<sub>4</sub>; <sup>1</sup>H NMR (methanol-*d*<sub>4</sub>, 400 MHz)  $\delta$  7.35 (1H, d,  $J$  = 8.4 Hz), 6.91 (1H, br s), 6.89 (1H, d,  $J$  = 2.1 Hz), 6.75 (1H, d,  $J$  = 2.2 Hz), 6.75 (1H, dd,  $J$  = 2.2 Hz), 6.73 (1H, dd,  $J$  = 2.1, 8.4 Hz) 6.24 (1H, t,  $J$  = 2.2, 2.2 Hz); <sup>13</sup>C NMR (methanol-*d*<sub>4</sub>, 400 MHz)  $\delta$  98.5, 102.2, 103.6, 104.0, 104.0, 113.3, 122.1, 123.1, 133.9, 156.2, 156.9, 157.3, 160.0, 160.0.

Moracin B (**19**): light brown amorphous solid; HRESIMS  $m/z$  285.0758 [M – H]<sup>-</sup> (calcd for C<sub>16</sub>H<sub>13</sub>O<sub>4</sub>, 285.0768); C<sub>16</sub>H<sub>14</sub>O<sub>4</sub>; <sup>1</sup>H NMR (methanol-*d*<sub>4</sub>, 400 MHz)  $\delta$  7.14 (1H, s), 6.95 (1H, s), 6.92 (1H, s), 6.85 (1H, d, overlapped), 6.85 (1H, d, overlapped), 6.33 (1H, t,  $J$  = 2.2, 2.2 Hz), 3.92 (3H, s), 3.81 (3H, s); <sup>13</sup>C NMR (methanol-*d*<sub>4</sub>, 400 MHz)  $\delta$  55.7, 56.7, 95.9, 102.1, 102.3, 102.5, 104.9, 106.2, 123.0, 133.9, 144.8, 148.3, 150.6, 156.3, 160.0, 162.7.

Moracin S (**20**): colorless amorphous solid; HRESIMS  $m/z$  309.1123 [M – H]<sup>-</sup> (calcd for C<sub>19</sub>H<sub>17</sub>O<sub>4</sub>, 309.1132); C<sub>19</sub>H<sub>18</sub>O<sub>4</sub>; <sup>1</sup>H NMR (methanol-*d*<sub>4</sub>, 400 MHz)  $\delta$  7.16 (1H, d,  $J$  = 8.3 Hz), 6.89 (1H, s), 6.78 (1H, d,  $J$  = 2.2 Hz), 6.78 (1H, d,  $J$  = 2.2 Hz), 6.72 (1H, d,  $J$  = 8.3 Hz), 6.24 (1H, t,  $J$  = 2.2, 2.2 Hz), 5.41 (1H, t,  $J$  = 7.3, 7.3 Hz), 3.59 (2H, d,  $J$  = 7.3 Hz), 1.89 (3H, s), 1.69 (3H, s); <sup>13</sup>C NMR (methanol-*d*<sub>4</sub>, 400 MHz)  $\delta$  18.2, 23.7, 26.0, 102.6, 103.5, 104.0, 104.0, 112.7, 113.2, 119.0, 123.0, 123.6, 132.4, 134.1, 153.9, 155.9, 156.0, 160.0, 160.0.

## 6. Cell culture

The HepG2 human hepatocellular liver cell line was obtained from the Korea Research Institute of Bioscience and Biotechnology (South Korea) and grown in Dulbecco's Modified Eagle's Medium (DMEM) containing 10% fetal bovine serum (FBS) and 100 U/mL penicillin/streptomycin sulfate. Cells were incubated in a humidified 5% CO<sub>2</sub> atmosphere at 37 °C. DMEM, penicillin/streptomycin, and FBS were purchased from Hyclone (Logan, USA).

## 7. Cell viability test

Cell viability test was performed by WST plus-8 kit (GenDEPOT, USA) according to the manufacturer's instructions. Briefly, 5 x 10<sup>3</sup> human HepG2 cells were seeded in 96 well culture plate on the day before sample treatment. The compounds dissolved in DMSO were diluted to a concentration of 10  $\mu$ M or 20  $\mu$ M in DMEM without FBS for serum starvation. After treatment, cells were incubated for 24 hr for the WST-8 cell viability test.

## 8. Quantitative Real-time PCR

Total RNA was extracted from HepG2 treated with compounds using TRI Reagent<sup>®</sup> (Genbiotech, Argentina) in compliance to the manufacturer's instructions. The complementary DNA (cDNA) was synthesized from total RNA using Maxima First Strand cDNA Synthesis Kit (ThermoFisher Scientific, USA). Real time PCR for mRNA quantification was performed with TB Green<sup>®</sup> Premix Ex Taq<sup>™</sup> II (TaKaRa Biotechnology, China). The mRNA expression

was normalized to the GAPDH and calculated using the  $2^{-\Delta\Delta Ct}$  method. The human primers were the following (5' to 3'): GAPDH: GTCTCCTCTGACTTCAACAGCG (forward), ACCACCCTGTTGCTGTAGCCAA (reverse); LDLR: GTGCTCCTCGTCTTCCTTTG (forward), TAGCTGTAGCCGTCCTGGTT (reverse), PCSK9: GACACCAGCATACAGAGTGAC (forward), GTGCCATGACTGTCACACTTGC (reverse); IDOL(MYLIP): ACGGTCACCAAGGAATCTGGGA (forward), CCTTCAAGTCACGGCTATACTGC. Gene-specific primers were custom-synthesized by Bioneer (Daejeon, Korea).

## **9. Western blot**

HepG2 cells were lysed in RIPA buffer containing Pierce<sup>TM</sup> Protease and Phosphatase Inhibitor Mini Tablets (ThermoFisher Scientific, USA) on ice for 10 min. Cell lysates were centrifuged at 14,000 rpm for 15 min at 4 °C, and supernatants were quantified using the Protein assay reagent A, B (Bio-Rad, USA). Proteins were separated by electrophoresis on a 10% sodium dodecyl sulfate polyacrylamide gel (SDS-PAGE) and were transferred onto polyvinylidene difluoride (PVDF) membrane. The membrane was treated with 5% skimmed milk for 1 h and incubated overnight at 4 °C with primary antibodies in 3% bovine serum albumin (BSA). After washing with Tris-buffered saline with 0.1% Tween 20 (TBST), the membrane was incubated with the HRP-conjugated secondary antibody (1:5000) for 1 h at room temperature. The band images were acquired using a ChemiDoc Imaging system (Bio-Rad, USA) using SuperSignal<sup>TM</sup> West Pico PLUS Chemiluminescent Substrate (ThermoFisher Scientific, USA) or Immobilon® Western Chemiluminescent HRP Substrate (Millipore, USA).

## **10. ELISAs**

Secreted PCSK9 level in culture medium of cells were measured using a Human Proprotein Convertase 9/PCSK9 ELISA kits (RayBiotech, USA) in accordance to the manufacturer's instructions. Color development at 450 nm was then measured using an automated microplate ELISA reader. In addition, a standard curve was generated for each assay plate by measuring the absorbance of serial dilutions of recombinant human PCSK9 at 450 nm.

## **11. Statistical Analysis**

Data from the experiments are presented as the mean  $\pm$  S.E.M. The level of statistical significance was determined by one-way analysis of variance (ANOVA) and Dunnett's t-test for multiple comparisons. P values less than 0.05 were considered significant.

Data from the experiments are presented as the mean  $\pm$  S.E.M. The level of statistical significance was determined by one-way analysis of variance (ANOVA) and Dunnett's t-test for multiple comparisons. P values less than 0.05 were considered significant.

**Figure S1.** Effects of methanol extract (MAT), *n*-hexane fraction (MAH), chloroform fraction (MAC), ethyl acetate fraction (MAE), *n*-butanol fraction (MAB) and water fraction (MAW) of *Morus alba* on the LDLR and PCSK9 mRNA expressions in the HepG2 cells. **(A)** The expression of LDLR mRNA was assayed by qRT-PCR in cells treated with 40 µg/ml concentration of extract and fractions of *Morus alba*. **(B)** The expression of PCSK9 mRNA was assayed by qRT-PCR in cells treated with 40 µg/ml concentration of extract and fractions of *Morus alba*.

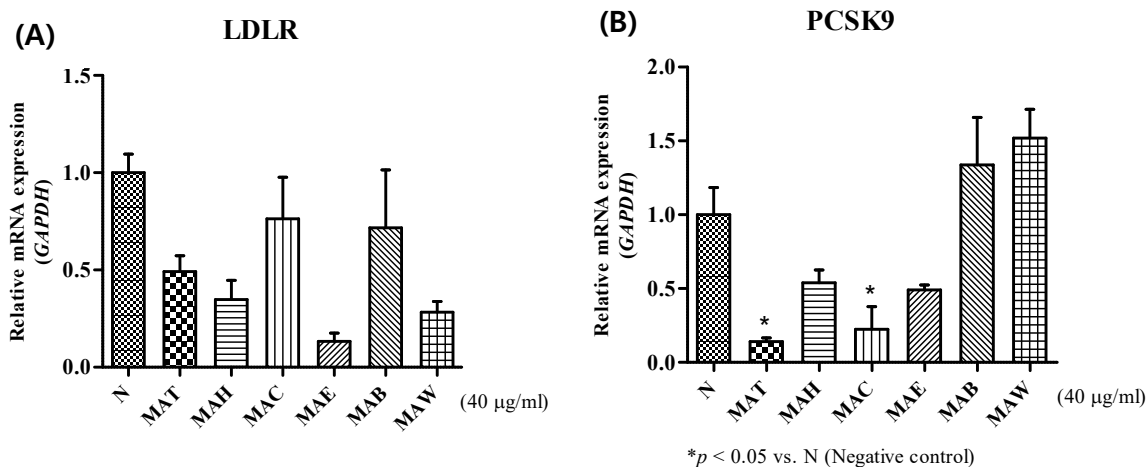

**Figure S2.** Effects of chloroform subfractions on LDLR mRNA expression in the HepG2 cells. Each subfraction was treated with 40 µg/ml concentration and MAC-10 to 13 were excluded due to their cytotoxicity.

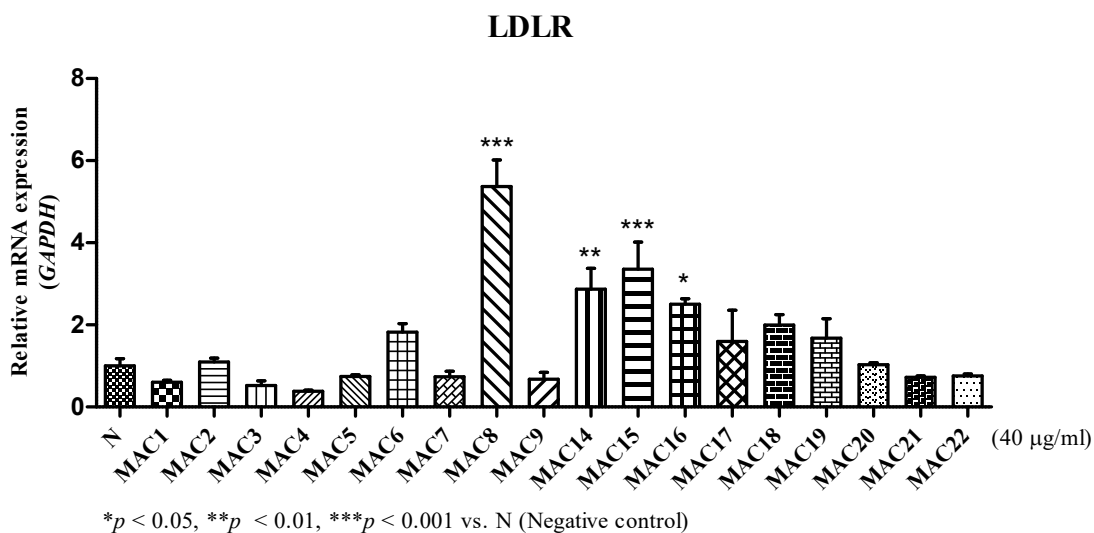

**Figure S3.** Effects of chloroform subfractions on PCSK9 mRNA expression in the HepG2 cells. Each subfraction was treated with 40  $\mu\text{g/ml}$  concentration and MAC-10 to 13 were excluded due to their cytotoxicity.

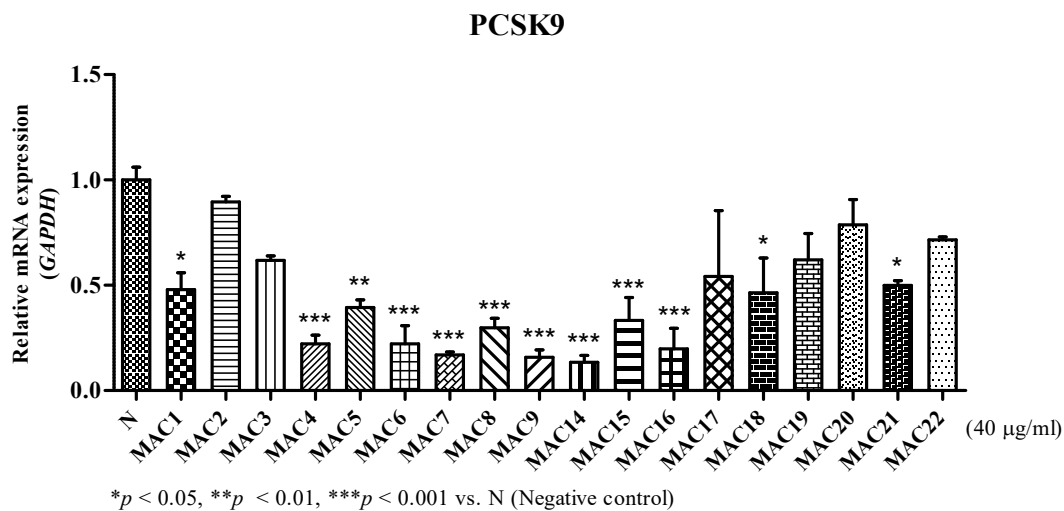

**Figure S4.** Cell viability test on the HepG2 cell by WST-8 assay of isolated compounds.

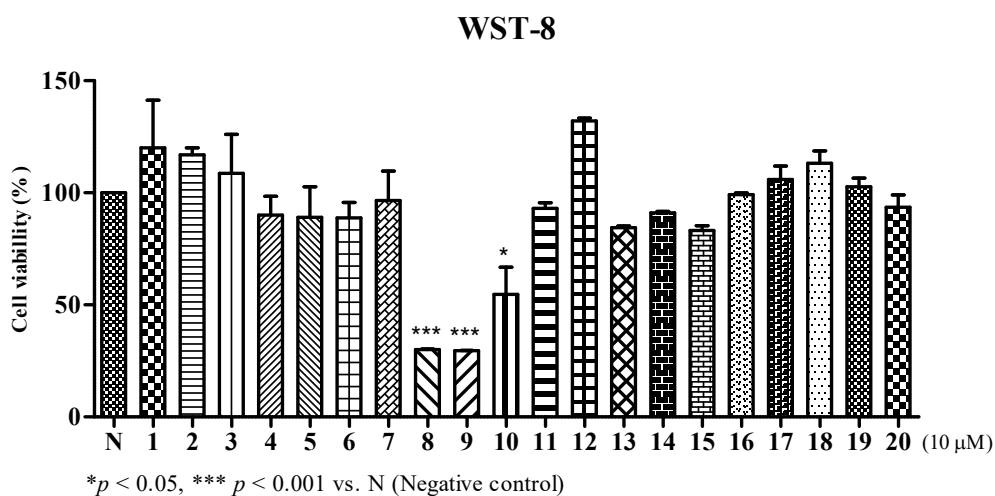

**Figure S5.** Effects of compounds **1-7, 11-20** on the IDOL mRNA expressions in the HepG2 cells.

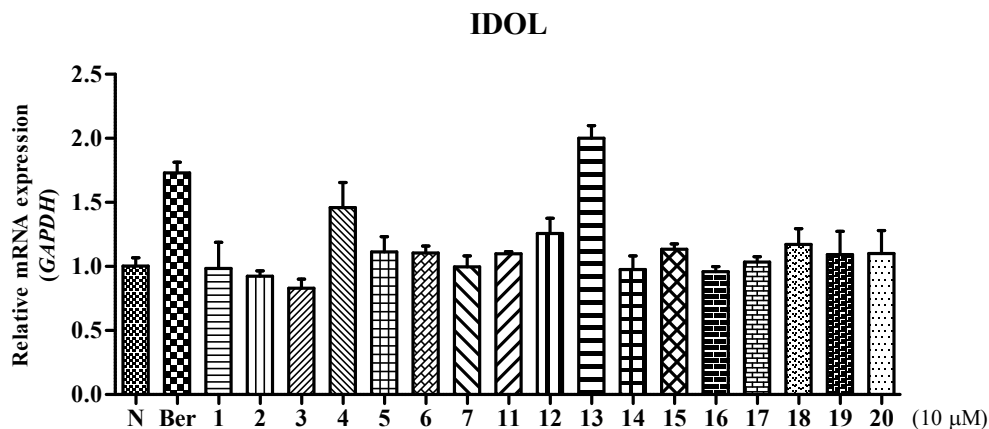

**Figure S6.** Effects of compound **13** and berberine chloride on the PCSK9 mRNA expressions at a range of concentrations in the HepG2 cells. **(A)** The expression of PCSK9 mRNA was assayed by qRT-PCR in cells treated with various range of compound **13**. **(B)** The expression of PCSK9 mRNA was assayed by qRT-PCR in cells treated with various range of berberine chloride.

Cell viability test on the HepG2 cell by WST-8 assay of compound **13** with 20 μM concentration.

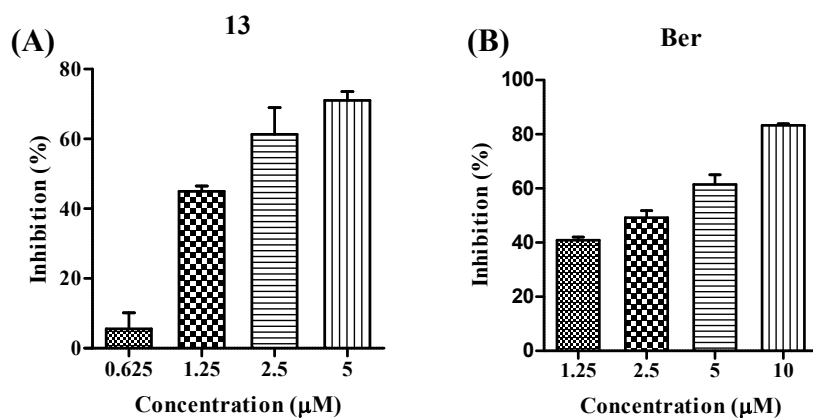

**Figure S7.** Cell viability test on the HepG2 cell by WST-8 assay of compound **13** with 20  $\mu$ M concentration.

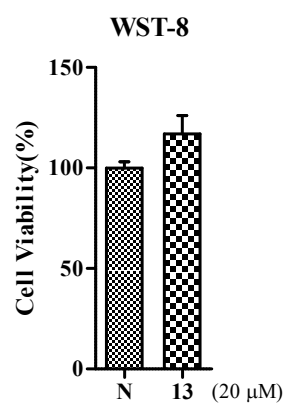

**Figure S8.** Effects of **13** on LDLR, PCSK9 and  $\beta$ -actin protein expression in HepG2 cells. The expressions of the proteins were examined by western blot analysis.

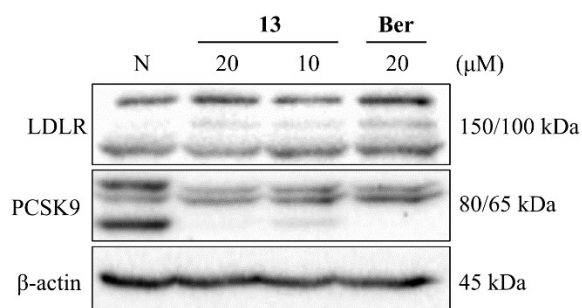

**Figure S9.** Raw data for the Western blots. (A, C, E) Raw data for Figure 4. (B, D, F) Raw data for Figure S8.

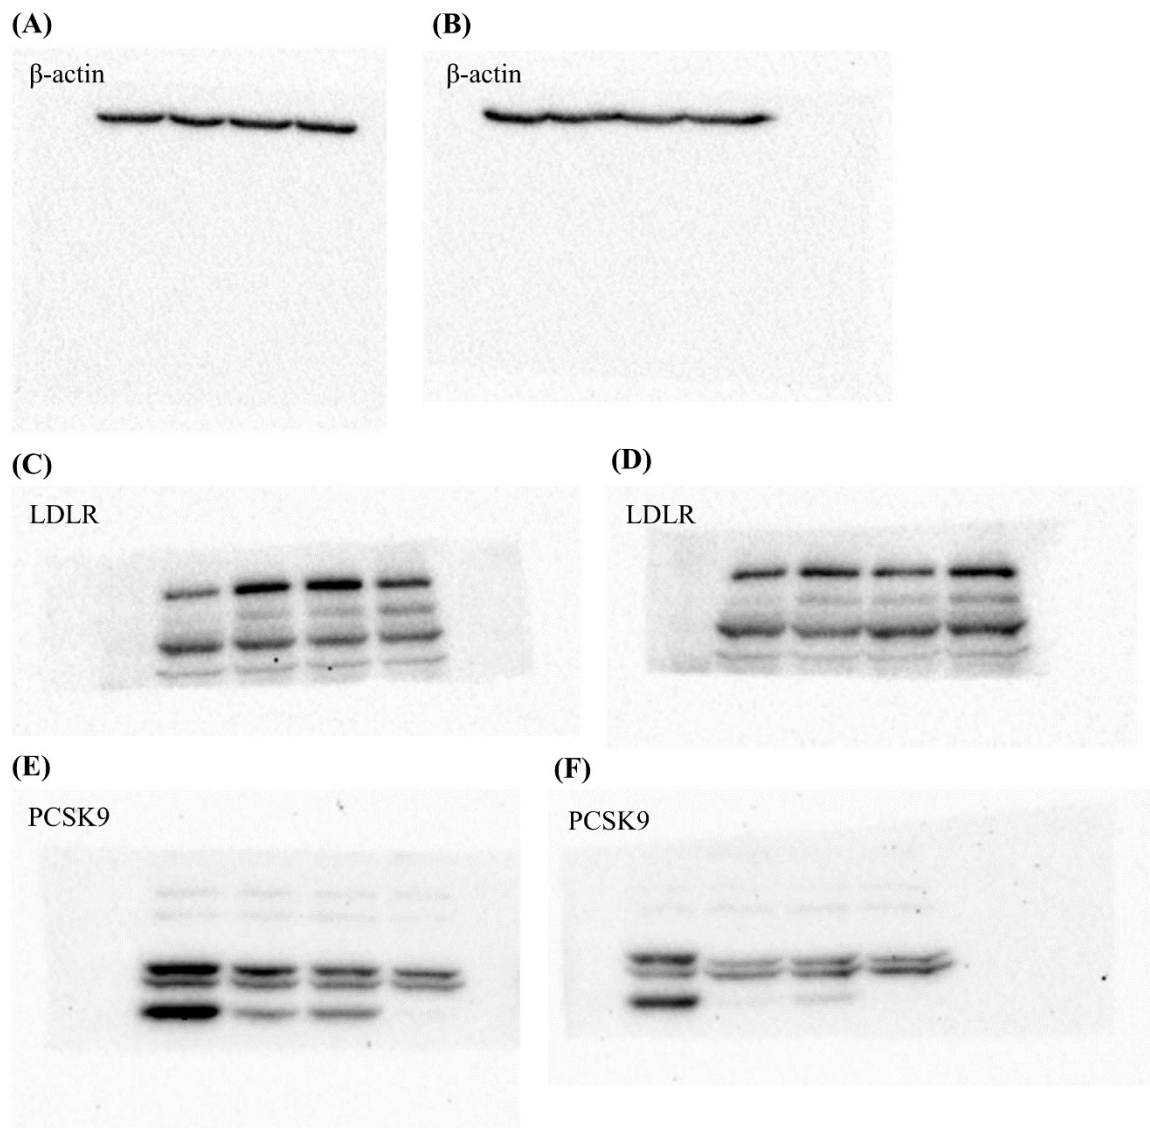

Figure S10–S17. 1D and 2D NMR, MS, and IR spectra of sanggenol W (1)

Figure S10. <sup>1</sup>H NMR spectrum of sanggenol W (1) in CDCl<sub>3</sub>

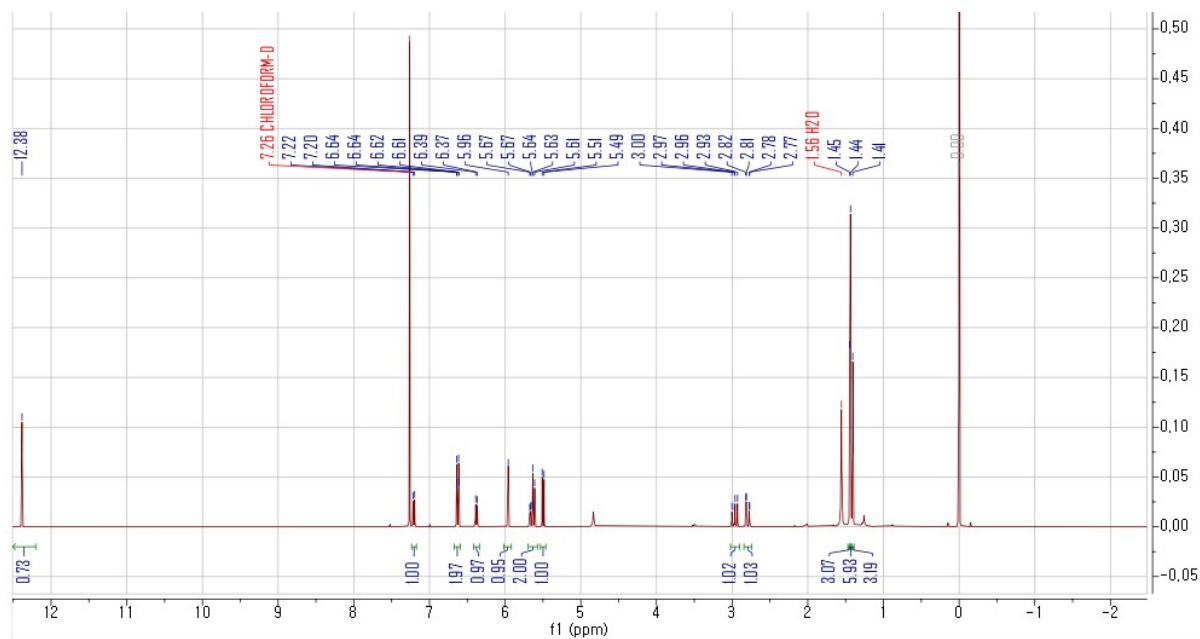

Figure S11. <sup>13</sup>C NMR spectrum of sanggenol W (1) in CDCl<sub>3</sub>

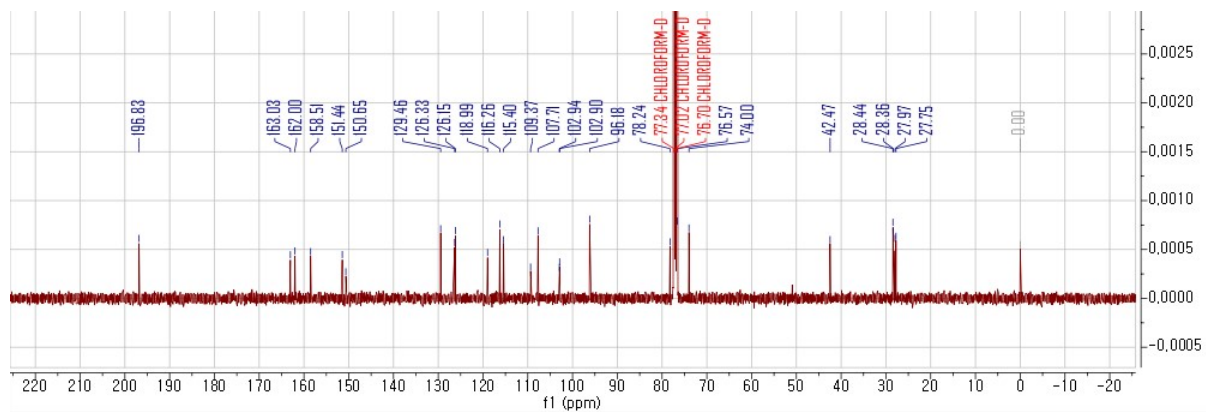



**Figure S12.** HSQC spectrum of sanggenol W (1) in CDCl<sub>3</sub>

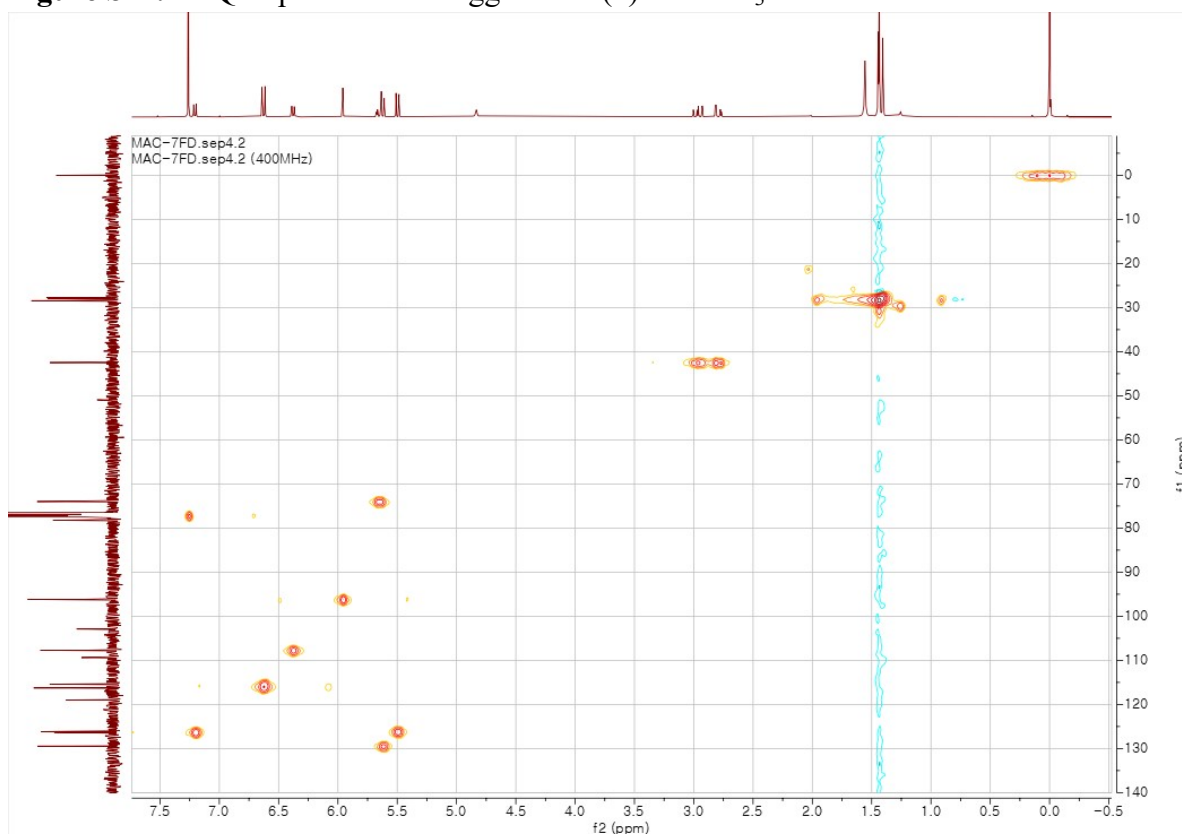

**Figure S13.** COSY spectrum of sanggenol W (1) in CDCl<sub>3</sub>

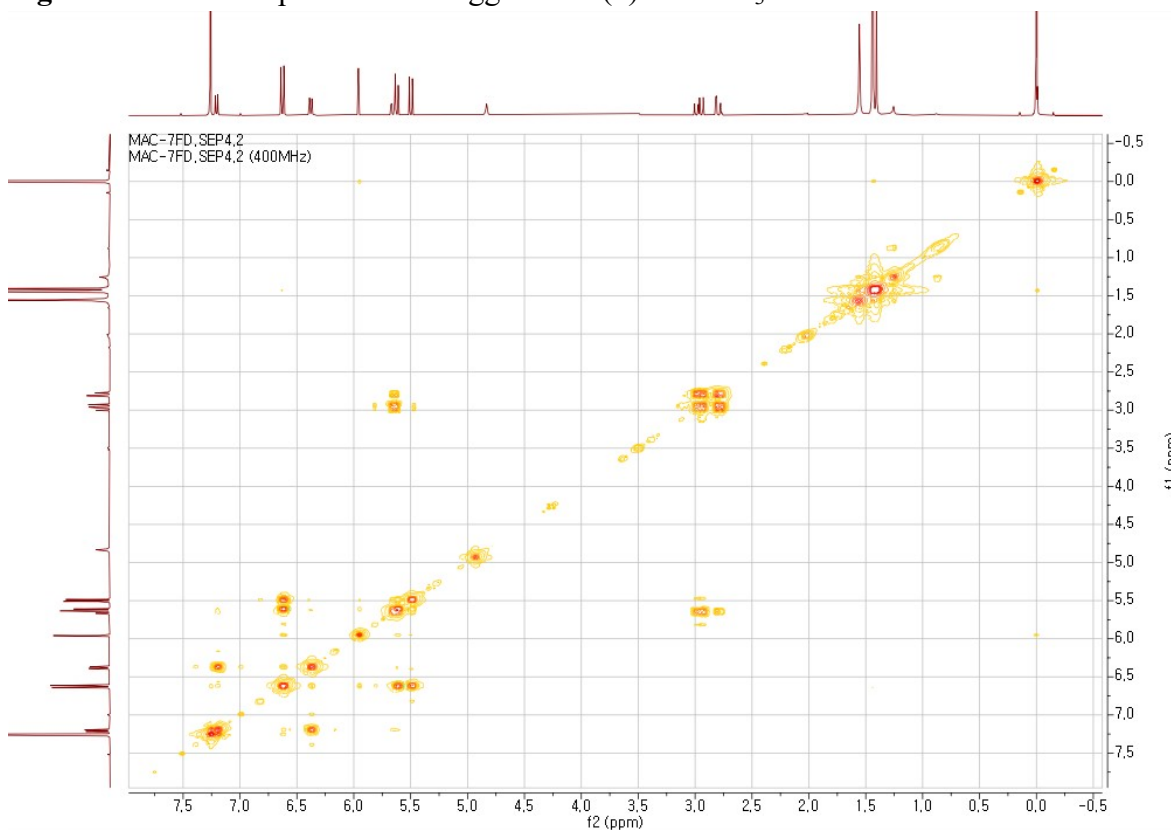

**Figure S14.** HMBC spectrum of sanggenol W (1) in CDCl<sub>3</sub>

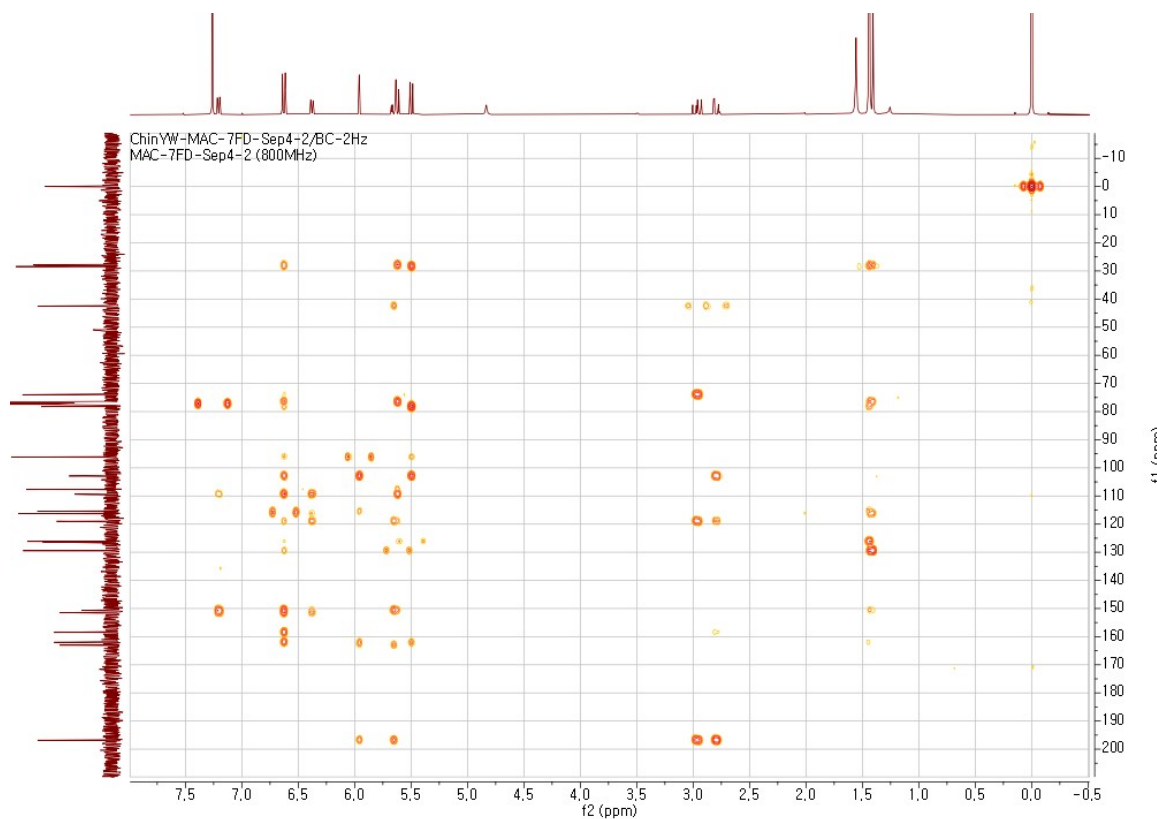

**Figure S15.** HRESIMS spectrum of sanggenol W (1)

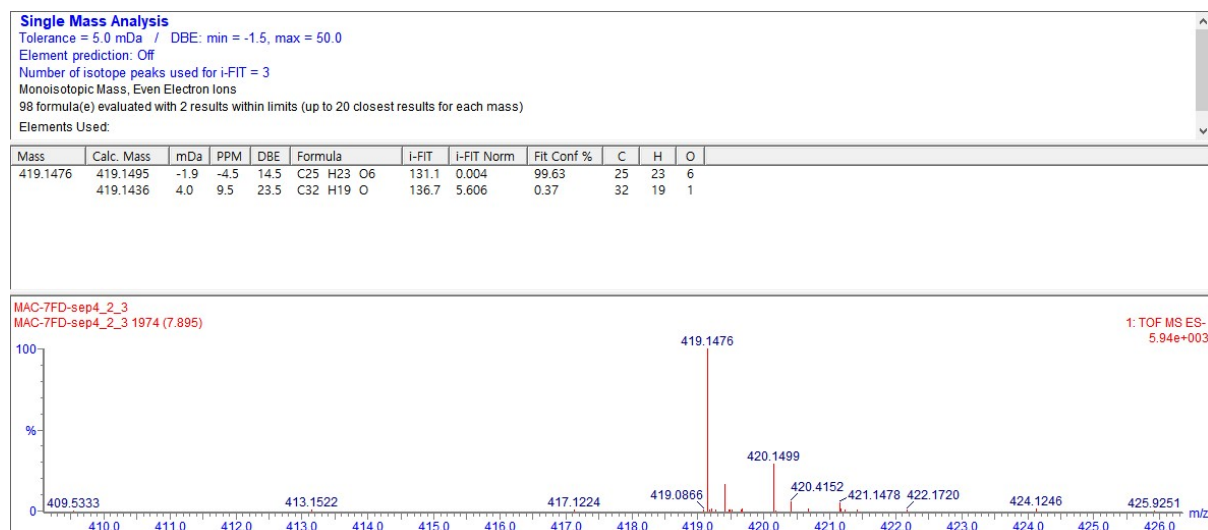

Figure S16. ECD spectrum of sanggenol W (1)

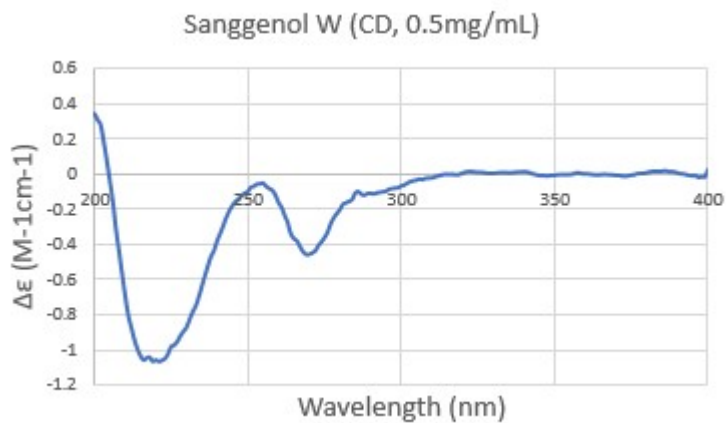

Figure S17. IR spectrum of sanggenol W (1)

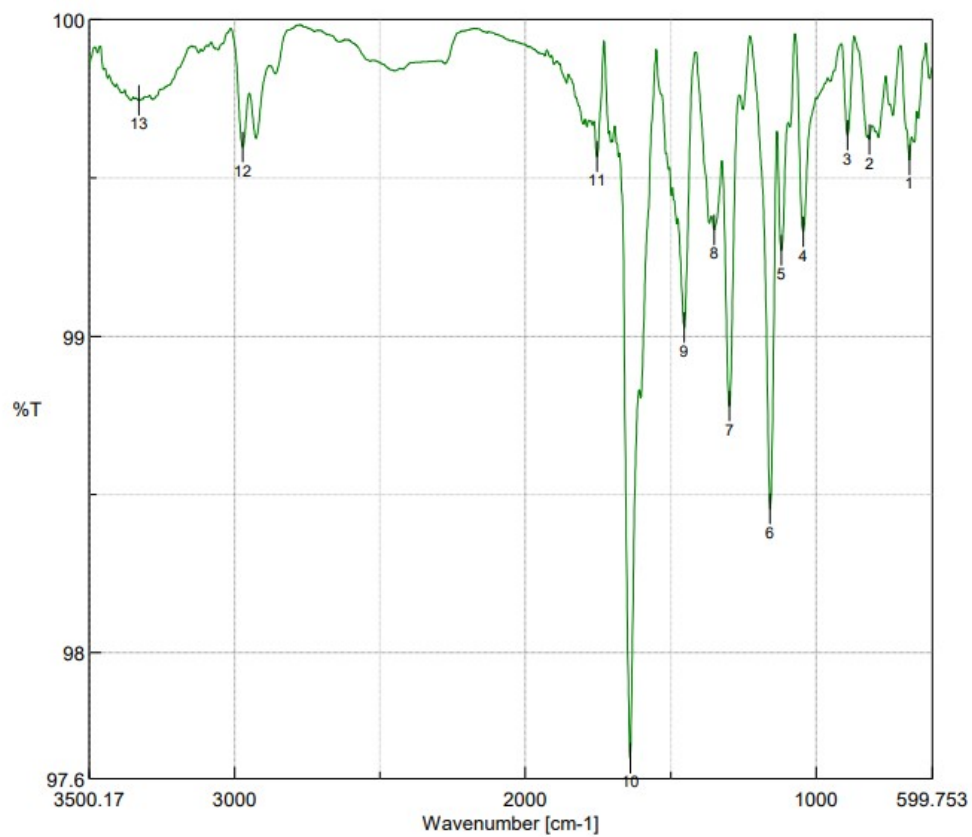

Result of Peak Picking

| No. | Position | Intensity | No. | Position | Intensity |
|-----|----------|-----------|-----|----------|-----------|
| 1   | 678.82   | 99.5559   | 2   | 816.706  | 99.6213   |
| 3   | 891.916  | 99.6336   | 4   | 1044.26  | 99.3296   |
| 5   | 1119.48  | 99.2707   | 6   | 1158.04  | 98.4535   |
| 7   | 1297.86  | 98.7775   | 8   | 1349.93  | 99.3345   |
| 9   | 1453.1   | 99.027    | 10  | 1639.2   | 97.6641   |
| 11  | 1753.94  | 99.5674   | 12  | 2972.73  | 99.5961   |
| 13  | 3329.5   | 99.7435   |     |          |           |

**Figure S18–S25.** 1D and 2D NMR, MS, and IR spectra of morusalnol D (2)

**Figure S18.**  $^1\text{H}$  NMR spectrum of morusalnol D (2) in  $\text{CDCl}_3$

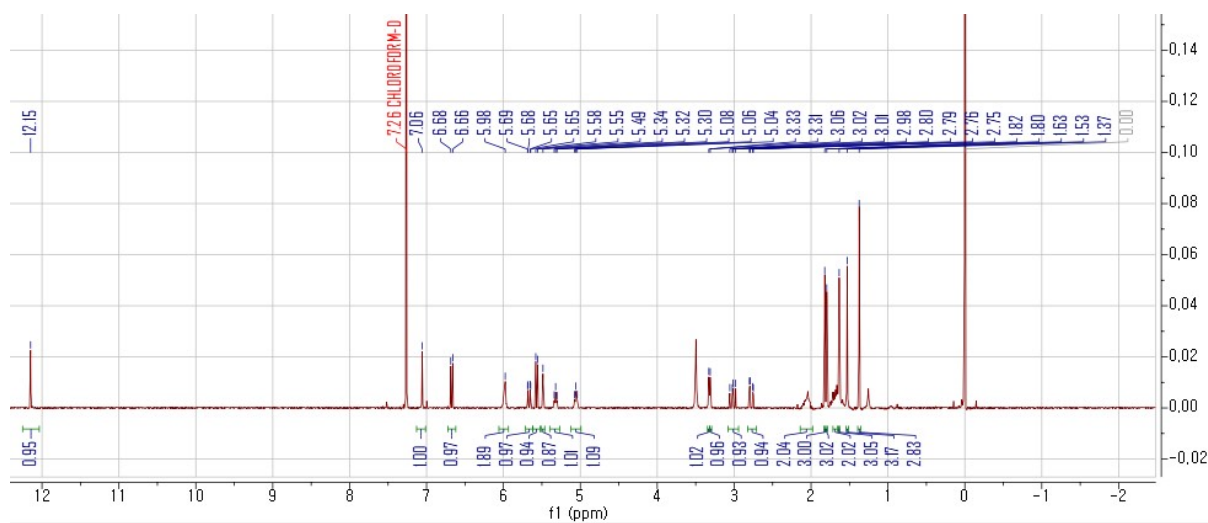

**Figure S19.**  $^{13}\text{C}$  NMR spectrum of morusalnol D (2) in  $\text{CDCl}_3$

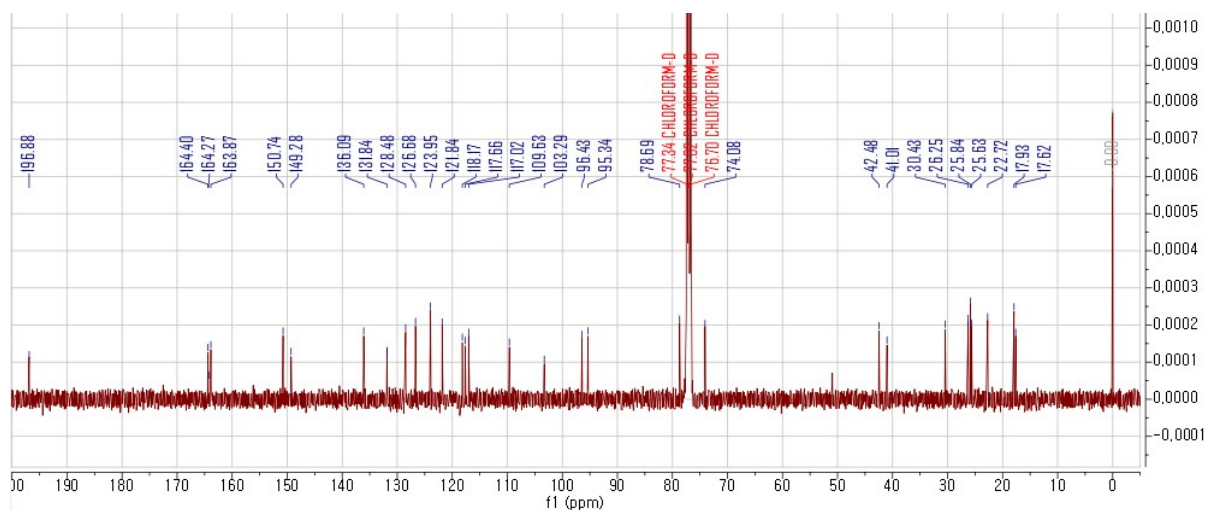

**Figure S20.** HSQC spectrum of morusalnol D (**2**) in CDCl<sub>3</sub>

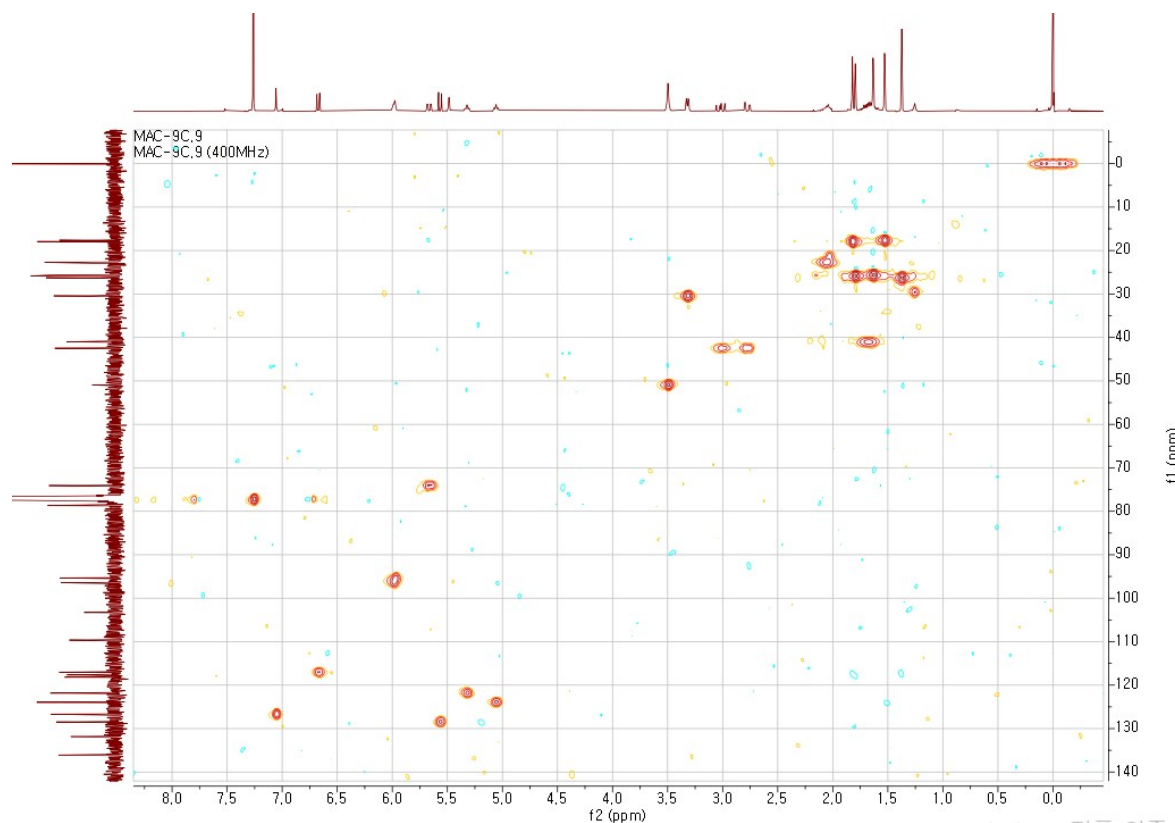

**Figure S21.** COSY spectrum of morusalnol D (**2**) in CDCl<sub>3</sub>

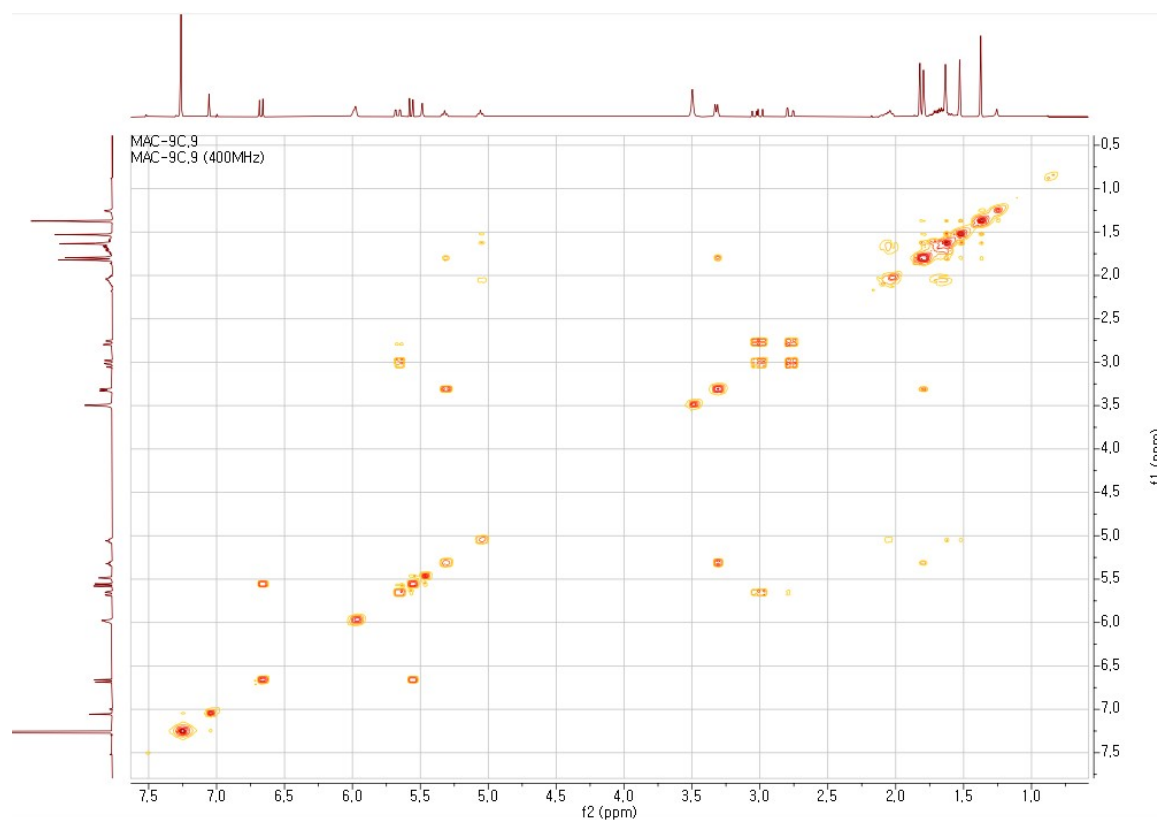

**Figure S22.** HMBC spectrum of morusalnol D (**2**) in CDCl<sub>3</sub>

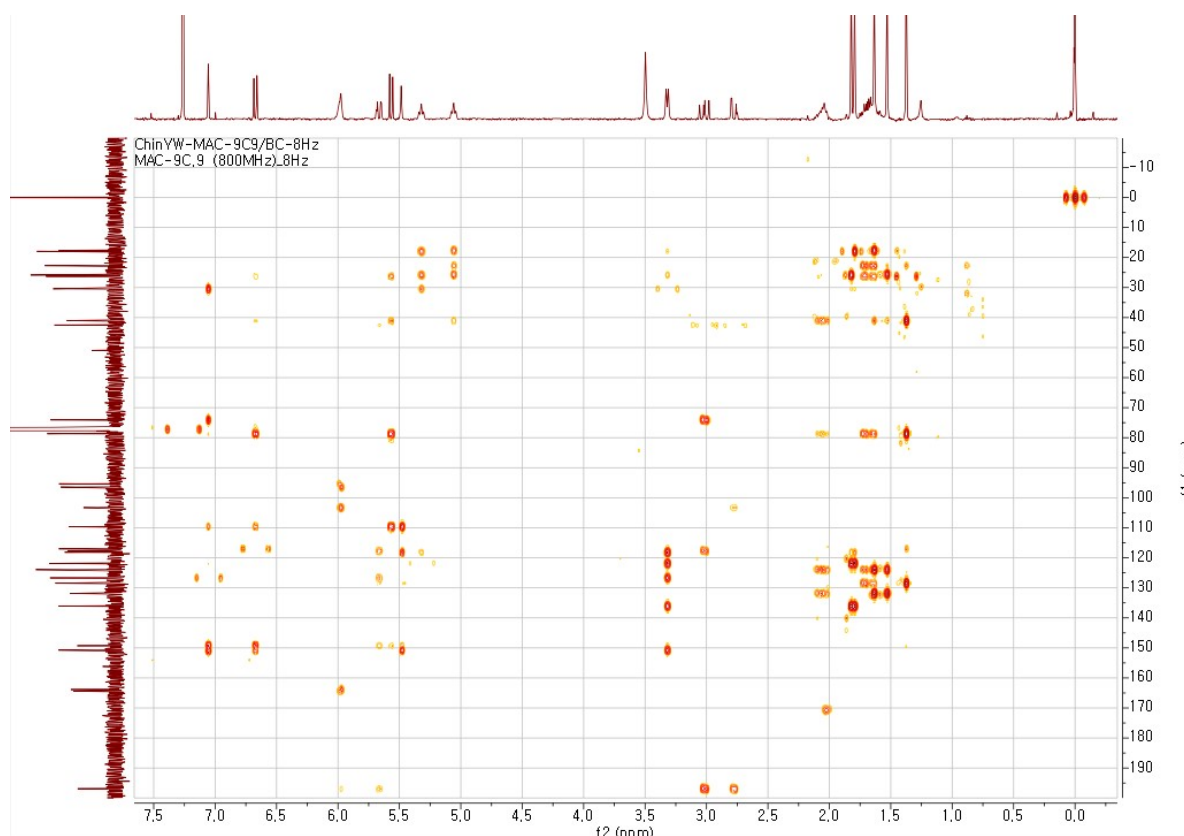

**Figure S23.** HRESIMS spectrum of morusalnol D (**2**)

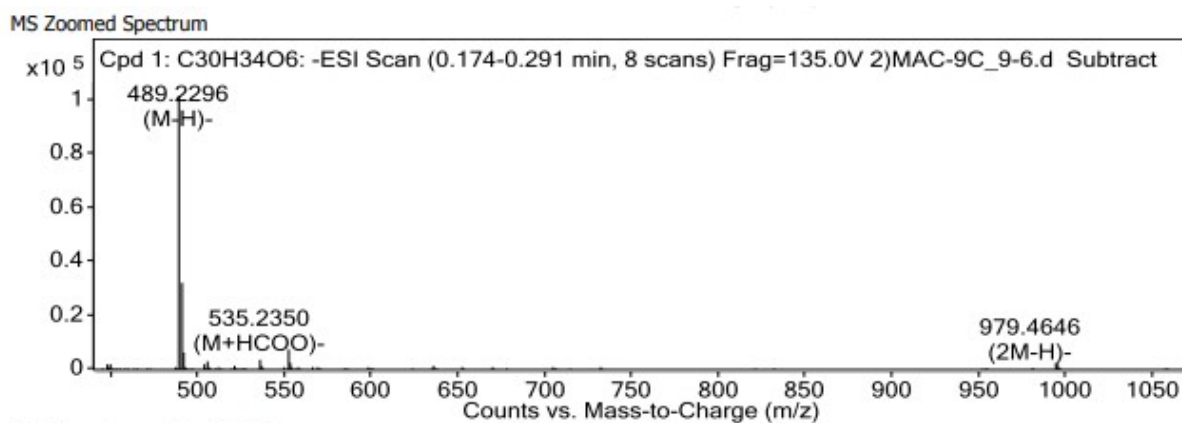

**MS Spectrum Peak List**

| <i>m/z</i> | <i>Calc m/z</i> | Diff(ppm) | <i>z</i> | Abund  | Formula                                                       | Ion                                         |
|------------|-----------------|-----------|----------|--------|---------------------------------------------------------------|---------------------------------------------|
| 471.2094   | 471.2177        | -17.64    | -1       | 166    | C <sub>30</sub> H <sub>31</sub> O <sub>5</sub>                | (M-H)-[-H <sub>2</sub> O]                   |
| 489.2296   | 489.2283        | 2.69      |          | 101413 | C <sub>30</sub> H <sub>33</sub> O <sub>6</sub>                | (M-H)-                                      |
| 525.2021   | 525.2049        | -5.47     | -1       | 625    | C <sub>30</sub> H <sub>34</sub> Cl O <sub>6</sub>             | (M+Cl)-                                     |
| 535.235    | 535.2337        | 2.4       | -1       | 3946   | C <sub>31</sub> H <sub>35</sub> O <sub>8</sub>                | (M+HCOO)-                                   |
| 571.164    | 571.1529        | 19.4      | -1       | 149    | C <sub>30</sub> H <sub>34</sub> Br O <sub>6</sub>             | (M+Br)-                                     |
| 585.2144   | 585.2106        | 6.5       | -1       | 393    | C <sub>32</sub> H <sub>32</sub> F <sub>3</sub> O <sub>7</sub> | (M+CF <sub>3</sub> COO)-[-H <sub>2</sub> O] |
| 603.2146   | 603.2211        | -10.76    | -1       | 166    | C <sub>32</sub> H <sub>34</sub> F <sub>3</sub> O <sub>8</sub> | (M+CF <sub>3</sub> COO)-                    |
| 979.4646   | 979.4638        | 0.77      | -1       | 571    | C <sub>60</sub> H <sub>67</sub> O <sub>12</sub>               | (2M-H)-                                     |
| 1025.4445  | 1025.4693       | -24.2     | -1       | 259    | C <sub>61</sub> H <sub>69</sub> O <sub>14</sub>               | (2M+HCOO)-                                  |
| 1039.4431  | 1039.4849       | -40.26    | -1       | 162    | C <sub>62</sub> H <sub>71</sub> O <sub>14</sub>               | (2M+CH <sub>3</sub> COO)-                   |

Figure S24. ECD spectrum of morusalnol D (2)

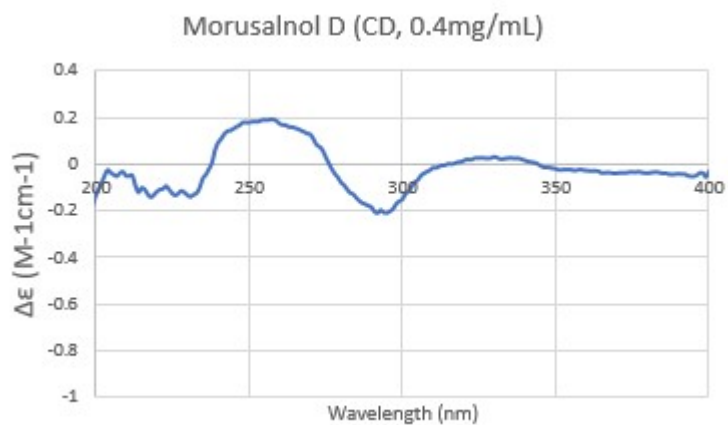

Figure S25. IR spectrum of morusalnol D (2)

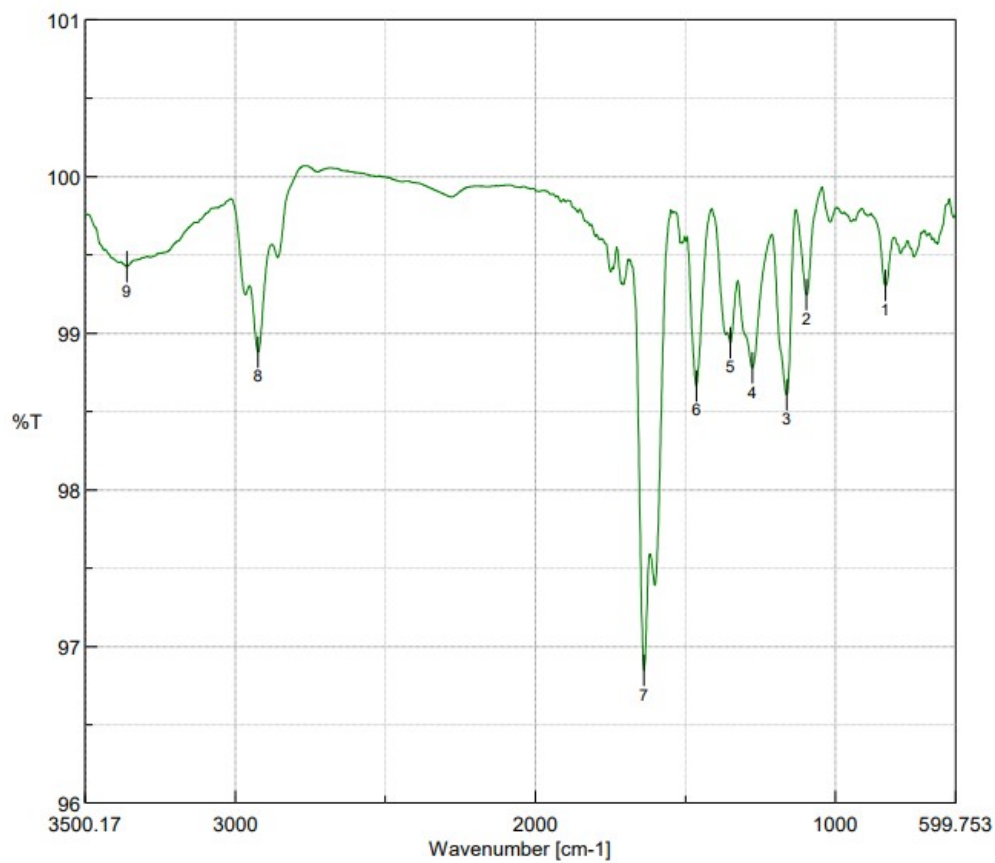

Result of Peak Picking

| No. | Position | Intensity | No. | Position | Intensity |
|-----|----------|-----------|-----|----------|-----------|
| 1   | 834.062  | 99.3027   | 2   | 1096.33  | 99.2437   |
| 3   | 1162.87  | 98.6058   | 4   | 1277.61  | 98.7784   |
| 5   | 1349.93  | 98.9367   | 6   | 1463.71  | 98.6628   |
| 7   | 1638.23  | 96.8474   | 8   | 2923.56  | 98.8782   |
| 9   | 3361.32  | 99.4242   |     |          |           |

Figure S26–S33. 1D and 2D NMR, MS, and IR spectra of morusalnol E (3)

Figure S26. <sup>1</sup>H NMR spectrum of morusalnol E (3) in methanol-*d*<sub>4</sub>

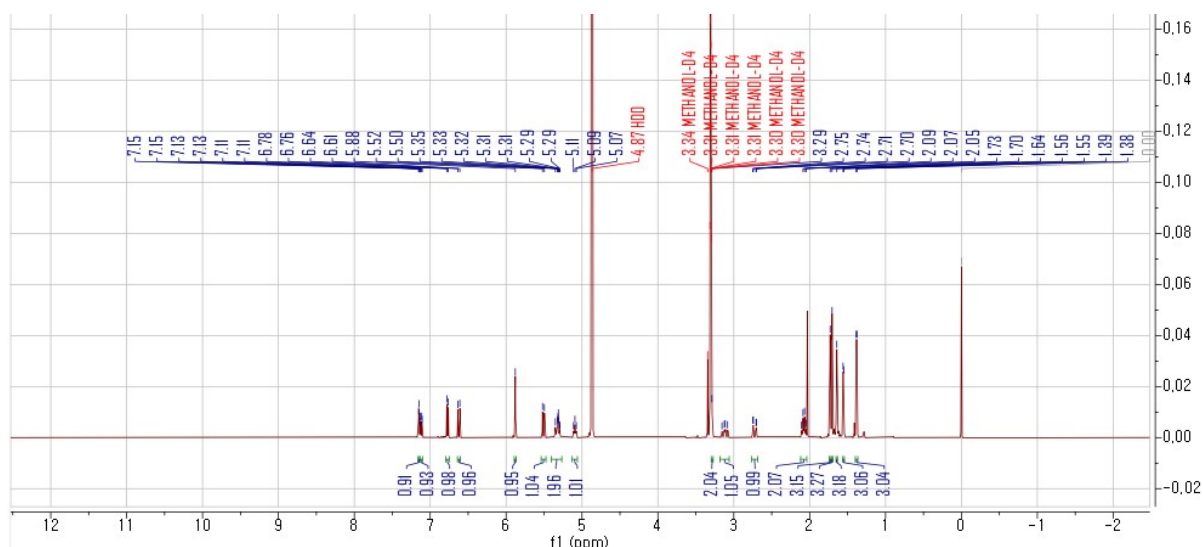

Figure S27. <sup>13</sup>C NMR spectrum of morusalnol E (3) in methanol-*d*<sub>4</sub>

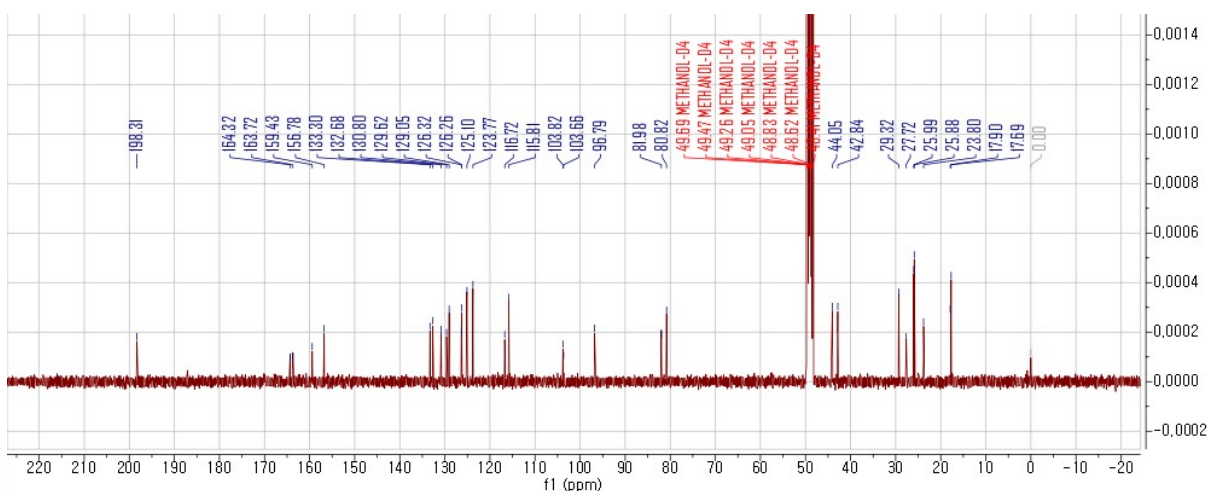



**Figure S28.** HSQC spectrum of morusalnol E (**3**) in methanol- $d_4$

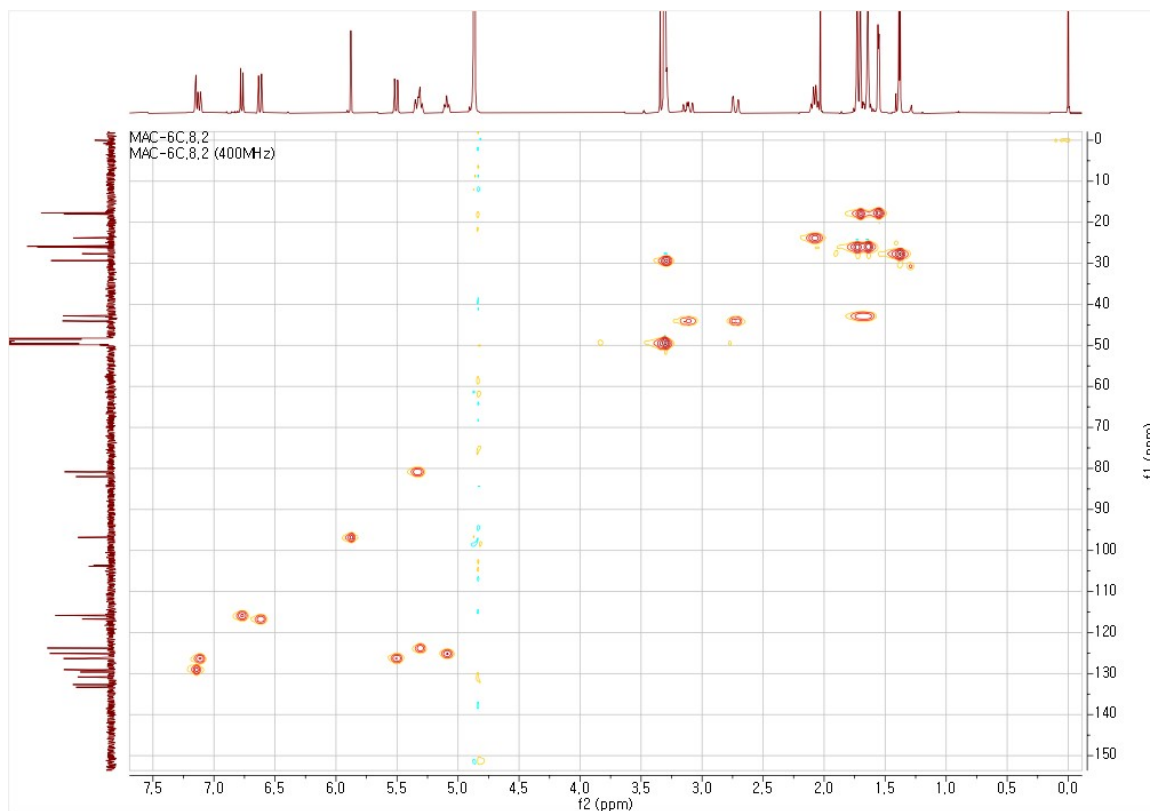

**Figure S29.** COSY spectrum of morusalnol E (**3**) in methanol- $d_4$

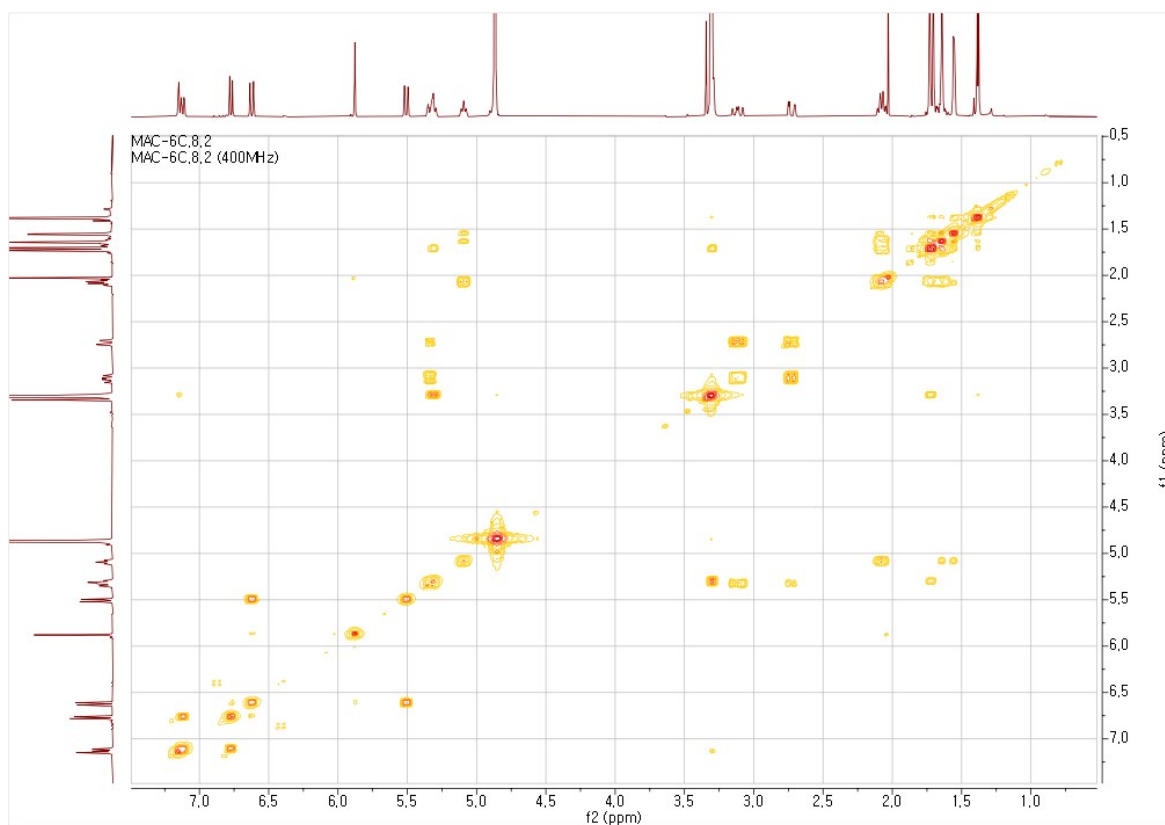

**Figure S30.** HMBC spectrum of morusalnol E (**3**) in methanol-*d*<sub>4</sub> (800 MHz)

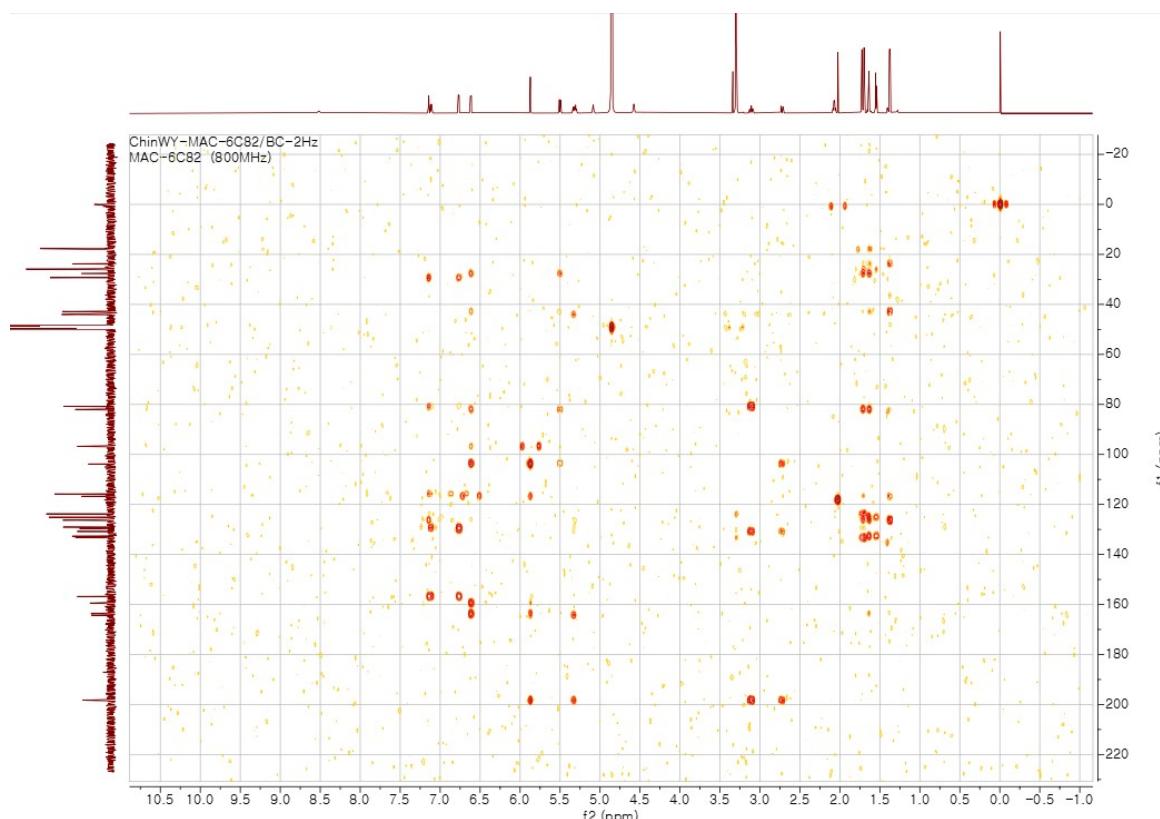

**Figure S31.** HRESIMS spectrum of morusalnol E (**3**)

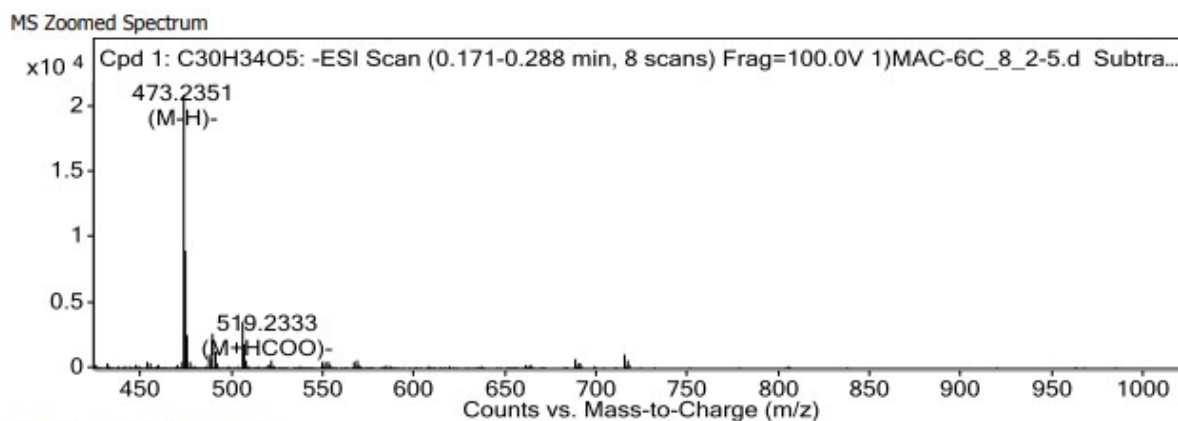

**MS Spectrum Peak List**

| <i>m/z</i> | <i>Calc m/z</i> | Diff(ppm) | <i>z</i> | Abund | Formula                                                       | Ion                                        |
|------------|-----------------|-----------|----------|-------|---------------------------------------------------------------|--------------------------------------------|
| 455.2268   | 455.2228        | 8.91      | -1       | 64    | C <sub>30</sub> H <sub>31</sub> O <sub>4</sub>                | (M-H)-[H <sub>2</sub> O]                   |
| 473.2351   | 473.2333        | 3.72      | -1       | 20859 | C <sub>30</sub> H <sub>33</sub> O <sub>5</sub>                | (M-H)-                                     |
| 491.1904   | 491.1995        | -18.53    | -1       | 82    | C <sub>30</sub> H <sub>32</sub> Cl O <sub>4</sub>             | (M+Cl)-[H <sub>2</sub> O]                  |
| 501.2209   | 501.2283        | -14.77    | -1       | 109   | C <sub>31</sub> H <sub>33</sub> O <sub>6</sub>                | (M+HCOO)-[H <sub>2</sub> O]                |
| 509.2064   | 509.21          | -7.2      | -1       | 188   | C <sub>30</sub> H <sub>34</sub> Cl O <sub>5</sub>             | (M+Cl)-                                    |
| 519.2333   | 519.2388        | -10.72    | -1       | 376   | C <sub>31</sub> H <sub>35</sub> O <sub>7</sub>                | (M+HCOO)-                                  |
| 533.2375   | 533.2545        | -31.86    | -1       | 93    | C <sub>32</sub> H <sub>37</sub> O <sub>7</sub>                | (M+CH <sub>3</sub> COO)-                   |
| 569.2223   | 569.2156        | 11.74     | -1       | 372   | C <sub>32</sub> H <sub>32</sub> F <sub>3</sub> O <sub>6</sub> | (M+CF <sub>3</sub> COO)-[H <sub>2</sub> O] |
| 587.2204   | 587.2262        | -9.96     | -1       | 125   | C <sub>32</sub> H <sub>34</sub> F <sub>3</sub> O <sub>7</sub> | (M+CF <sub>3</sub> COO)-                   |
| 993.4377   | 993.4795        | -42.05    | -1       | 55    | C <sub>61</sub> H <sub>69</sub> O <sub>12</sub>               | (2M+HCOO)-                                 |

**Figure S32.** ECD spectrum of morusalnol E (3)

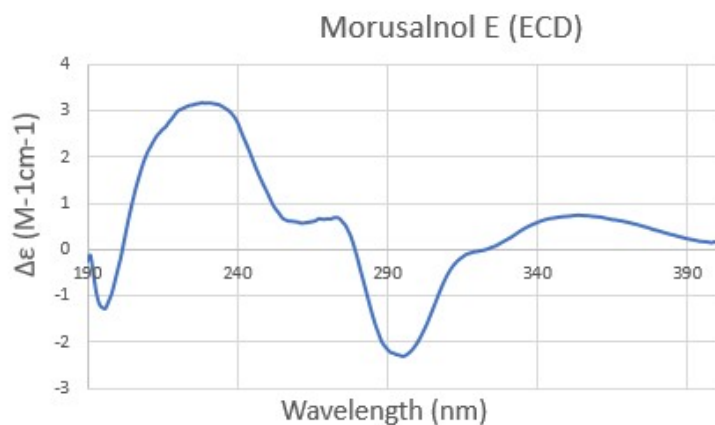

**Figure S33.** IR spectrum of morusalnol E (3)

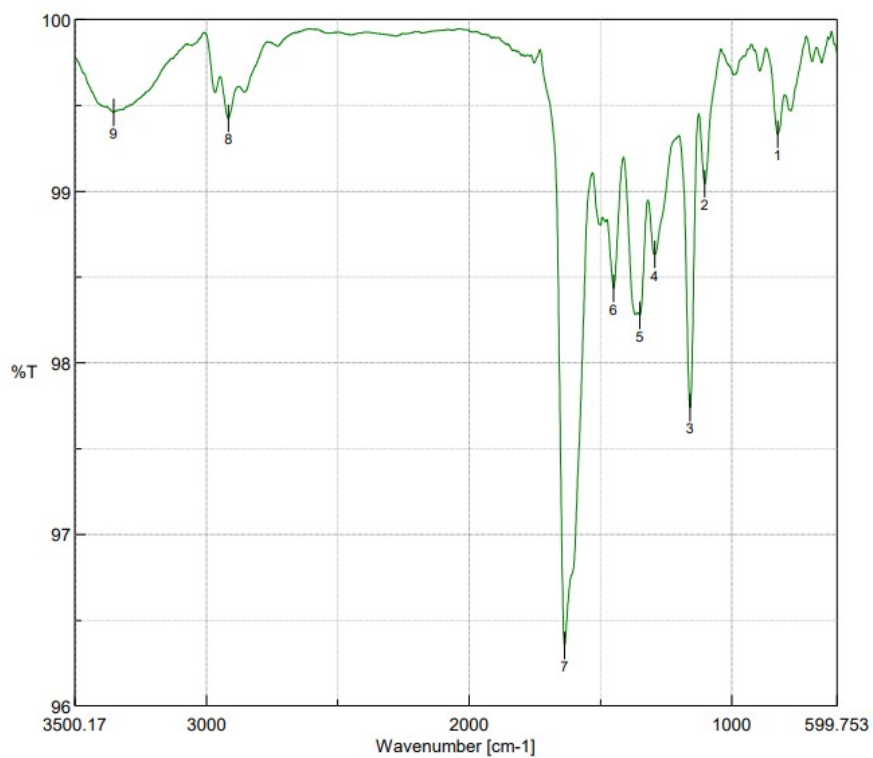

Result of Peak Picking

| No. | Position | Intensity | No. | Position | Intensity |
|-----|----------|-----------|-----|----------|-----------|
| 1   | 825.384  | 99.3305   | 2   | 1103.08  | 99.0419   |
| 3   | 1159.01  | 97.739    | 4   | 1294     | 98.63     |
| 5   | 1349.93  | 98.2747   | 6   | 1450.21  | 98.4334   |
| 7   | 1637.27  | 96.3512   | 8   | 2916.81  | 99.4227   |
| 9   | 3353.6   | 99.4588   |     |          |           |

Figure S34–S41. 1D and 2D NMR, MS, and IR spectra of morusalnol F (4)

Figure S34. <sup>1</sup>H NMR spectrum of morusalnol F (4) in CDCl<sub>3</sub>

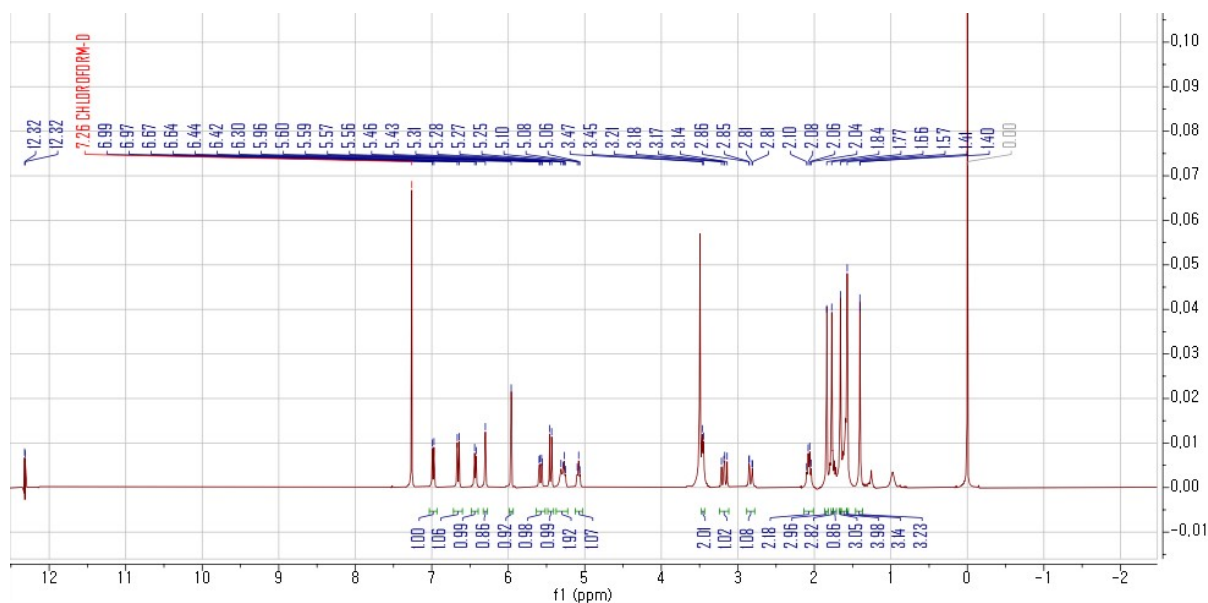

Figure S35. <sup>13</sup>C NMR spectrum of morusalnol F (4) in CDCl<sub>3</sub>

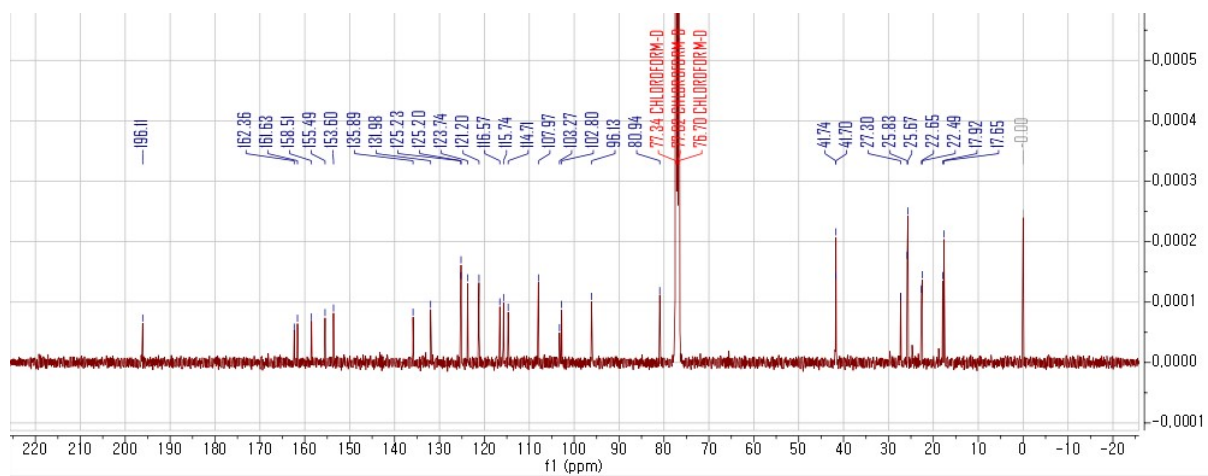

**Figure S36.** HSQC spectrum of morusalnol F (**4**) in  $\text{CDCl}_3$

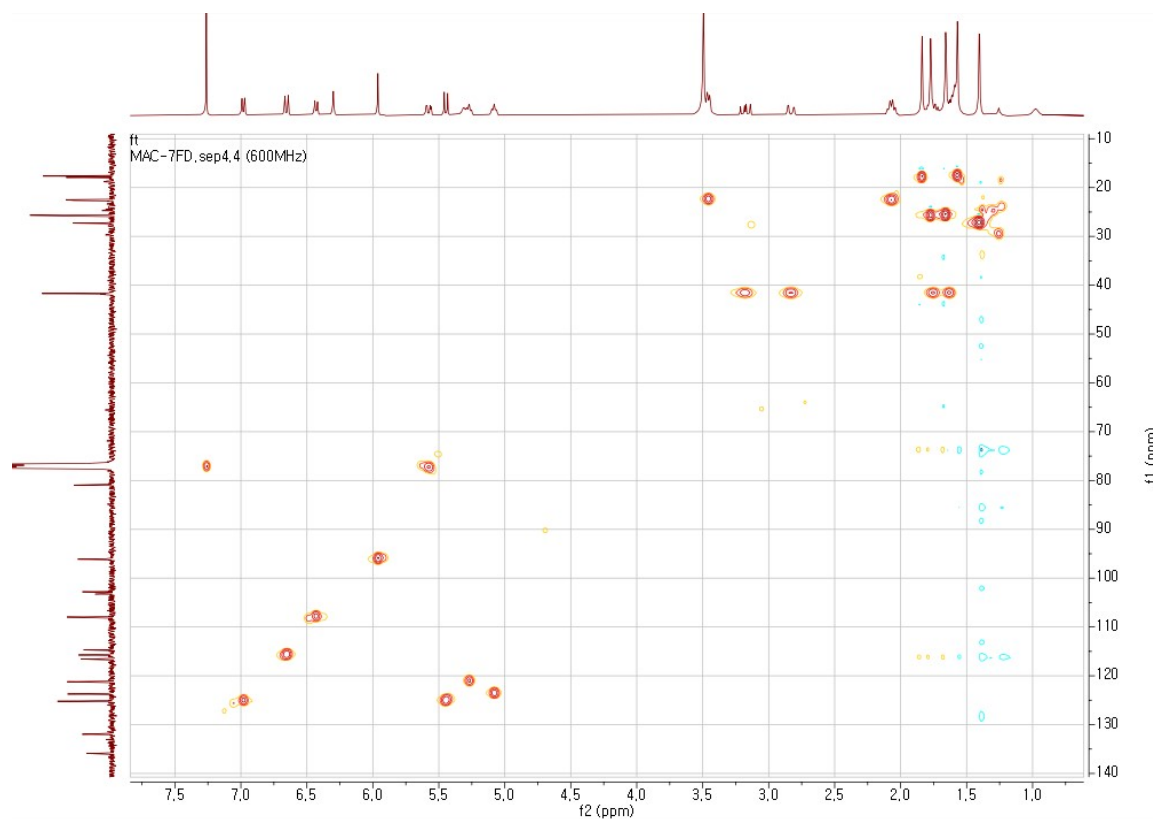

**Figure S37.** COSY spectrum of morusalnol F (**4**) in  $\text{CDCl}_3$

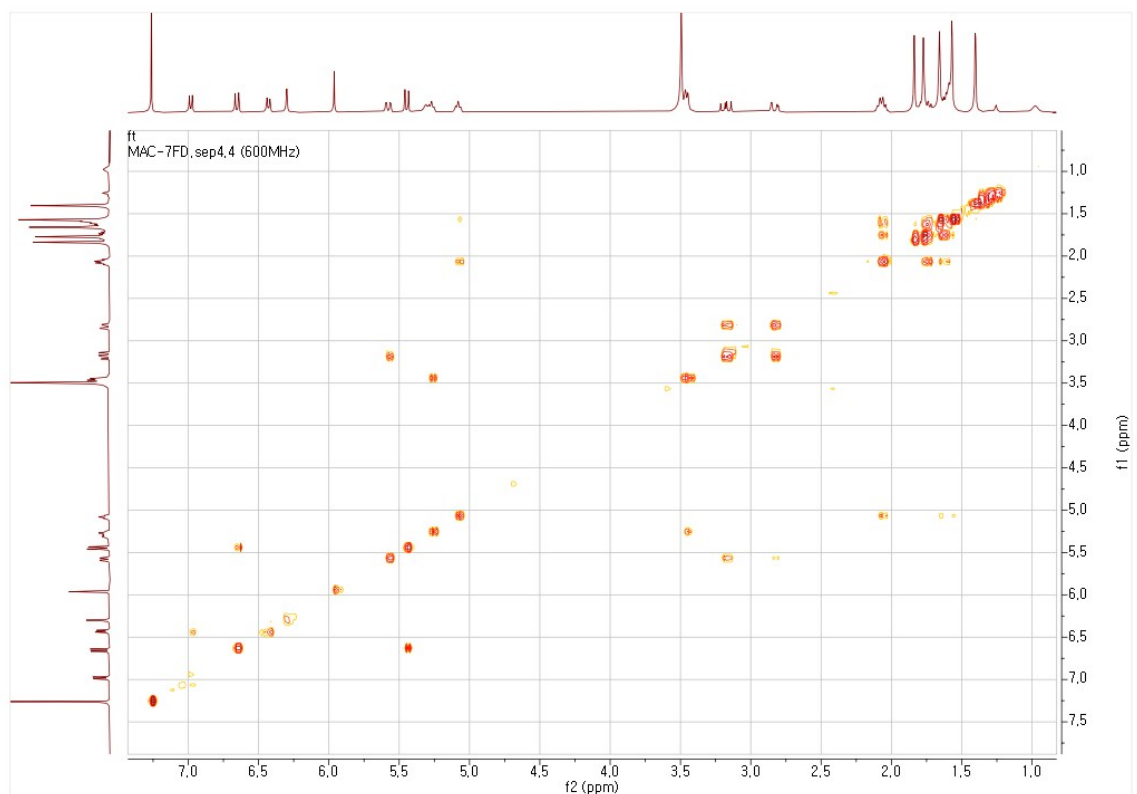

Figure S38. HMBC spectrum of morusalnol F (4) in CDCl<sub>3</sub>

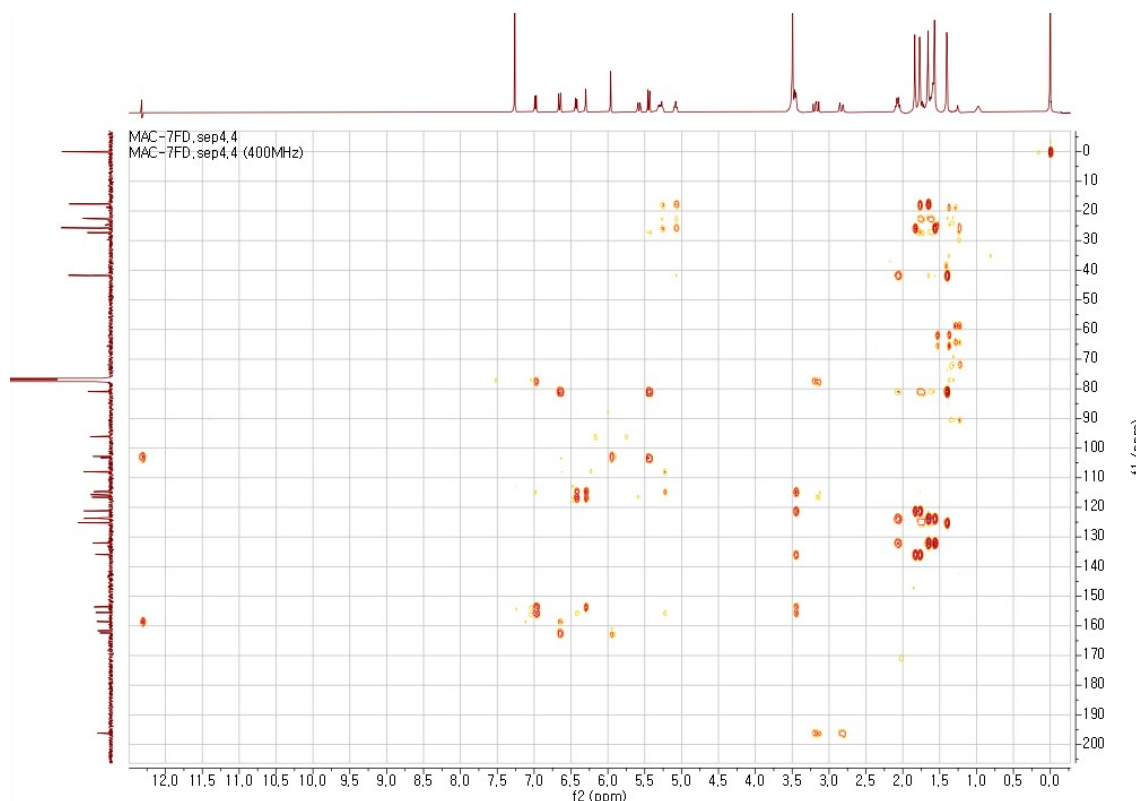

Figure S39. HRESIMS spectrum of morusalnol F (4)

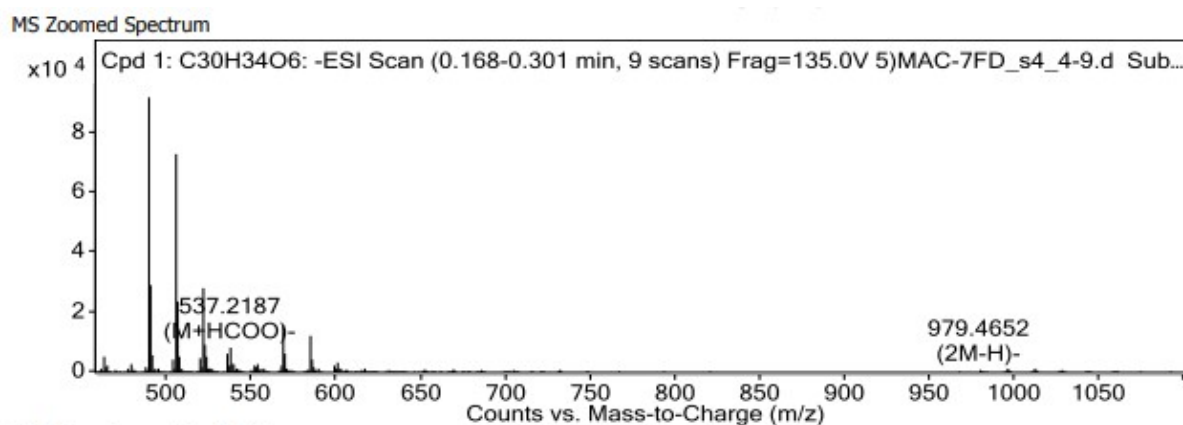

MS Spectrum Peak List

| <i>m/z</i> | <i>Calc m/z</i> | Diff(ppm) | <i>z</i> | Abund | Formula                                                       | Ion                                         |
|------------|-----------------|-----------|----------|-------|---------------------------------------------------------------|---------------------------------------------|
| 489.2304   | 489.2283        | 4.3       |          | 91714 | C <sub>30</sub> H <sub>33</sub> O <sub>6</sub>                | (M-H)-                                      |
| 507.2325   | 507.1944        | 75.11     | -1       | 5411  | C <sub>30</sub> H <sub>32</sub> Cl O <sub>5</sub>             | (M+Cl)-[-H <sub>2</sub> O]                  |
| 525.2109   | 525.2049        | 11.31     | -1       | 1322  | C <sub>30</sub> H <sub>34</sub> Cl O <sub>6</sub>             | (M+Cl)-                                     |
| 535.2316   | 535.2337        | -3.99     | -1       | 6420  | C <sub>31</sub> H <sub>35</sub> O <sub>8</sub>                | (M+HCOO)-                                   |
| 585.2212   | 585.2106        | 18.11     | -1       | 4503  | C <sub>32</sub> H <sub>32</sub> F <sub>3</sub> O <sub>7</sub> | (M+CF <sub>3</sub> COO)-[-H <sub>2</sub> O] |
| 603.2168   | 603.2211        | -7.15     | -1       | 709   | C <sub>32</sub> H <sub>34</sub> F <sub>3</sub> O <sub>8</sub> | (M+CF <sub>3</sub> COO)-                    |
| 979.4652   | 979.4638        | 1.43      | -1       | 1055  | C <sub>60</sub> H <sub>67</sub> O <sub>12</sub>               | (2M-H)-                                     |
| 997.4671   | 997.4299        | 37.33     | -1       | 512   | C <sub>60</sub> H <sub>66</sub> Cl O <sub>11</sub>            | (2M+Cl)-[-H <sub>2</sub> O]                 |
| 1041.4312  | 1041.3794       | 49.71     | -1       | 428   | C <sub>60</sub> H <sub>66</sub> Br O <sub>11</sub>            | (2M+Br)-[-H <sub>2</sub> O]                 |
| 1059.4386  | 1059.39         | 45.88     | -1       | 381   | C <sub>60</sub> H <sub>68</sub> Br O <sub>12</sub>            | (2M+Br)-                                    |

**Figure S40.** ECD spectrum of morusalnol F (4)

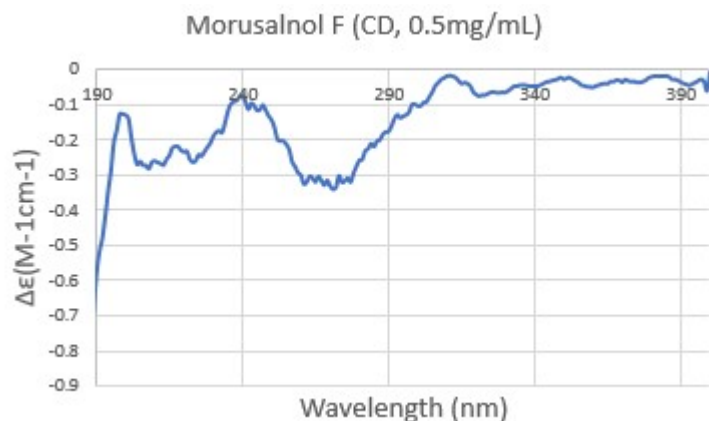

**Figure S41.** IR spectrum of morusalnol F (4)

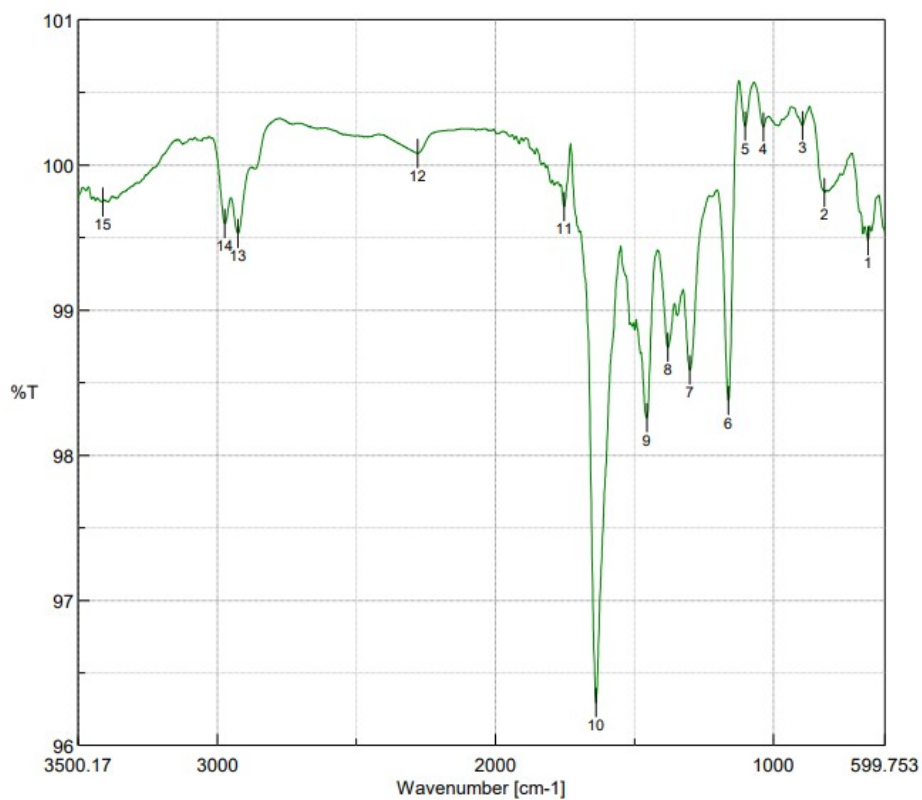

**Result of Peak Picking**

| No. | Position | Intensity | No. | Position | Intensity |
|-----|----------|-----------|-----|----------|-----------|
| 1   | 660.5    | 99.478    | 2   | 816.706  | 99.81     |
| 3   | 895.773  | 100.27    | 4   | 1036.55  | 100.261   |
| 5   | 1102.12  | 100.268   | 6   | 1161.9   | 98.3777   |
| 7   | 1300.75  | 98.5856   | 8   | 1379.82  | 98.7423   |
| 9   | 1455.99  | 98.2559   | 10  | 1638.23  | 96.2941   |
| 11  | 1752.98  | 99.7106   | 12  | 2279.45  | 100.079   |
| 13  | 2925.48  | 99.5268   | 14  | 2972.73  | 99.5956   |
| 15  | 3411.46  | 99.7426   |     |          |           |

Figure S42–S48. 1D and 2D NMR, MS, and IR spectra of neovanone A (5)

Figure S42. <sup>1</sup>H NMR spectrum of neovanone A (5) in methanol-*d*<sub>4</sub>

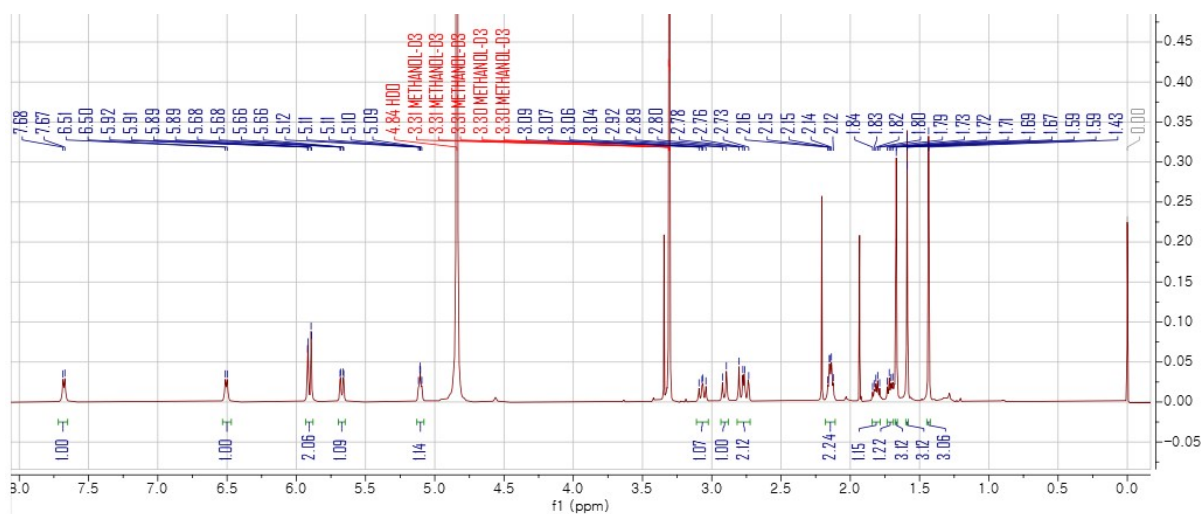

Figure S43. <sup>13</sup>C NMR spectrum of neovanone A (5) in methanol-*d*<sub>4</sub>

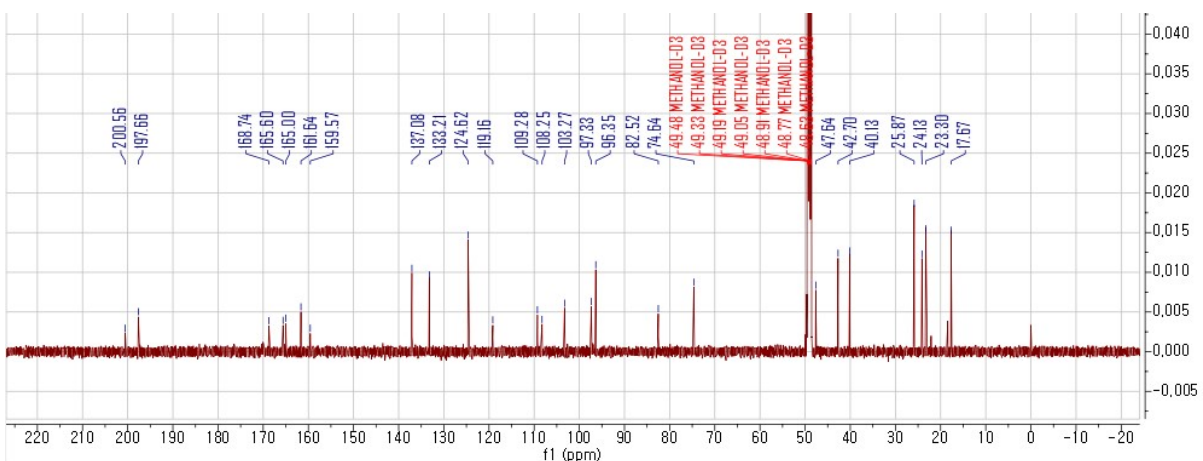



**Figure S44.** HSQC spectrum of neovanone A (**5**) in methanol- $d_4$

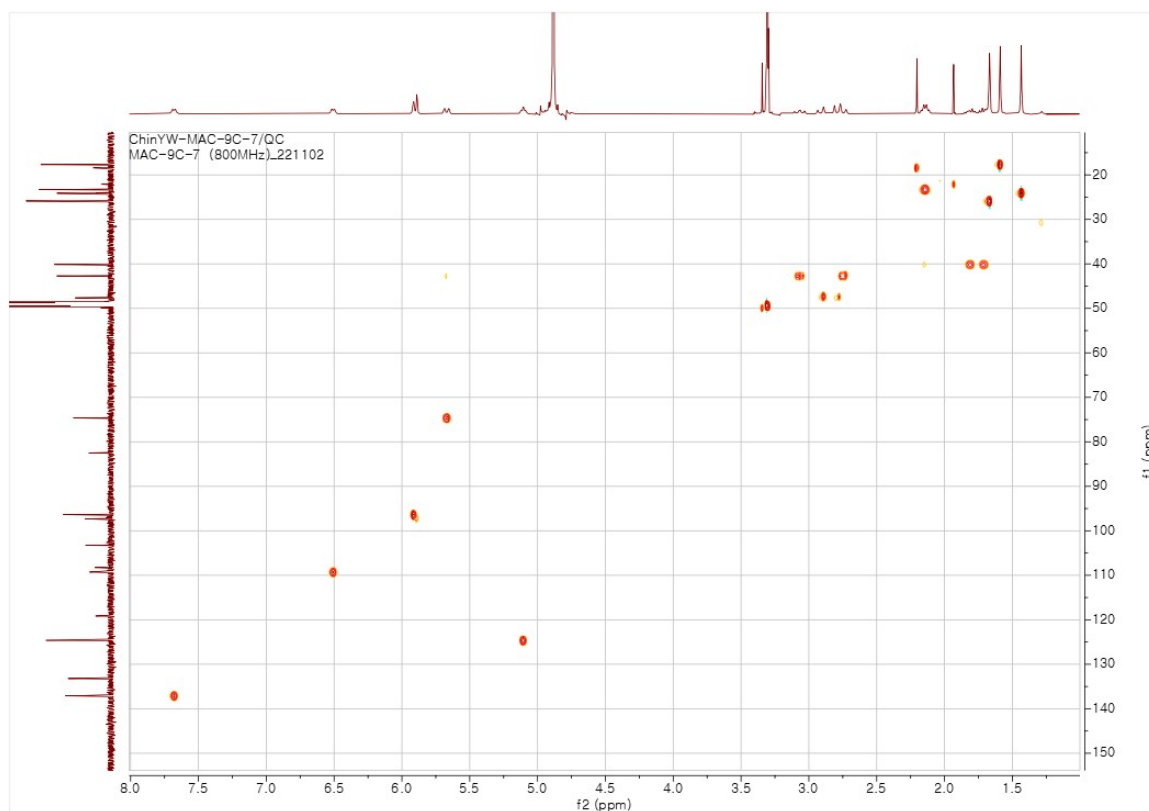

**Figure S45.** COSY spectrum of neovanone A (**5**) in methanol- $d_4$

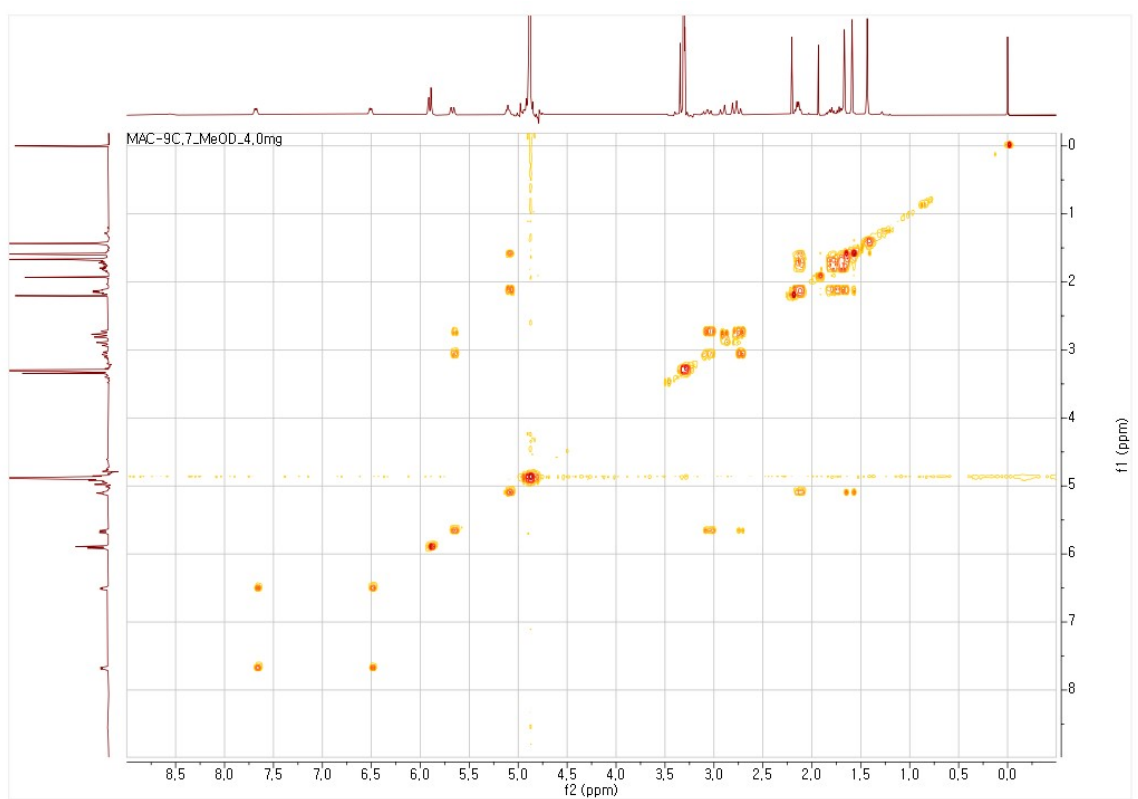

Figure S46. HMBC spectrum of neovanone A (5) in methanol-*d*<sub>4</sub>

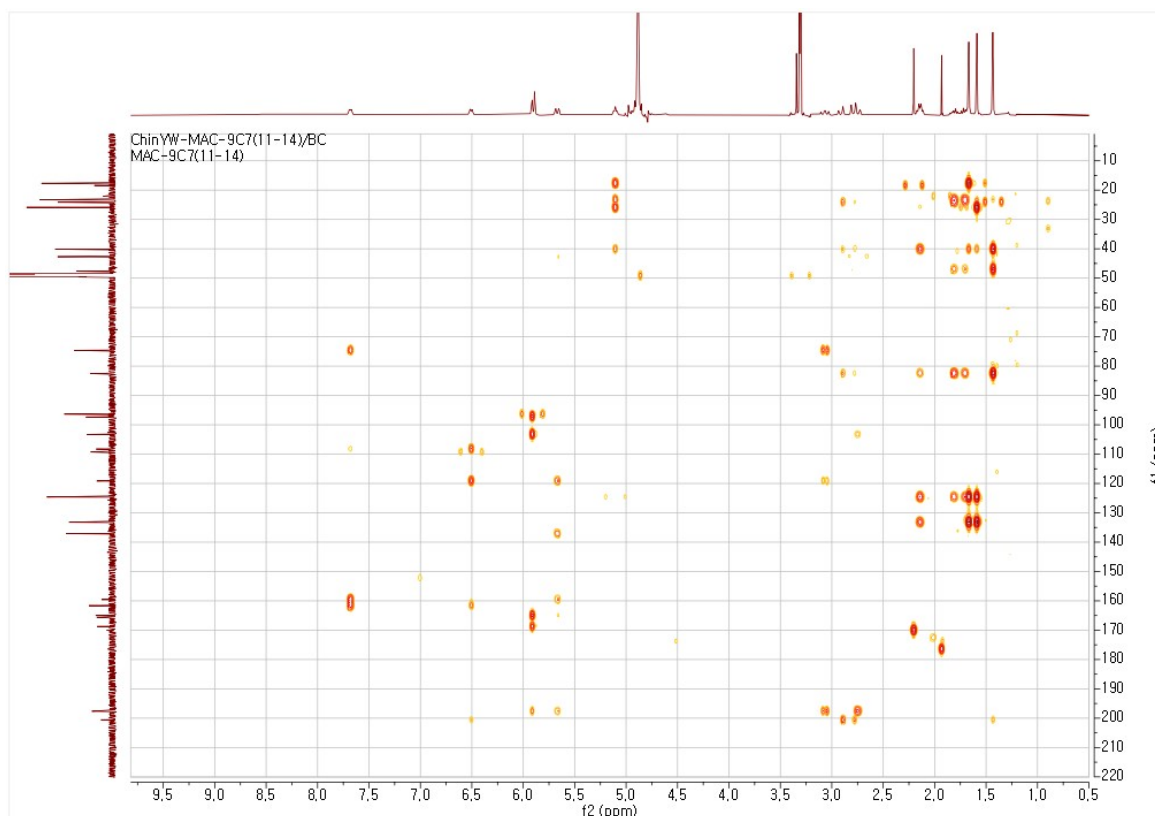

Figure S47. HRESIMS spectrum of neovanone A (5)

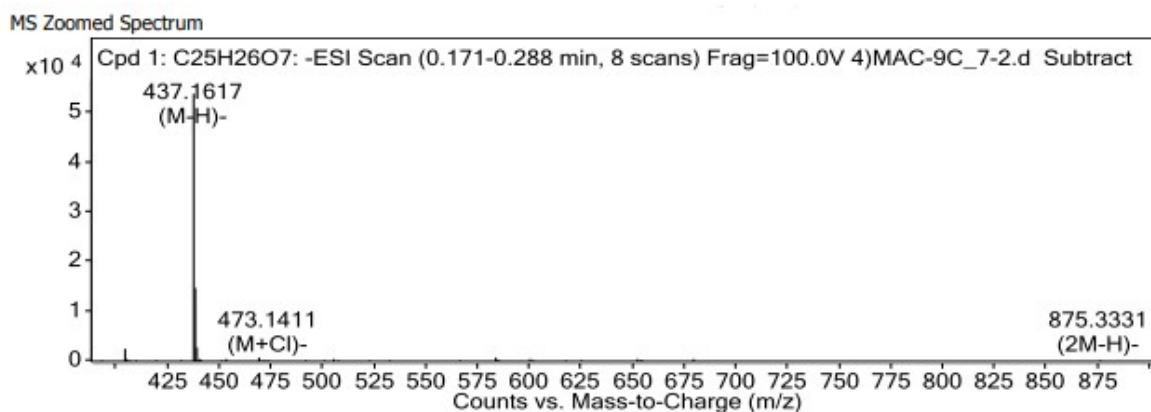

MS Spectrum Peak List

| <i>m/z</i> | <i>Calc m/z</i> | Diff(ppm) | <i>z</i> | Abund | Formula                                                       | Ion                                         |
|------------|-----------------|-----------|----------|-------|---------------------------------------------------------------|---------------------------------------------|
| 239.9037   |                 |           |          | 4003  |                                                               |                                             |
| 241.8987   |                 |           |          | 67032 |                                                               |                                             |
| 243.8994   |                 |           |          | 48973 |                                                               |                                             |
| 245.895    |                 |           |          | 18149 |                                                               |                                             |
| 419.147    | 419.15          | -7.22     | -1       | 247   | C <sub>25</sub> H <sub>23</sub> O <sub>6</sub>                | (M-H)-[-H <sub>2</sub> O]                   |
| 437.1617   | 437.1606        | 2.46      | -1       | 53752 | C <sub>25</sub> H <sub>25</sub> O <sub>7</sub>                | (M-H)-                                      |
| 438.1653   | 438.164         | 2.96      | -1       | 14734 | C <sub>25</sub> H <sub>25</sub> O <sub>7</sub>                | (M-H)-                                      |
| 473.1411   | 473.1373        | 8.11      | -1       | 181   | C <sub>25</sub> H <sub>26</sub> Cl O <sub>7</sub>             | (M+Cl)-                                     |
| 533.1405   | 533.1429        | -4.47     | -1       | 133   | C <sub>27</sub> H <sub>24</sub> F <sub>3</sub> O <sub>8</sub> | (M+CF <sub>3</sub> COO)-[-H <sub>2</sub> O] |
| 875.3331   | 875.3284        | 5.31      | -1       | 190   | C <sub>50</sub> H <sub>51</sub> O <sub>14</sub>               | (2M-H)-                                     |

**Figure S48.** IR spectrum of nevanone A (5)

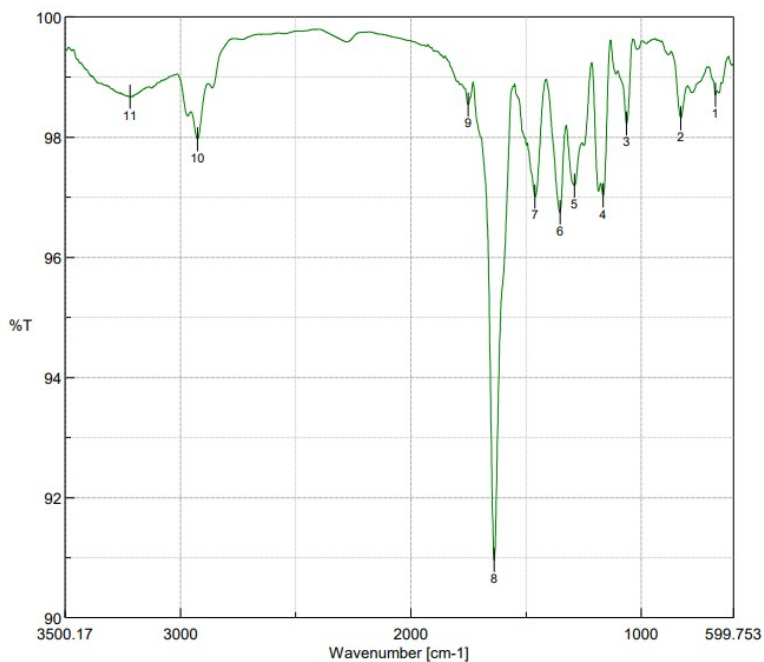

Result of Peak Picking

| No. | Position | Intensity | No. | Position | Intensity |
|-----|----------|-----------|-----|----------|-----------|
| 1   | 678.82   | 98.6999   | 2   | 828.277  | 98.3154   |
| 3   | 1063.55  | 98.226    | 4   | 1165.76  | 97.0259   |
| 5   | 1290.14  | 97.1922   | 6   | 1352.82  | 96.7439   |
| 7   | 1461.78  | 97.012    | 8   | 1638.23  | 90.9563   |
| 9   | 1751.05  | 98.5397   | 10  | 2925.48  | 97.9638   |
| 11  | 3218.61  | 98.6702   |     |          |           |

**Figure S49–S57.** 1D and 2D NMR, MS, and IR spectra of nevanone B (6)

**Figure S49.** <sup>1</sup>H NMR spectrum of nevanone B (6) in methanol-*d*<sub>4</sub>

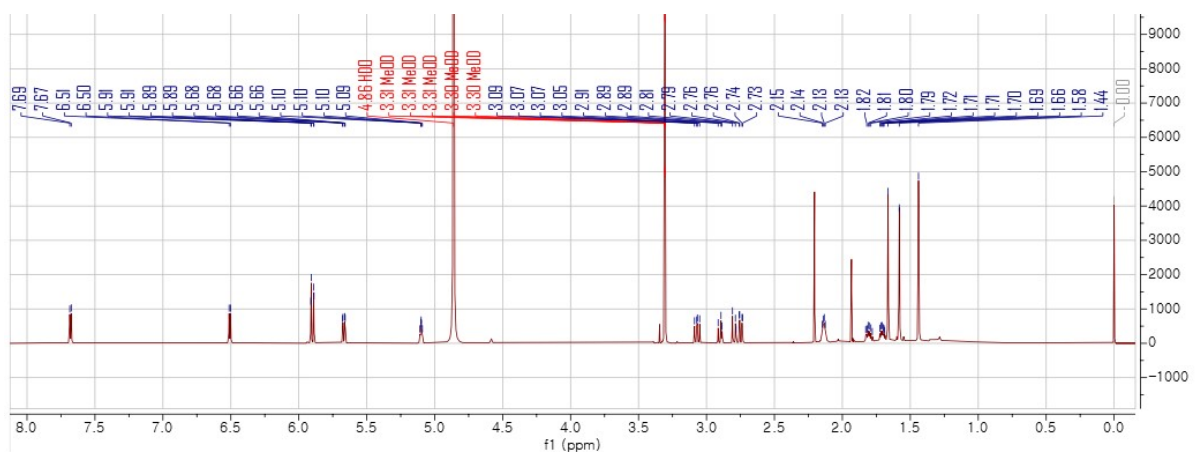

**Figure S50.**  $^{13}\text{C}$  NMR spectrum of neovanone B (**6**) in methanol- $d_4$

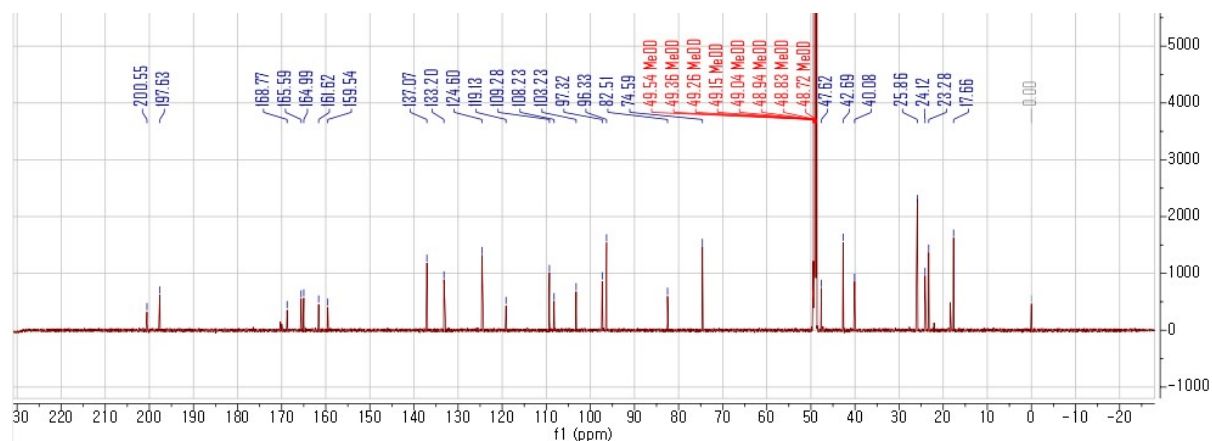

**Figure S51.** HSQC spectrum of neovanone B (**6**) in methanol- $d_4$

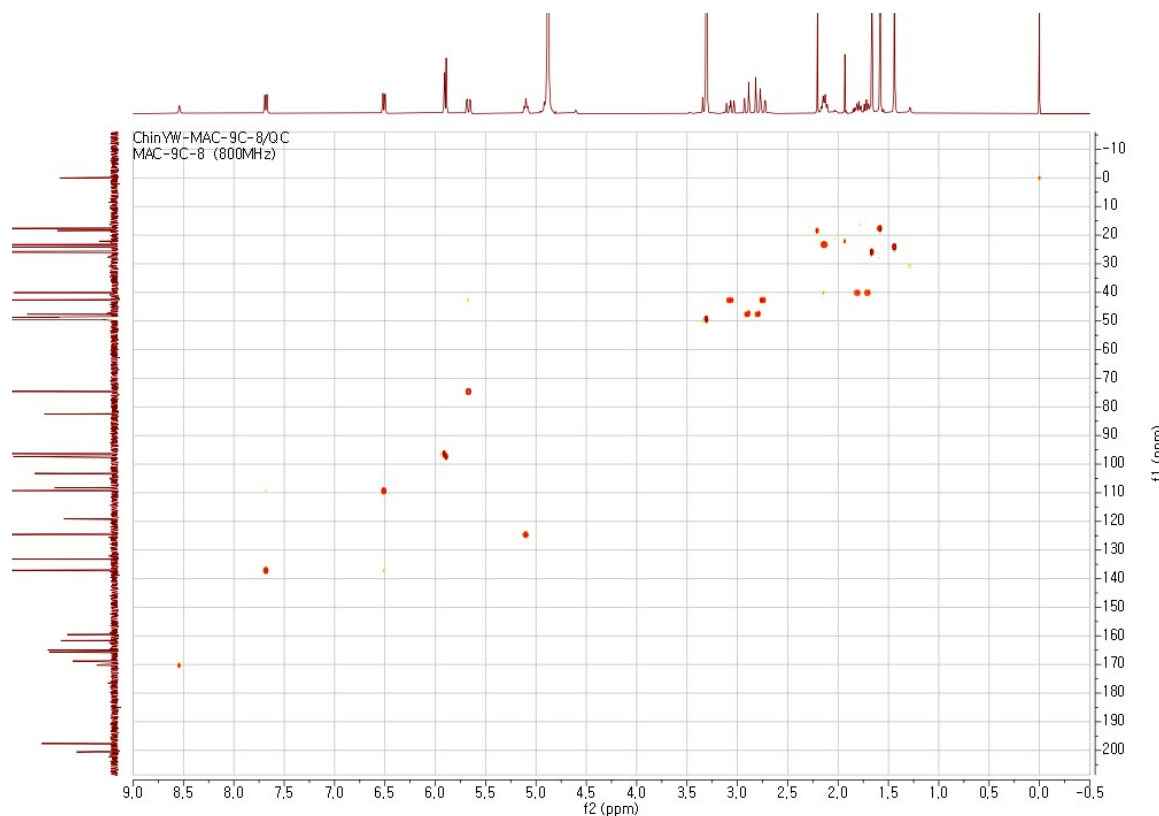

**Figure S52.** COSY spectrum of neovanone B (**6**) in methanol- $d_4$

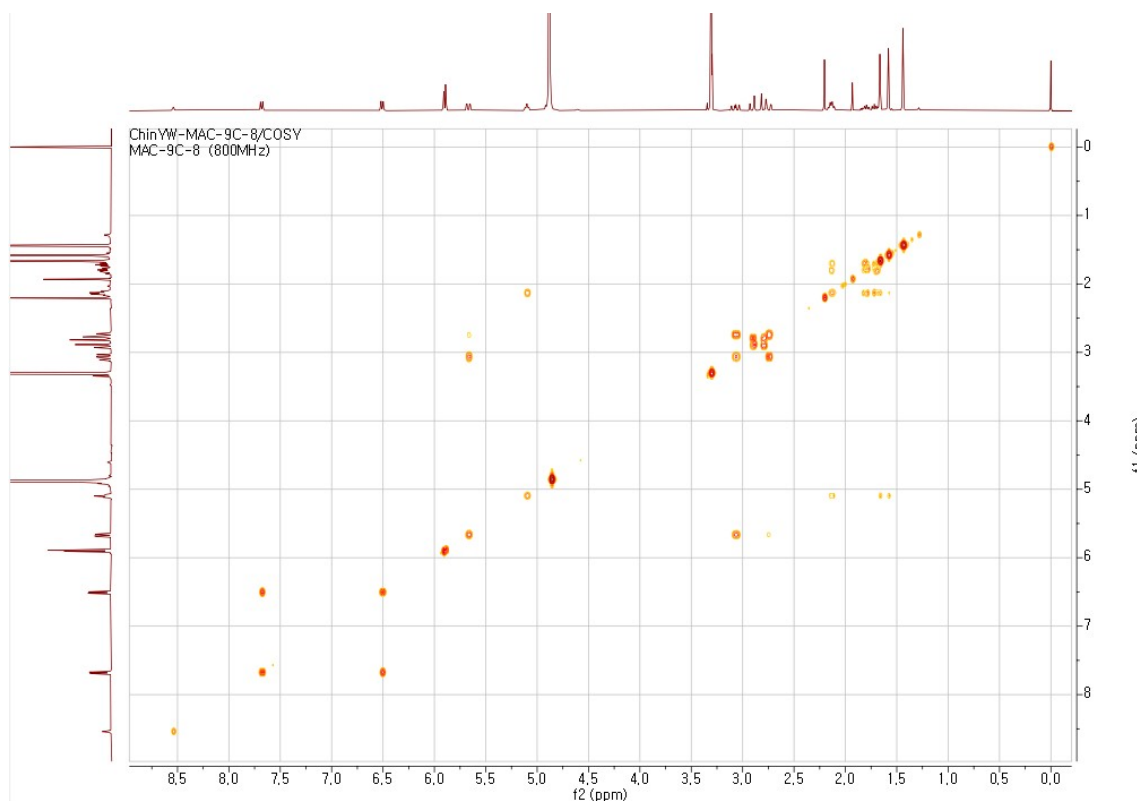

**Figure S53.** HMBC spectrum of neovanone B (**6**) in methanol- $d_4$

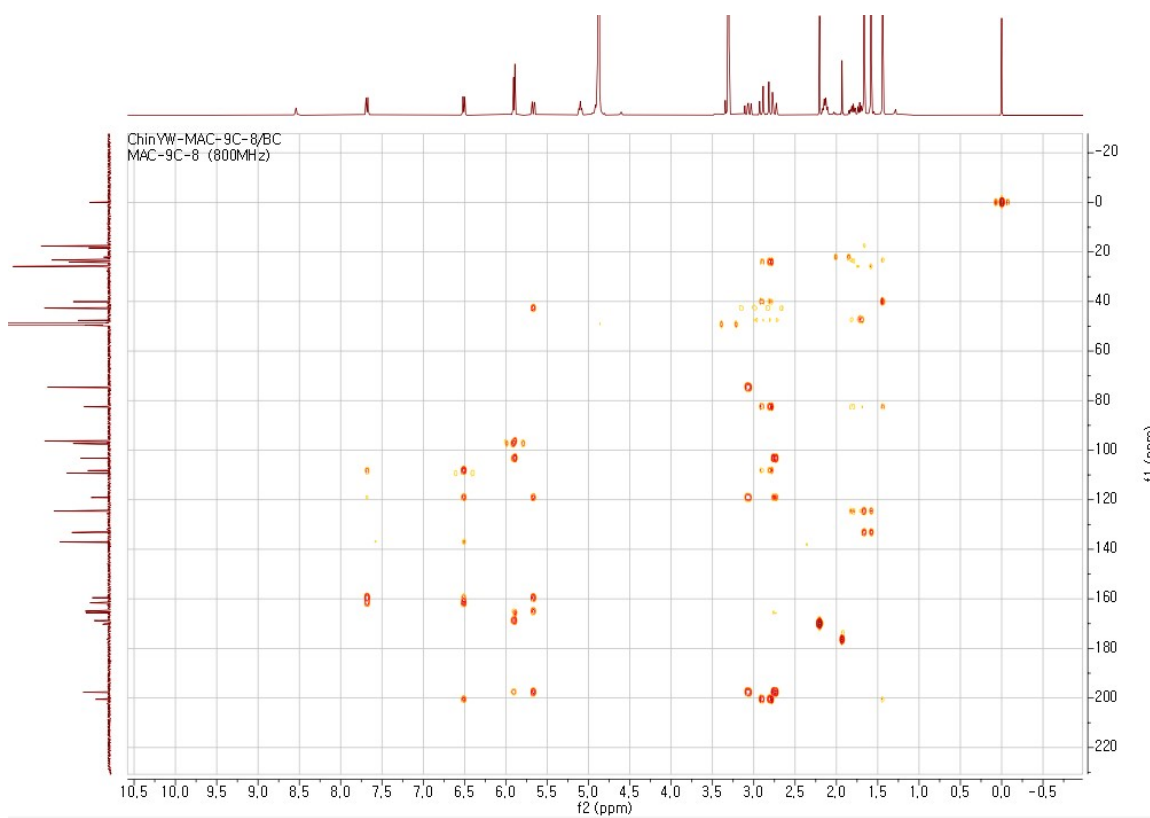

**Figure S54.** HRESIMS spectrum of neovanone B (6)

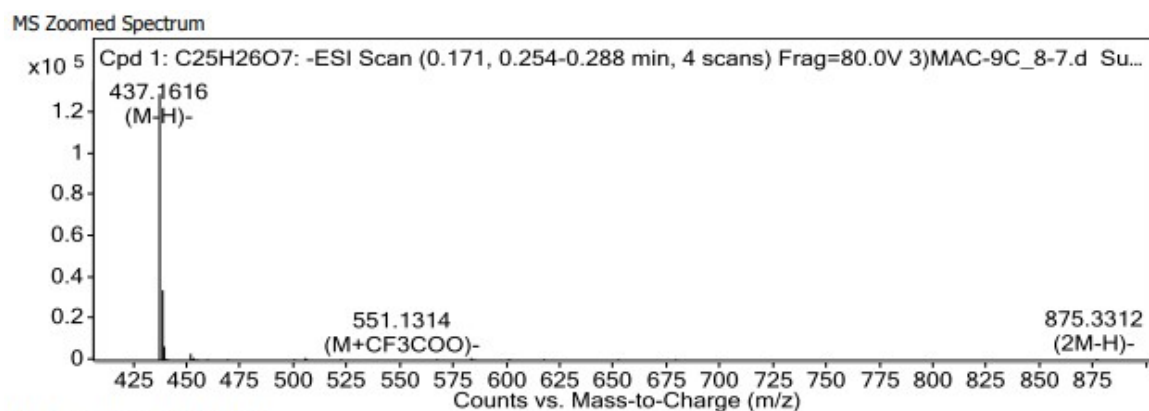

**MS Spectrum Peak List**

| m/z      | Calc m/z | Diff(ppm) | z  | Abund  | Formula                                                       | Ion                       |
|----------|----------|-----------|----|--------|---------------------------------------------------------------|---------------------------|
| 437.1616 | 437.1606 | 2.33      |    | 128914 | C <sub>25</sub> H <sub>25</sub> O <sub>7</sub>                | (M-H)-                    |
| 438.1658 | 438.164  | 4.07      |    | 33889  | C <sub>25</sub> H <sub>25</sub> O <sub>7</sub>                | (M-H)-                    |
| 438.2808 |          |           |    | 1459   |                                                               |                           |
| 438.3486 |          |           |    | 1116   |                                                               |                           |
| 439.1685 | 439.1666 | 4.2       |    | 6702   | C <sub>25</sub> H <sub>25</sub> O <sub>7</sub>                | (M-H)-                    |
| 455.1527 | 455.1267 | 57.11     | -1 | 169    | C <sub>25</sub> H <sub>24</sub> Cl O <sub>6</sub>             | (M+Cl)-[H <sub>2</sub> O] |
| 473.1255 | 473.1373 | -24.83    | -1 | 127    | C <sub>25</sub> H <sub>26</sub> Cl O <sub>7</sub>             | (M+Cl)-                   |
| 497.1507 | 497.1817 | -62.33    | -1 | 55     | C <sub>27</sub> H <sub>29</sub> O <sub>9</sub>                | (M+CH <sub>3</sub> COO)-  |
| 551.1314 | 551.1534 | -39.93    | -1 | 107    | C <sub>27</sub> H <sub>26</sub> F <sub>3</sub> O <sub>9</sub> | (M+CF <sub>3</sub> COO)-  |
| 875.3312 | 875.3284 | 3.21      | -1 | 656    | C <sub>50</sub> H <sub>51</sub> O <sub>14</sub>               | (2M-H)-                   |

**Figure S55.** IR spectrum of neovanone B (6)

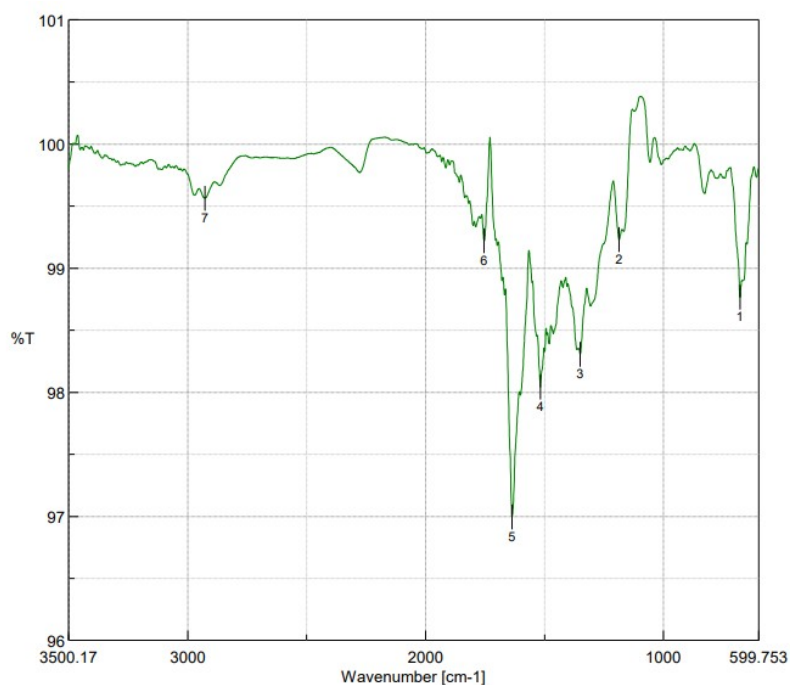

**Result of Peak Picking**

| No. | Position | Intensity | No. | Position | Intensity |
|-----|----------|-----------|-----|----------|-----------|
| 1   | 678.82   | 98.7635   | 2   | 1186.97  | 99.228    |
| 3   | 1349.93  | 98.3047   | 4   | 1517.7   | 98.0416   |
| 5   | 1637.27  | 96.9937   | 6   | 1753.94  | 99.2185   |
| 7   | 2927.41  | 99.5625   |     |          |           |

**Figure S56.** HPLC chromatogram for MAC-9C

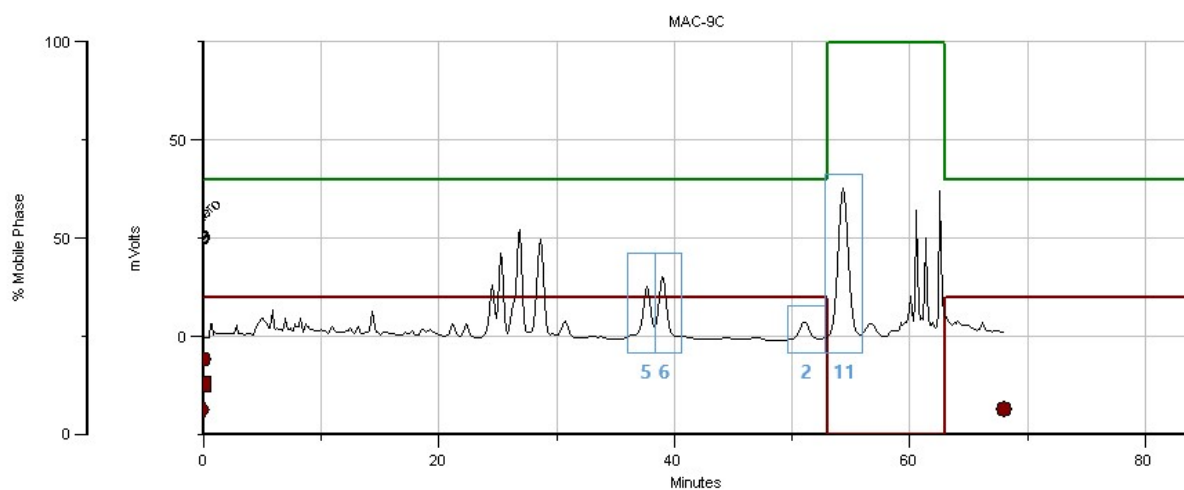

HPLC chromatogram of injected MAC-9C sample (Luna 5  $\mu\text{m}$  C18(2), 250 x 10 mm,  $\text{CH}_3\text{CN}$  (0.1% FA) 65% isocratic, 3 mL/min, 280 nm) to obtain **5** ( $t_R = 37$  min), **6** ( $t_R = 39$  min), **2** ( $t_R = 50$  min), and **11** ( $t_R = 53$  min)

**Figure S57.** Experimental CD spectra of neovanone A (**5**) and B (**6**)

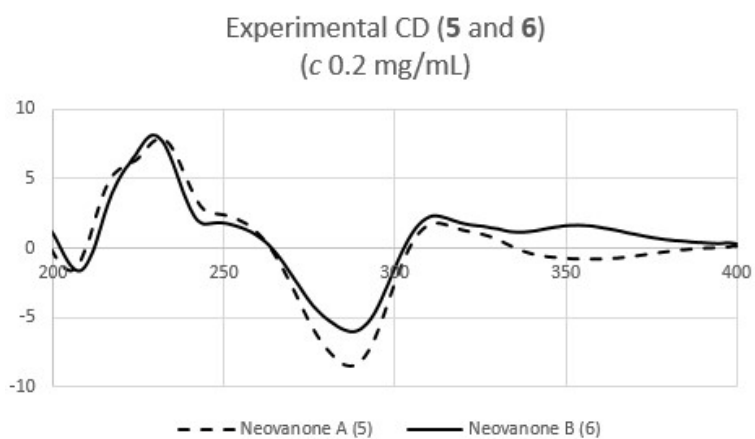

Figure S58–S85.  $^1\text{H}$  and  $^{13}\text{C}$  NMR spectra of known compounds (7–20)

Figure S58.  $^1\text{H}$  NMR spectrum of abyssinoflavanone V (7) in  $\text{CDCl}_3$

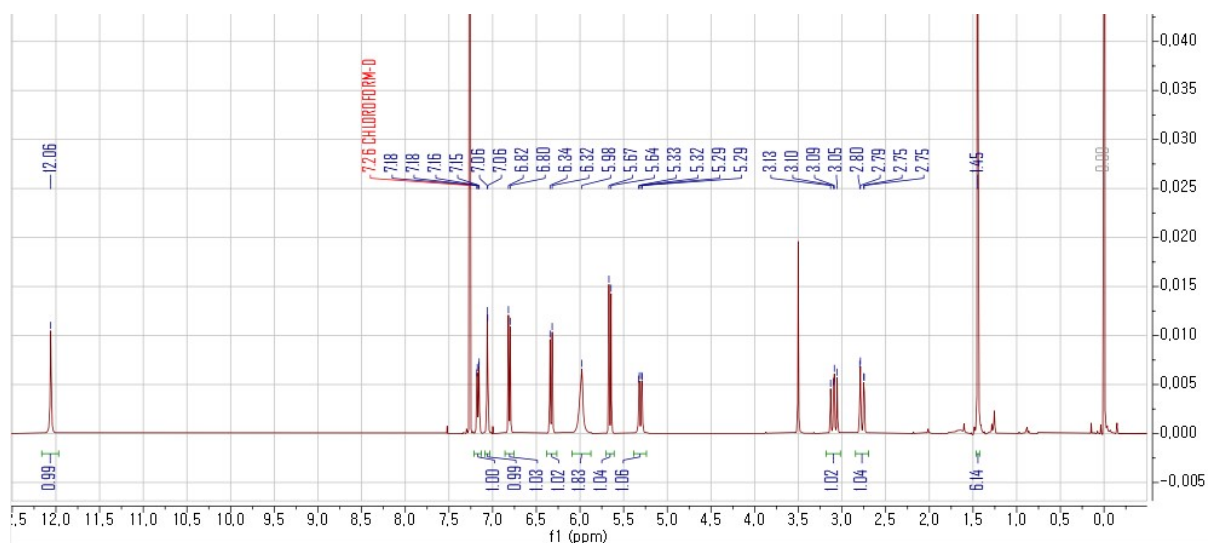

Figure S59.  $^{13}\text{C}$  NMR spectrum of abyssinoflavanone V (7) in  $\text{CDCl}_3$

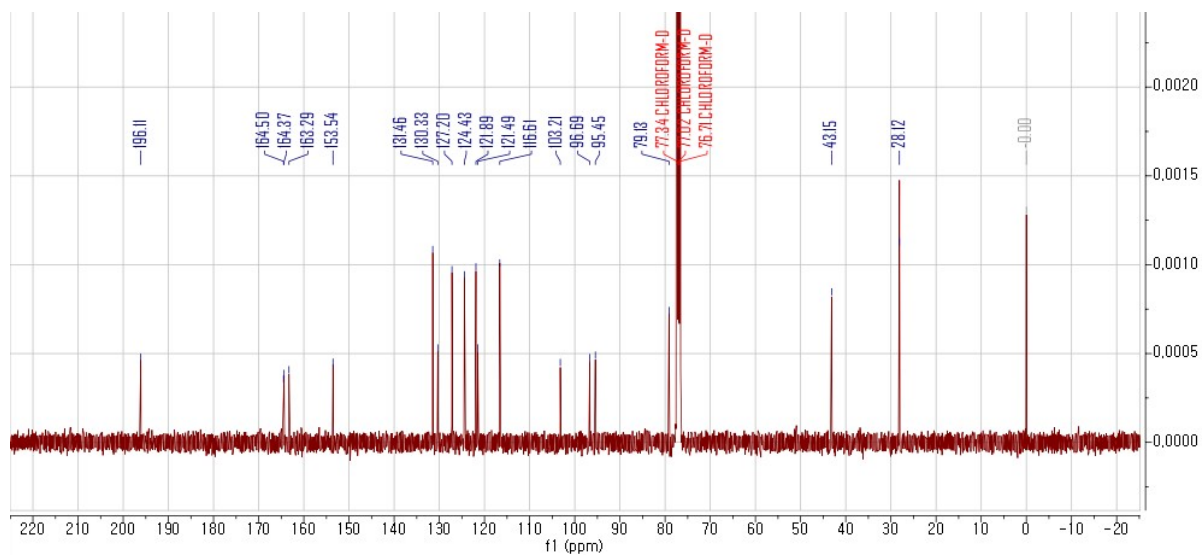



**Figure S60.**  $^1\text{H}$  NMR spectrum of sanggenol O (**8**) in  $\text{CDCl}_3$

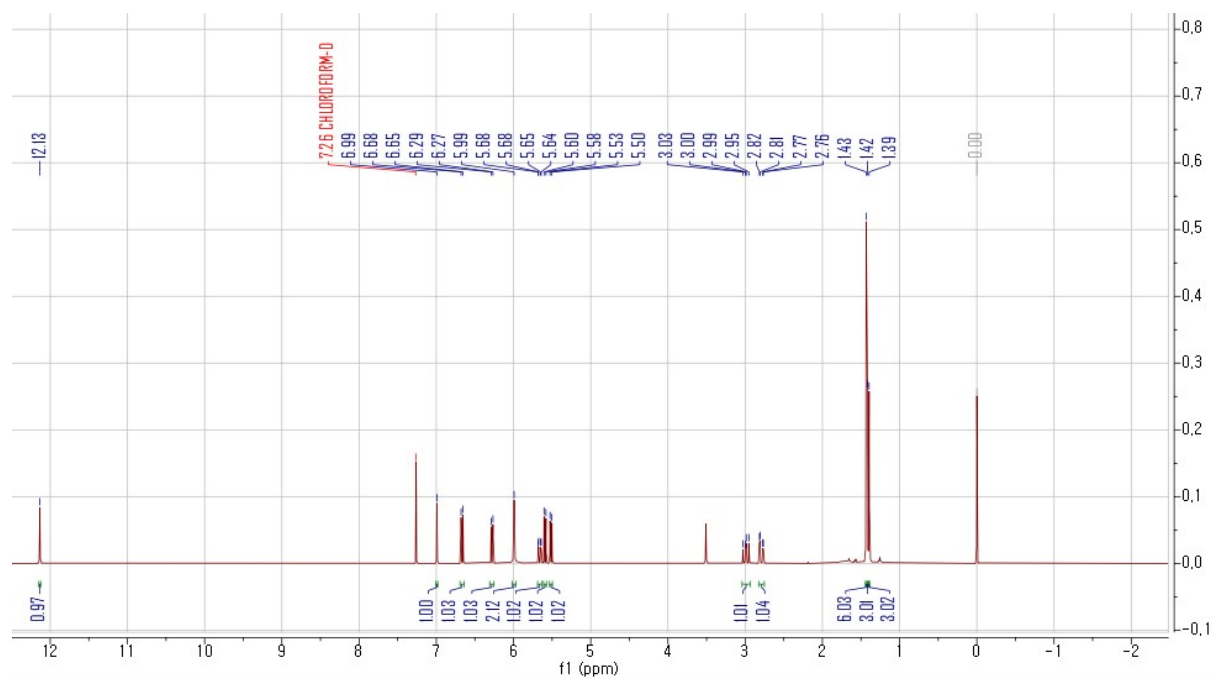

**Figure S61.**  $^{13}\text{C}$  NMR spectrum of sanggenol O (**8**) in  $\text{CDCl}_3$

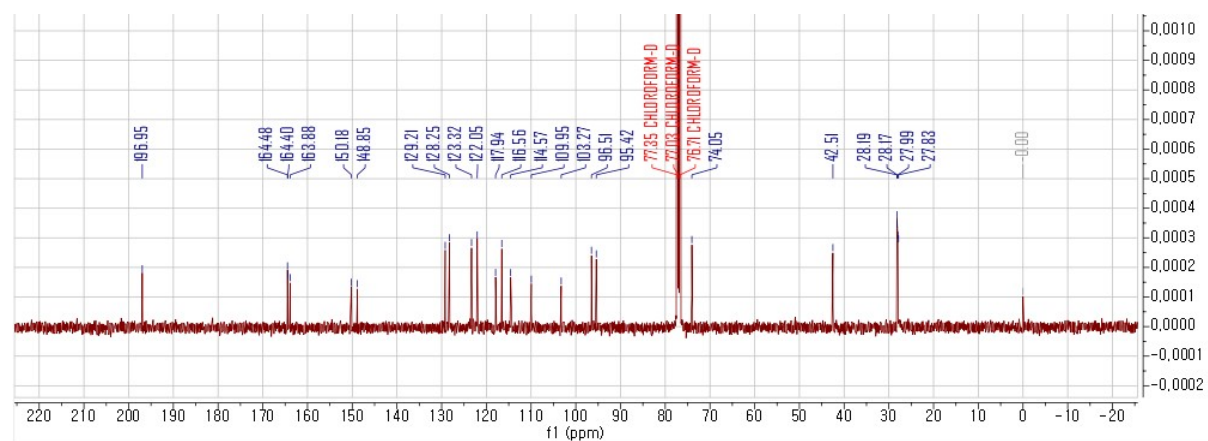

**Figure S62.**  $^1\text{H}$  NMR spectrum of cyclomorusin (**9**) in methanol- $d_4$

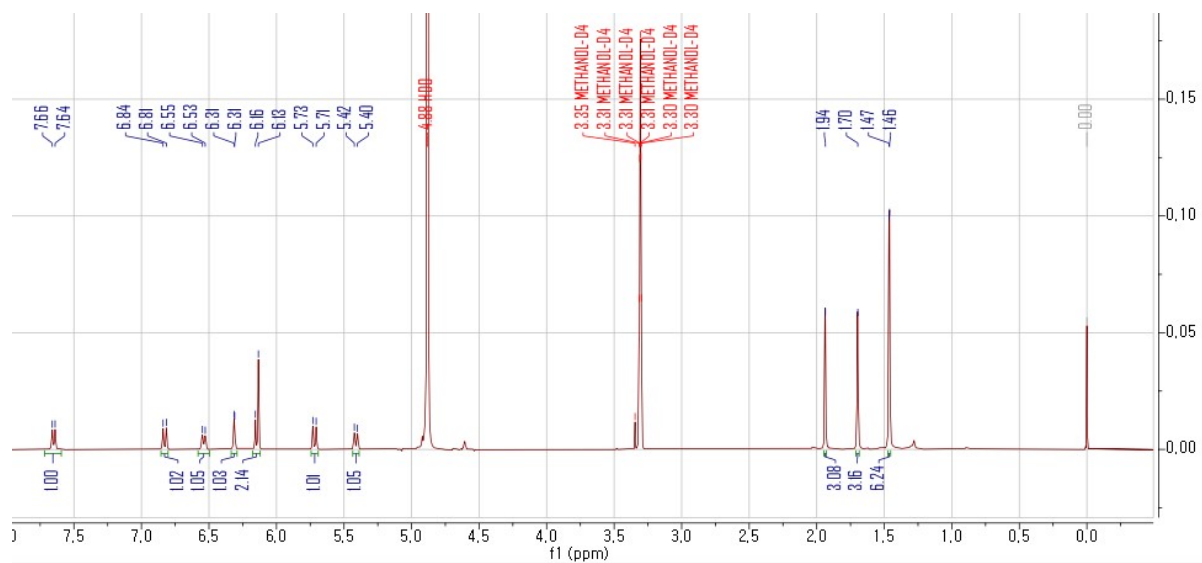

**Figure S63.**  $^{13}\text{C}$  NMR spectrum of cyclomorusin (**9**) in methanol- $d_4$

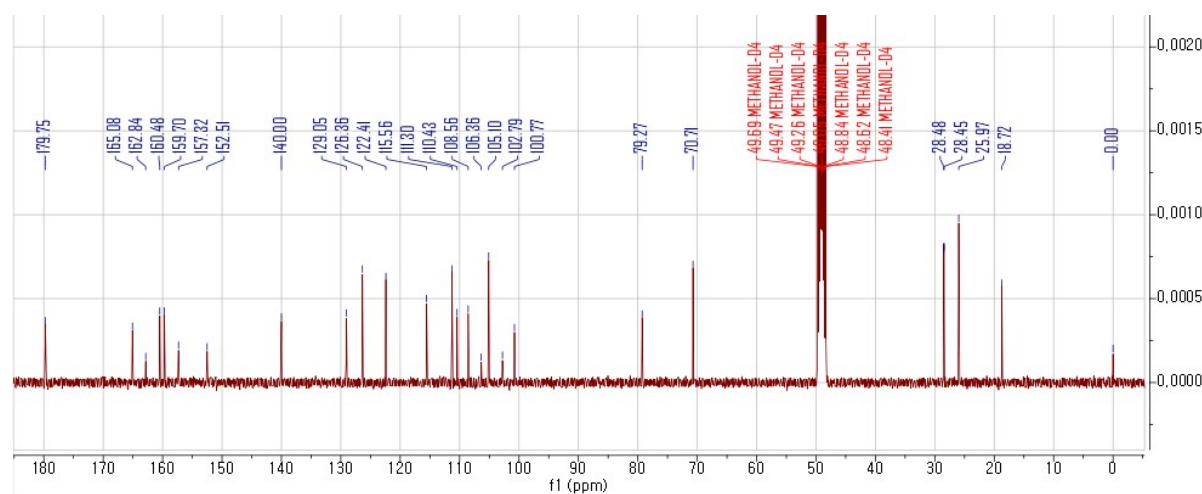

Figure S64. <sup>1</sup>H NMR spectrum of cycloaltilisins 7 (**10**) in CDCl<sub>3</sub>

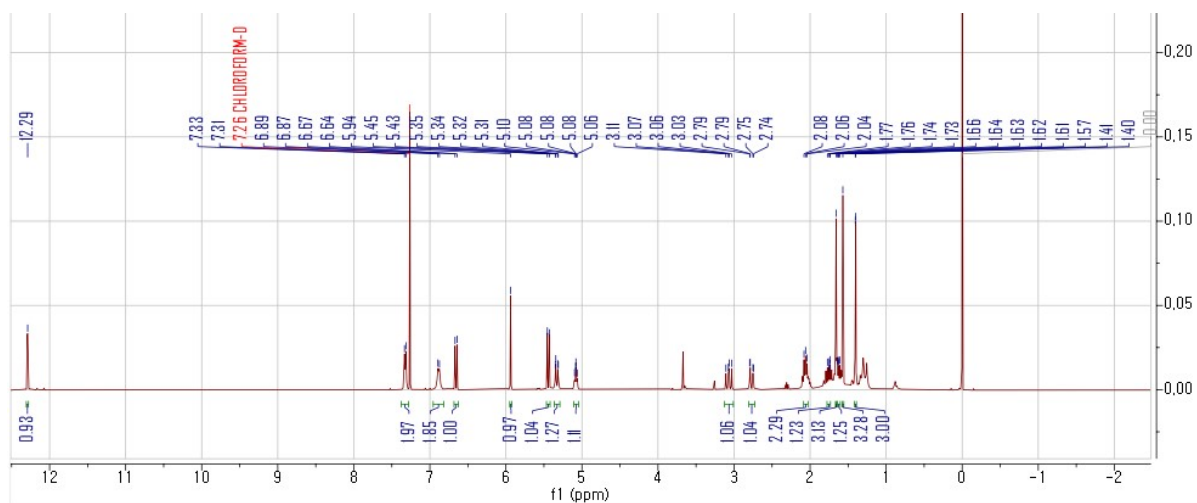

Figure S65. <sup>13</sup>C NMR spectrum of cycloaltilisins 7 (**10**) in CDCl<sub>3</sub>

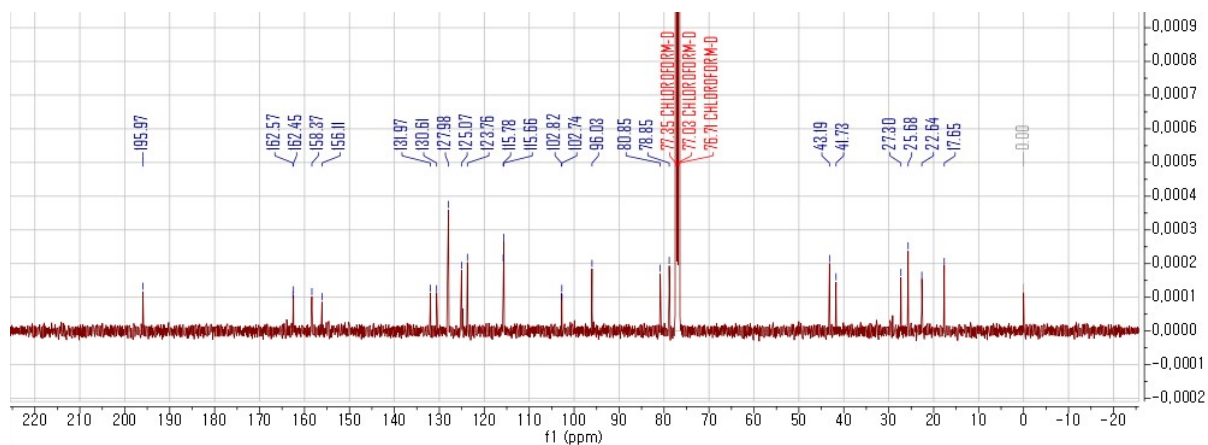

Figure S66. <sup>1</sup>H NMR spectrum of sanggenol P (11) in methanol-*d*<sub>4</sub>

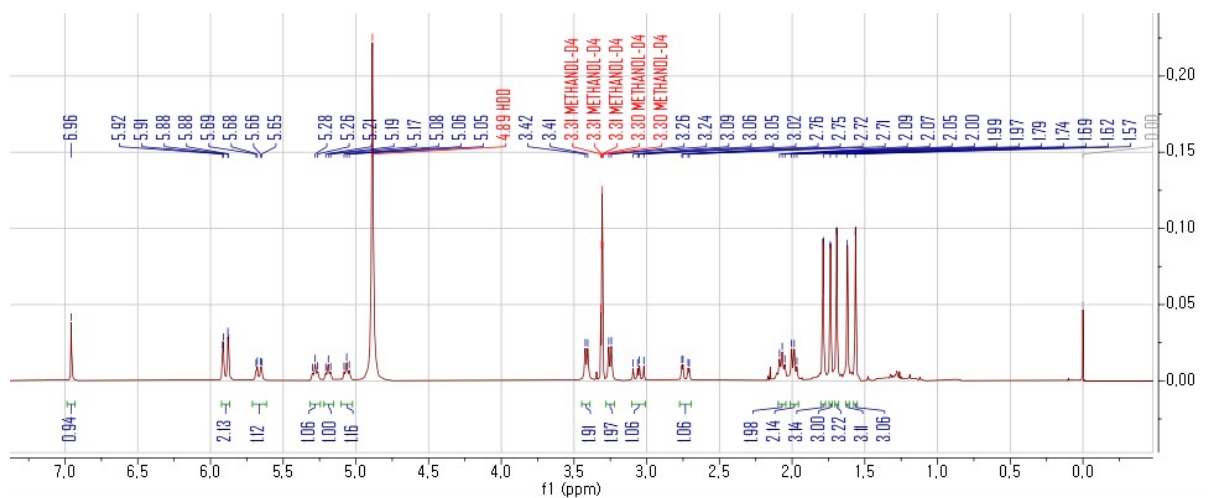

Figure S67. <sup>13</sup>C NMR spectrum of sanggenol P (11) in methanol-*d*<sub>4</sub>

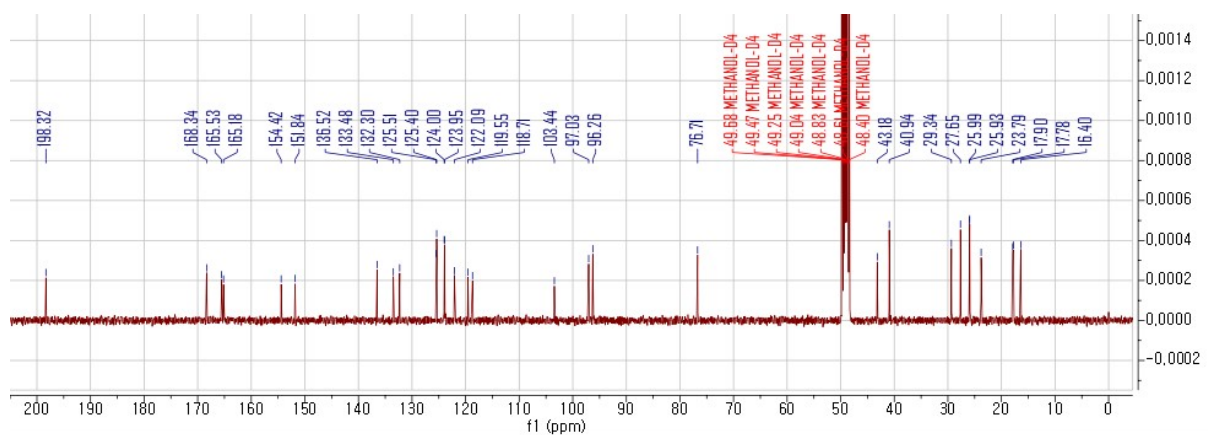

Figure S68.  $^1\text{H}$  NMR spectrum of morachalcone A (**12**) in methanol- $d_4$

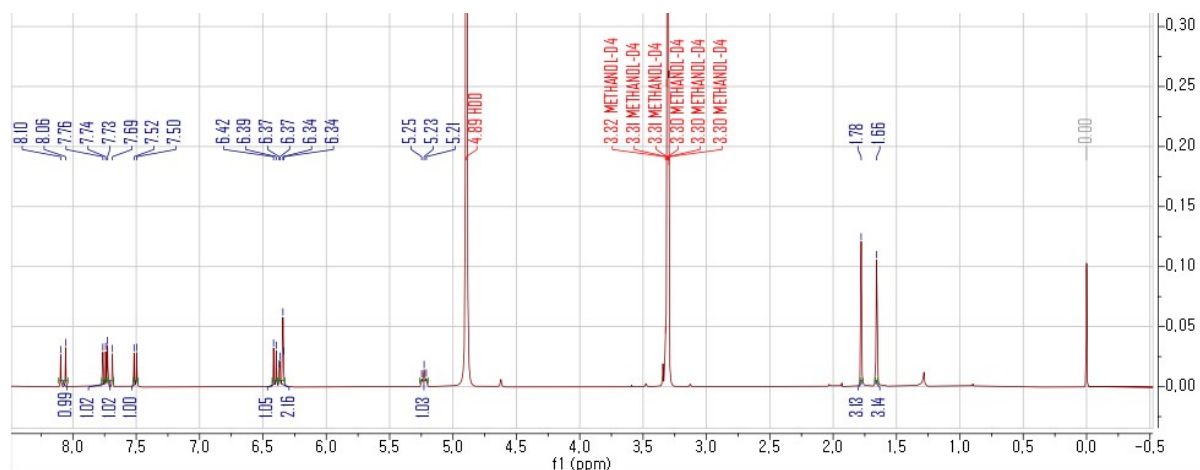

Figure S69.  $^{13}\text{C}$  NMR spectrum of morachalcone A (**12**) in methanol- $d_4$

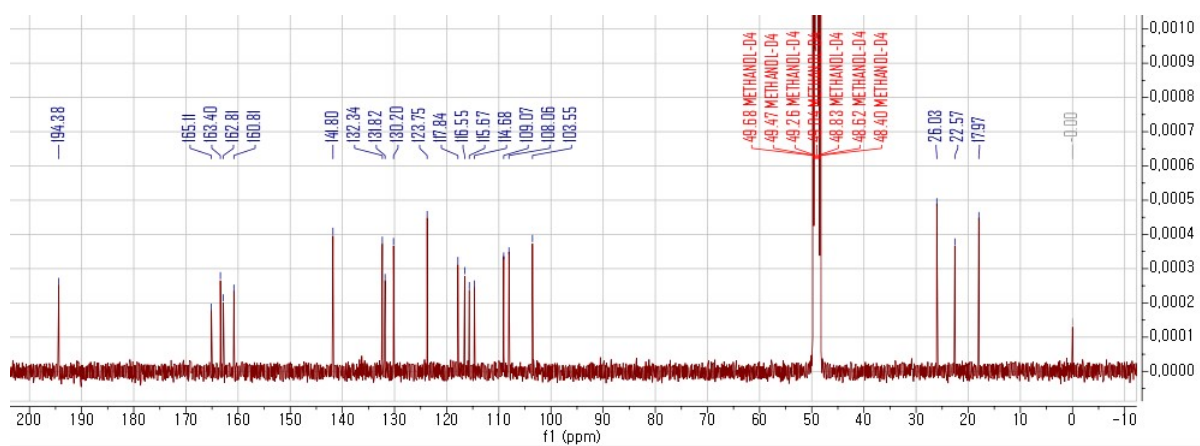

**Figure S70.**  $^1\text{H}$  NMR spectrum of betulinic acid (**13**) in  $\text{CDCl}_3$

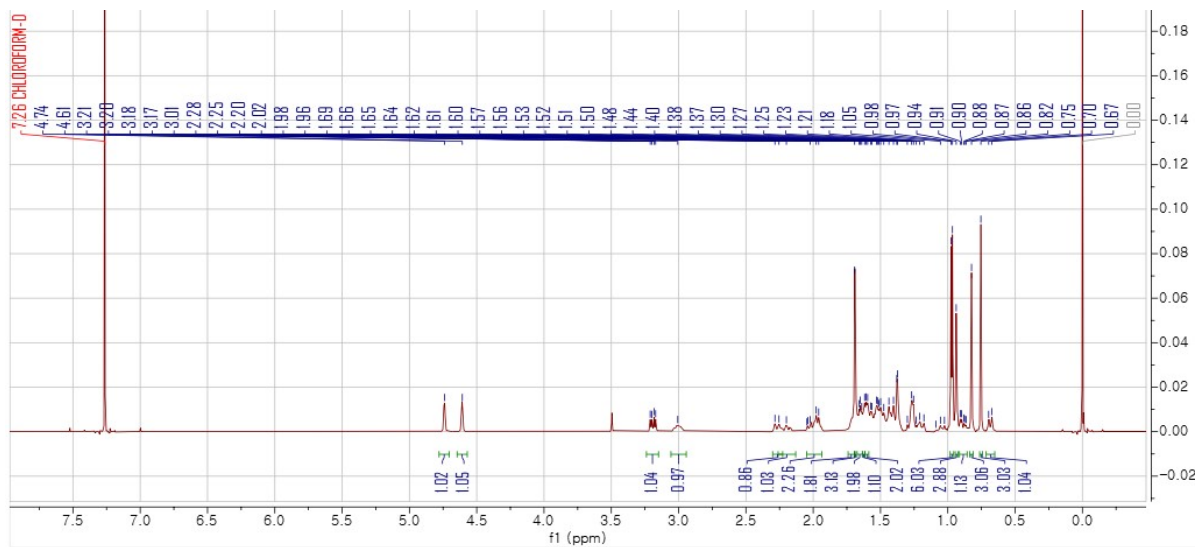

**Figure S71.**  $^{13}\text{C}$  NMR spectrum of betulinic acid (**13**) in  $\text{CDCl}_3$

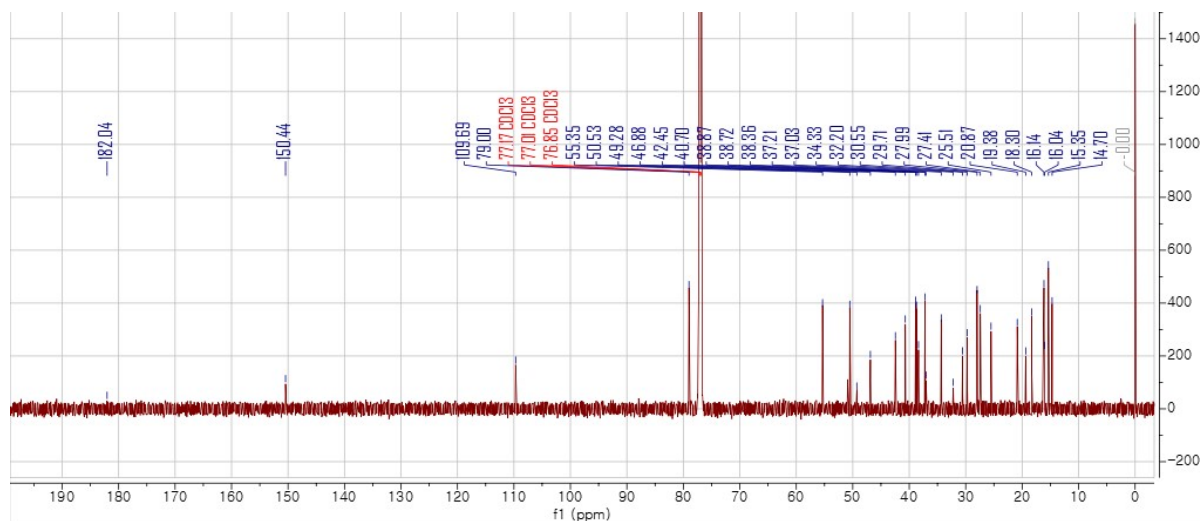

**Figure S72.**  $^1\text{H}$  NMR spectrum of scopoletin (**14**) in methanol- $d_4$

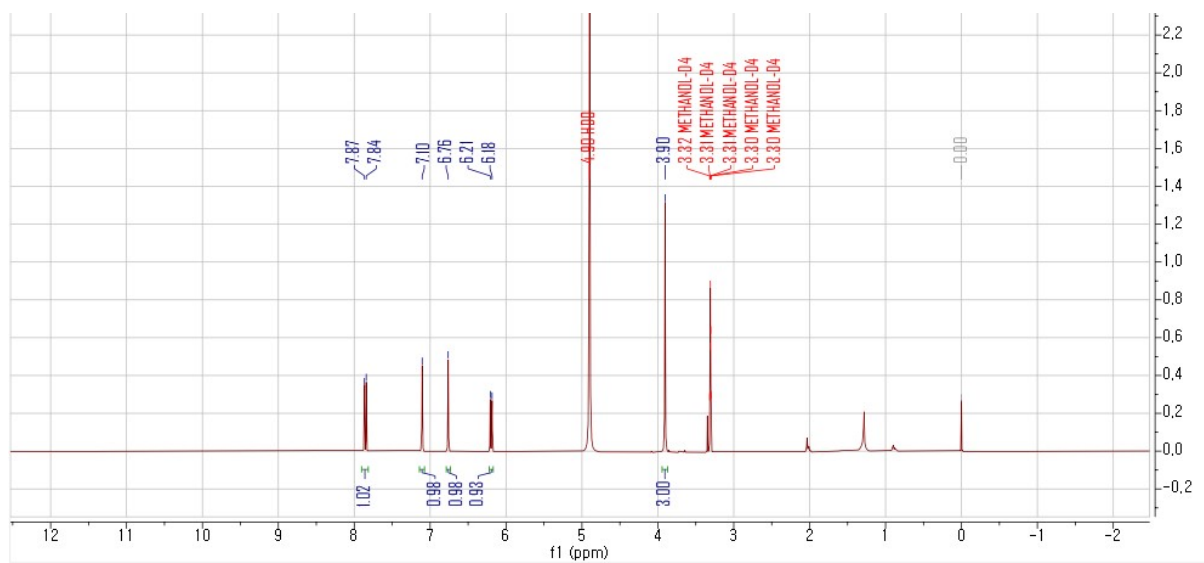

**Figure S73.**  $^{13}\text{C}$  NMR spectrum of scopoletin (**14**) in methanol- $d_4$

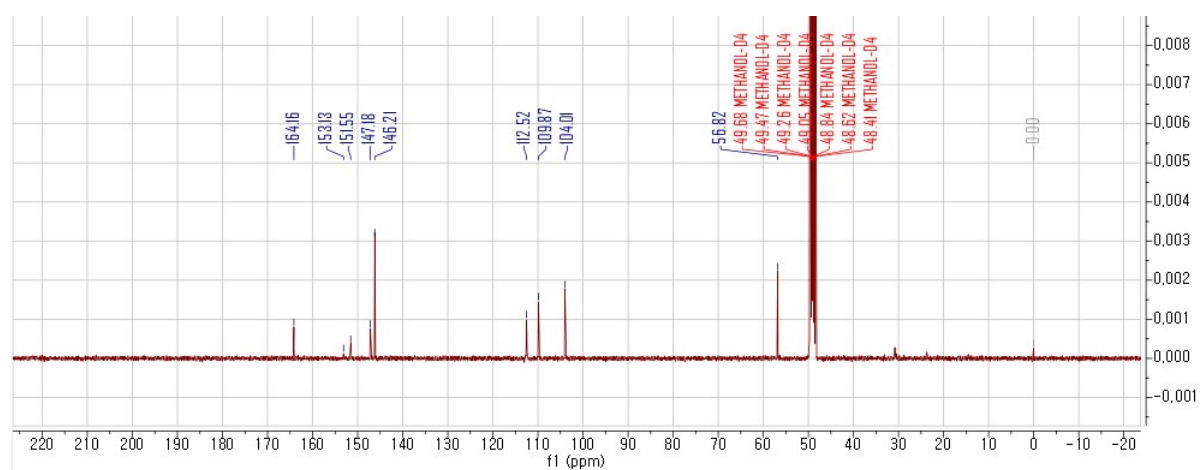

**Figure S74.**  $^1\text{H}$  NMR spectrum of umbelliferone (**15**) in methanol- $d_4$

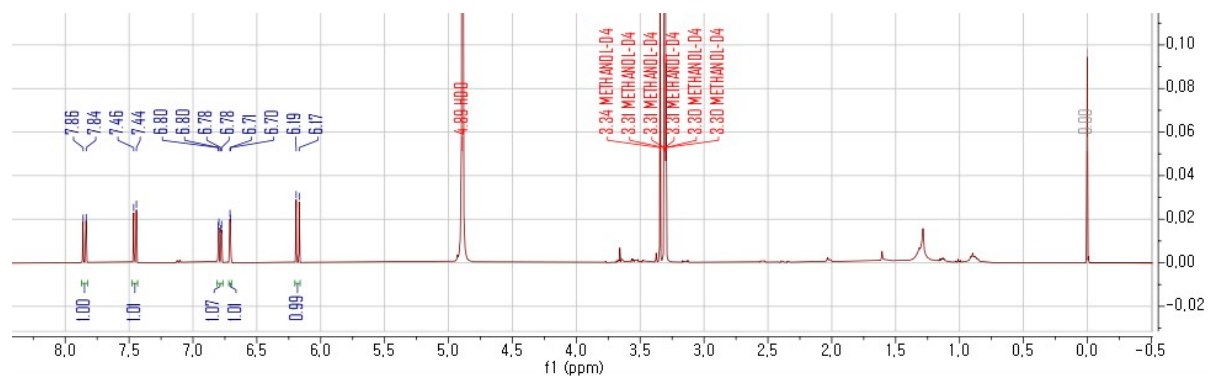

**Figure S75.**  $^{13}\text{C}$  NMR spectrum of umbelliferone (**15**) in methanol- $d_4$

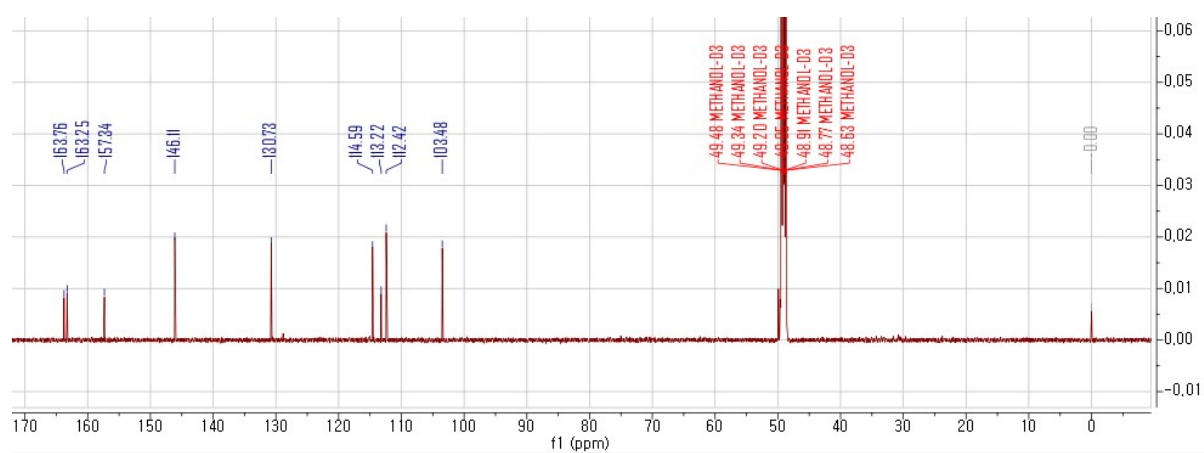



**Figure S76.**  $^1\text{H}$  NMR spectrum of morusalfuran E (**16**) in  $\text{CDCl}_3$

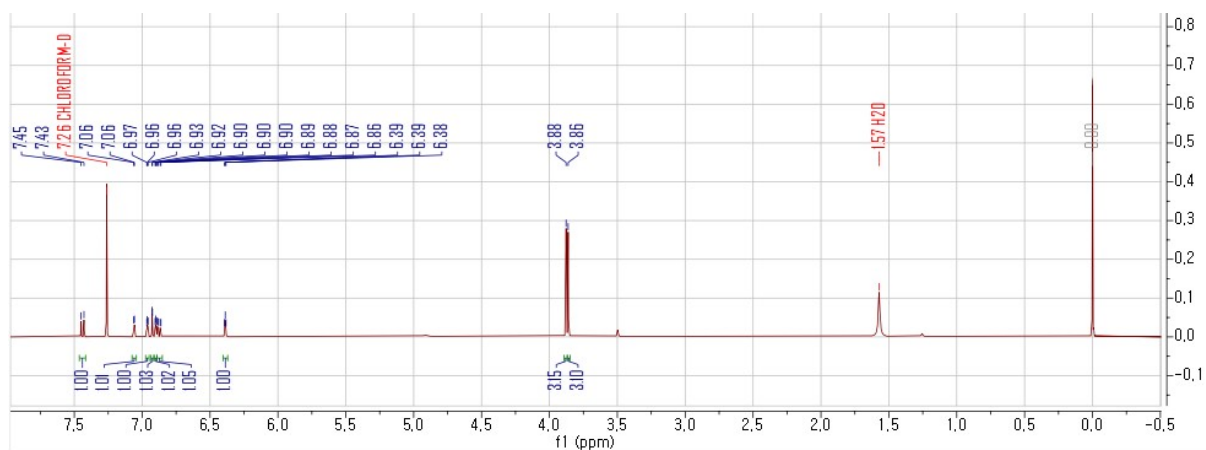

**Figure S77.**  $^{13}\text{C}$  NMR spectrum of morusalfuran E (**16**) in  $\text{CDCl}_3$

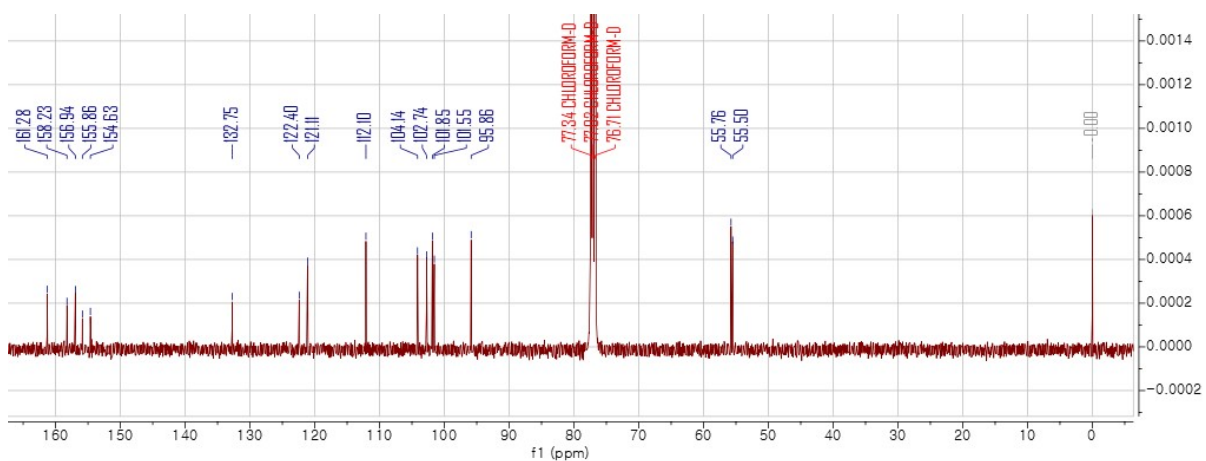

**Figure S78.**  $^1\text{H}$  NMR spectrum of sanggenofuran B (17) in  $\text{CDCl}_3$

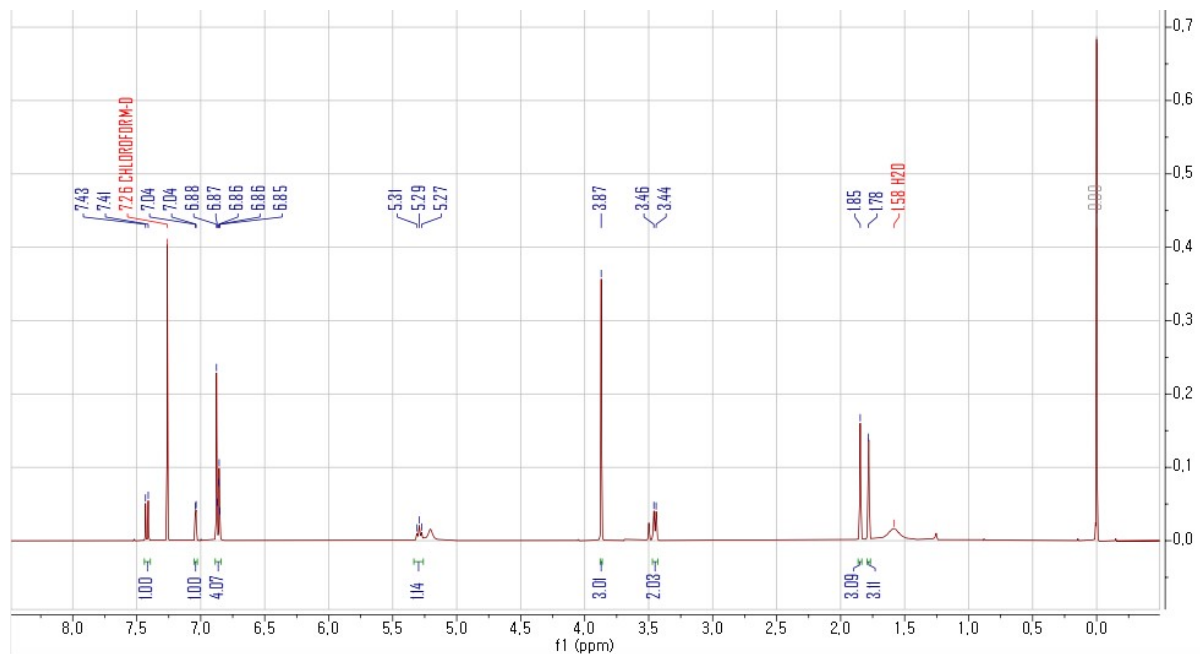

**Figure S79.**  $^{13}\text{C}$  NMR spectrum of sanggenofuran B (17) in  $\text{CDCl}_3$

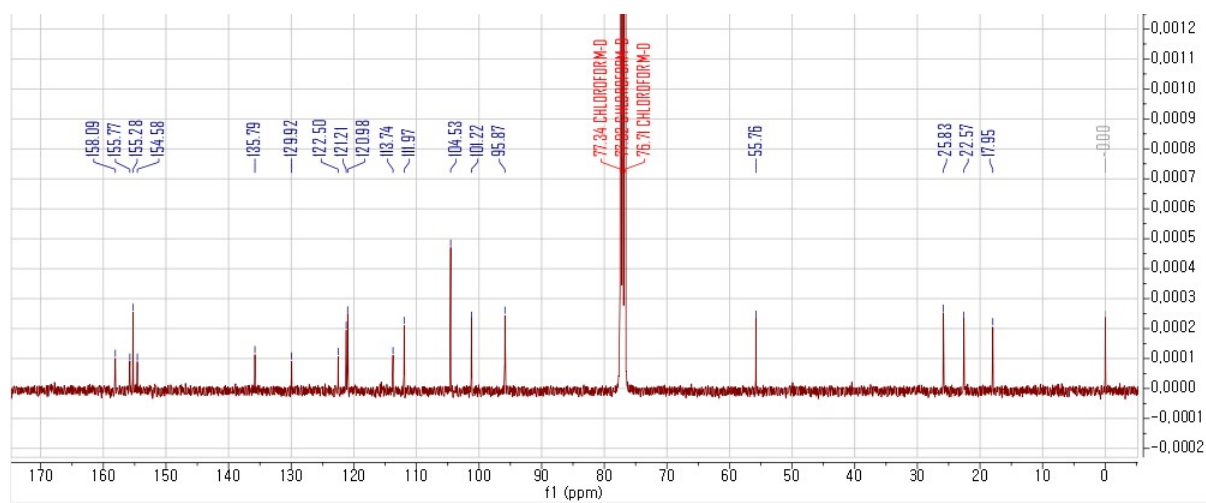

**Figure S80.**  $^1\text{H}$  NMR spectrum of moracin M (**18**) in methanol- $d_4$

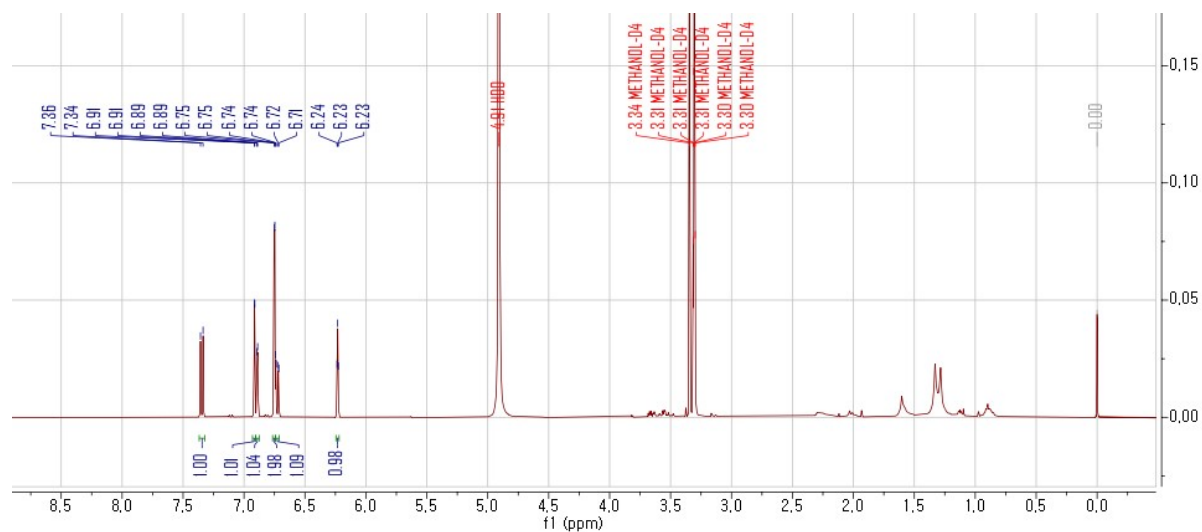

**Figure S81.**  $^{13}\text{C}$  NMR spectrum of moracin M (**18**) in methanol- $d_4$

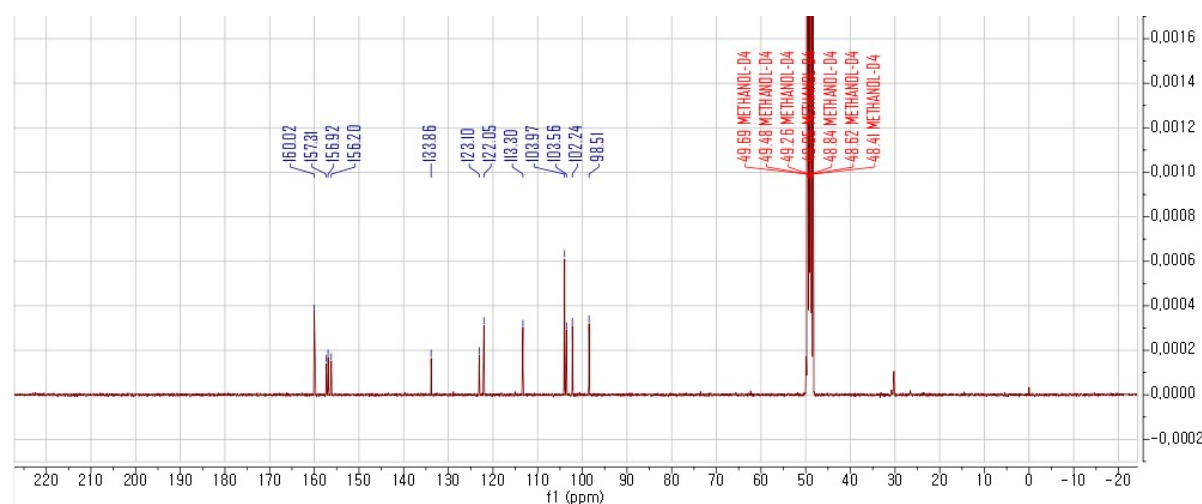

Figure S82.  $^1\text{H}$  NMR spectrum of moracin B (19) in methanol- $d_4$

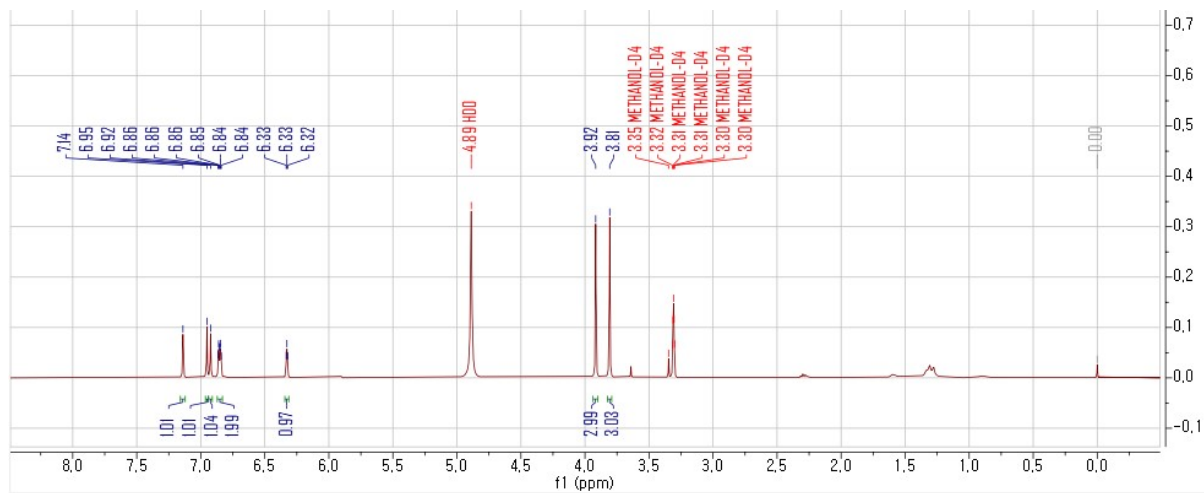

Figure S83.  $^{13}\text{C}$  NMR spectrum of moracin B (19) in methanol- $d_4$

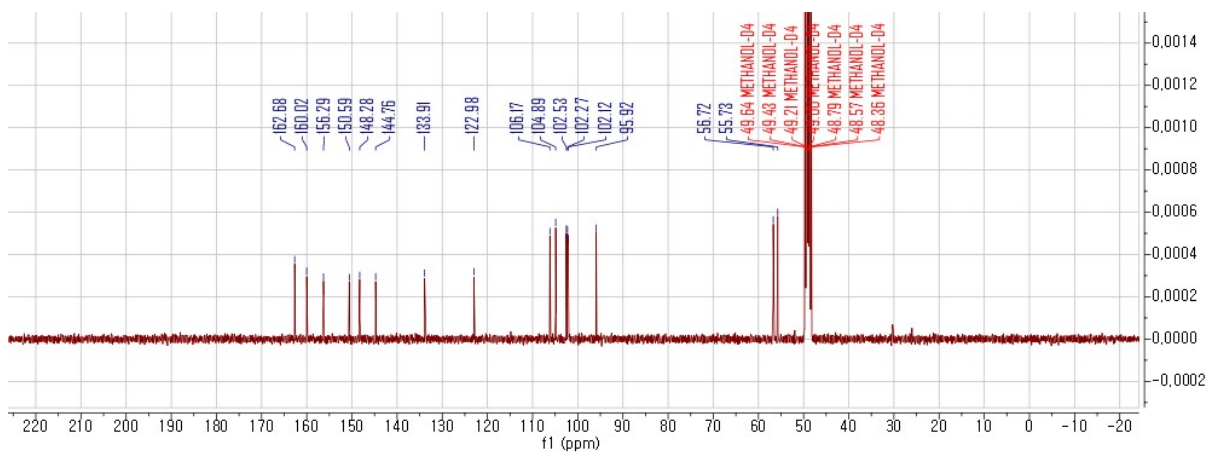

**Figure S84.**  $^1\text{H}$  NMR spectrum of moracin S (**20**) in methanol- $d_4$

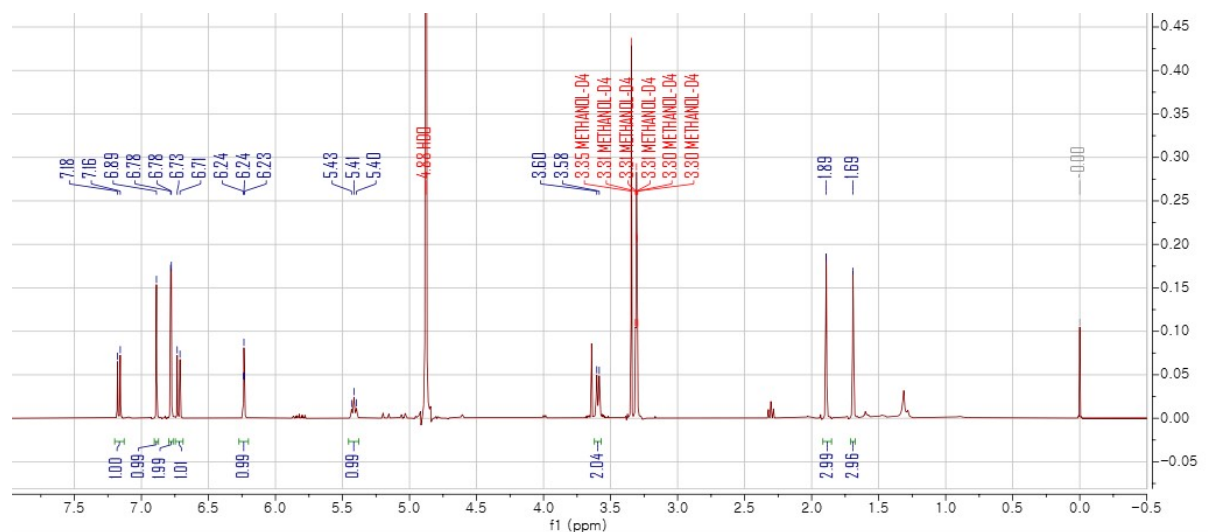

**Figure S85.**  $^{13}\text{C}$  NMR spectrum of moracin S (**20**) in methanol- $d_4$

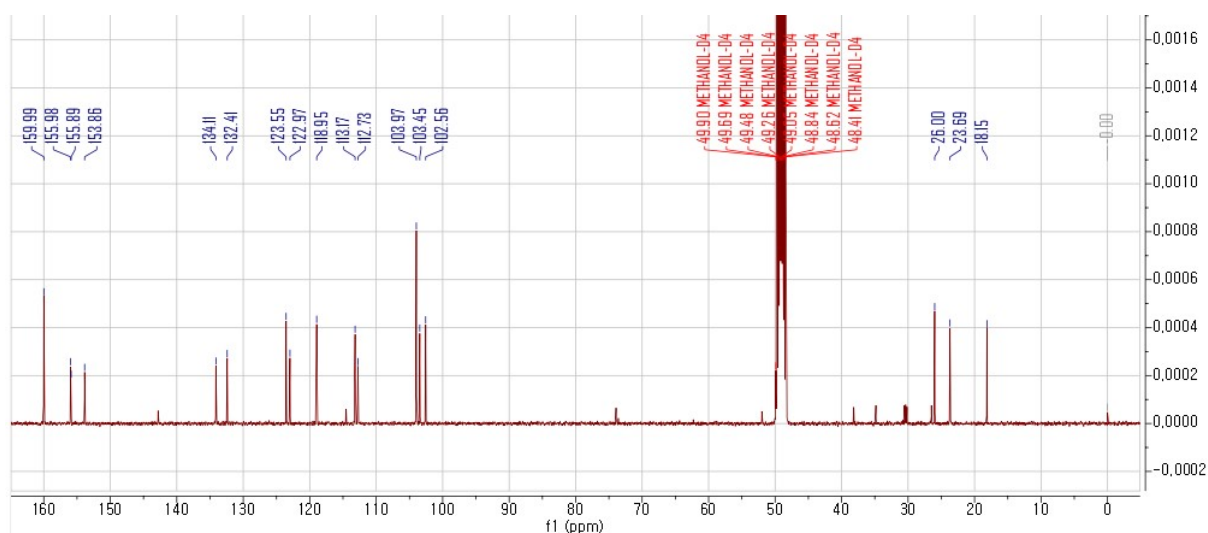

Supplement: d3ob00225j1.pdf [file d3ob00225j1.pdf]
